# Supplementary material for: Age-related methylation changes in the human sperm epigenome
Source: Aging (Albany NY). 2023 Feb 27;15(5):1257–78. doi: 10.18632/aging.204546 (PMC10042684; doi:10.18632/aging.204546)
Supplement: Supplementary Table 2 [file aging-15-204546-s003.xlsx]

## Sheet: Table S2. Sperm ageDMRs.
Supplementary Table 2. Sperm ageDMRs
Chromosome	start	end	width	AverageMethylation	DiffMeth_Age	P.Value_Age	adj.P.Val_Age	DMRtype	gene_id	symbol	gene_biotype	dToTss	TssGen	TssSymbol	TSS-Region
19	1649969	1650050	82	0.432299	-0.0168862	1.36881e-09	0.000234333	down	ENSG00000071564	TCF3	protein_coding	236	ENSG00000071564	TCF3	1
4	2061736	2061968	233	0.297253	-0.0100734	3.62343e-09	0.000234333	down	ENSG00000185818	NAT8L	protein_coding	2408	ENSG00000185818	NAT8L	0
19	54157956	54158003	48	0.489514	-0.0116286	3.7431e-09	0.000234333	down	ENSG00000105617	LENG1	protein_coding	1717	ENSG00000105617	LENG1	0
18	46096049	46096185	137	0.421198	-0.0131845	4.43522e-09	0.000234333	down	ENSG00000152234	ATP5F1A	protein_coding	2099	ENSG00000152234	ATP5F1A	0
X	2498537	2498582	46	0.289029	-0.0159996	4.45174e-09	0.000234333	down	ENSG00000169084;ENSG00000214717	DHRSX;ZBED1	protein_coding;protein_coding	1972	ENSG00000214717	ZBED1	0
19	5692021	5692149	129	0.188298	-0.0133199	4.69235e-09	0.000234333	down	ENSG00000196365	LONP1	protein_coding	1704	ENSG00000130255	RPL36	0
5	181282743	181282986	244	0.378583	-0.0140334	5.48946e-09	0.000234333	down	ENSG00000248103	NA	lncRNA	1367	ENSG00000248103	NA	0
19	14417343	14417483	141	0.451954	-0.0111833	5.51507e-09	0.000234333	down	ENSG00000123136	DDX39A	protein_coding	1578	ENSG00000123136	DDX39A	0
10	119177377	119177431	55	0.288761	-0.0127087	6.66132e-09	0.000234333	down	ENSG00000165672	PRDX3	protein_coding	1380	ENSG00000165672	PRDX3	0
21	44301179	44301526	348	0.619083	-0.00855641	7.09565e-09	0.000234333	down	ENSG00000141959	PFKL	protein_coding	1072	ENSG00000141959	PFKL	0
7	6591724	6592096	373	0.432685	-0.0127032	7.15491e-09	0.000234333	down	ENSG00000146576	C7orf26	protein_coding	0	ENSG00000146576	C7orf26	1
X	2498721	2498722	2	0.438503	-0.0173423	1.4639e-08	0.000422616	down	ENSG00000169084;ENSG00000214717	DHRSX;ZBED1	protein_coding;protein_coding	1832	ENSG00000214717	ZBED1	0
8	11017294	11017424	131	0.432981	-0.0106457	1.52499e-08	0.000422616	down	ENSG00000171044	XKR6	protein_coding	14812	ENSG00000171044	XKR6	0
19	4971476	4971605	130	0.466643	-0.0123167	1.74171e-08	0.000448199	down	ENSG00000127663	KDM4B	protein_coding	2343	ENSG00000127663	KDM4B	0
19	47746613	47746619	7	0.427465	-0.0108504	1.98552e-08	0.000476877	down	ENSG00000105373	NOP53	protein_coding	721	ENSG00000105373	NOP53	1
19	35719882	35720023	142	0.668819	-0.0105193	2.24142e-08	0.000504691	down	ENSG00000272333	KMT2B	protein_coding	31	ENSG00000272333	KMT2B	1
X	1593310	1593588	279	0.350471	-0.0102949	2.58576e-08	0.000516968	down	ENSG00000197976	AKAP17A	protein_coding	1684	ENSG00000197976	AKAP17A	0
2	26171325	26171462	138	0.291345	-0.011196	2.72098e-08	0.000516968	down				1625	ENSG00000157833	GAREM2	0
9	128948968	128949021	54	0.103714	-0.00565147	2.72644e-08	0.000516968	down	ENSG00000251184;ENSG00000095319	NA;NUP188	protein_coding;protein_coding	8	ENSG00000095319	NUP188	1
8	3040526	3040660	135	0.901875	0.00540791	3.10206e-08	0.000558781	up	ENSG00000183117	CSMD1	protein_coding	3127	ENSG00000183117	CSMD1	0
9	137424532	137424597	66	0.473465	-0.0126168	3.89079e-08	0.000667484	down	ENSG00000188747	NOXA1	protein_coding	981	ENSG00000188747	NOXA1	1
7	135663792	135663940	149	0.0817593	-0.00407729	4.66885e-08	0.000764555	down	ENSG00000243317	STMP1	protein_coding	1227	ENSG00000243317	STMP1	0
16	27548875	27549011	137	0.27777	-0.00942124	5.50507e-08	0.000843368	down	ENSG00000077235	GTF3C1	protein_coding	901	ENSG00000077235	GTF3C1	1
5	1593188	1593273	86	0.478732	-0.00967222	5.61832e-08	0.000843368	down	ENSG00000185986	SDHAP3	transcribed_unprocessed_pseudogene	15	ENSG00000185986	SDHAP3	1
5	69335173	69335380	208	0.227744	-0.00859299	6.17452e-08	0.000889785	down				1243	ENSG00000215006	CHCHD2P2	0
5	79219098	79219240	143	0.802174	0.0109552	7.45374e-08	0.000946571	up	ENSG00000132837	DMGDH	protein_coding	1701	ENSG00000206592	NA	0
13	45246169	45246307	139	0.847039	0.0088081	8.36707e-08	0.000946571	up	ENSG00000188342	GTF2F2	protein_coding	17382	ENSG00000270381	NA	0
16	1378682	1378785	104	0.198209	-0.0105411	8.43367e-08	0.000946571	down	ENSG00000059145	UNKL	protein_coding	335	ENSG00000059145	UNKL	1
3	196978201	196978349	149	0.812072	-0.00598869	8.46334e-08	0.000946571	down	ENSG00000286017	NA	lncRNA	4491	ENSG00000286017	NA	0
12	57004792	57004848	57	0.598376	-0.0156275	8.50173e-08	0.000946571	down	ENSG00000166860	ZBTB39	protein_coding	1697	ENSG00000166860	ZBTB39	0
1	2052155	2052400	246	0.512867	-0.0127815	8.66201e-08	0.000946571	down	ENSG00000067606	PRKCZ	protein_coding	1346	ENSG00000067606	PRKCZ	0
11	65042580	65042838	259	0.489599	-0.011007	8.76013e-08	0.000946571	down	ENSG00000168061	SAC3D1	protein_coding	1334	ENSG00000168061	SAC3D1	0
10	102398797	102398849	53	0.440885	-0.012834	8.98993e-08	0.000946571	down	ENSG00000077150	NFKB2	protein_coding	723	ENSG00000077150	NFKB2	1
9	136823388	136823540	153	0.83813	-0.00582153	9.16099e-08	0.000946571	down	ENSG00000272679;ENSG00000196642	NA;RABL6	lncRNA;protein_coding	0	ENSG00000196642	RABL6	1
9	135501936	135501999	64	0.246876	-0.00805731	9.2968e-08	0.000946571	down	ENSG00000122140	MRPS2	protein_coding	201	ENSG00000160345	C9orf116	1
12	121628489	121628489	1	0.22199	-0.0122721	1.00283e-07	0.000946571	down	ENSG00000276045	ORAI1	protein_coding	1672	ENSG00000276045	ORAI1	0
17	3844572	3844713	142	0.378132	-0.0120046	1.02279e-07	0.000946571	down	ENSG00000074356	NCBP3	protein_coding	1532	ENSG00000074356	NCBP3	0
2	207669591	207669797	207	0.598578	0.0131229	1.03582e-07	0.000946571	up	ENSG00000224137	LINC01857	lncRNA	7214	ENSG00000224137	LINC01857	0
2	27119560	27119696	137	0.592531	-0.00838291	1.04105e-07	0.000946571	down				431	ENSG00000138028	CGREF1	1
19	12800155	12800286	132	0.865752	-0.00418324	1.09039e-07	0.000946571	down	ENSG00000095066;ENSG00000167815;ENSG00000267062	HOOK2;PRDX2;NA	protein_coding;protein_coding;lncRNA	0	ENSG00000167815	PRDX2	1
20	2653816	2653949	134	0.0968559	-0.00789304	1.09767e-07	0.000946571	down	ENSG00000101361	NOP56	protein_coding	262	ENSG00000221116	SNORD110	1
7	44020354	44020546	193	0.754866	-0.00676869	1.10352e-07	0.000946571	down	ENSG00000285596	NA	lncRNA	1178	ENSG00000214783	POLR2J4	0
19	17577827	17578030	204	0.207455	-0.00777931	1.42534e-07	0.00115532	down	ENSG00000130309	COLGALT1	protein_coding	751	ENSG00000130309	COLGALT1	1
20	58949151	58949226	76	0.624658	0.0155912	1.44205e-07	0.00115532	up	ENSG00000285091	NA	lncRNA	883	ENSG00000284985	NA	1
8	2986740	2986800	61	0.904343	0.00525696	1.47053e-07	0.00115532	up	ENSG00000183117	CSMD1	protein_coding	56987	ENSG00000183117	CSMD1	0
6	31198494	31198736	243	0.0830679	-0.00343016	1.47516e-07	0.00115532	down	ENSG00000206344	HCG27	lncRNA	353	ENSG00000206344	HCG27	1
22	22117185	22117343	159	0.054094	-0.0032902	1.71516e-07	0.00124101	down	ENSG00000263366	ABHD17AP5	processed_pseudogene	661	ENSG00000263366	ABHD17AP5	1
20	63982416	63982466	51	0.589179	-0.0104114	1.74061e-07	0.00124101	down	ENSG00000101161	PRPF6	protein_coding	1283	ENSG00000101161	PRPF6	0
17	80148966	80149159	194	0.18608	-0.00644888	1.744e-07	0.00124101	down				467	ENSG00000275479	NA	1
17	19239271	19239448	178	0.159176	-0.00931379	1.76675e-07	0.00124101	down	ENSG00000072134	EPN2	protein_coding	1773	ENSG00000072134	EPN2	0
14	50625639	50625767	129	0.775246	0.00995153	1.79093e-07	0.00124101	up	ENSG00000198513	ATL1	protein_coding	2398	ENSG00000198513	ATL1	0
1	224186569	224186638	70	0.518952	-0.0132917	1.79125e-07	0.00124101	down	ENSG00000143753	DEGS1	protein_coding	2893	ENSG00000143753	DEGS1	0
6	42881187	42881322	136	0.499649	-0.0141768	1.87516e-07	0.00127463	down	ENSG00000146223	RPL7L1	protein_coding	325	ENSG00000146223	RPL7L1	1
18	23505218	23505358	141	0.53441	-0.0098382	2.01426e-07	0.00133806	down	ENSG00000141452	RMC1	protein_coding	1682	ENSG00000141452	RMC1	0
8	143358823	143358921	99	0.27099	-0.00964296	2.04275e-07	0.00133806	down	ENSG00000184428	TOP1MT	protein_coding	156	ENSG00000184428	TOP1MT	1
17	42668618	42668753	136	0.752392	-0.00730658	2.09548e-07	0.00134808	down	ENSG00000068137	PLEKHH3	protein_coding	944	ENSG00000068137	PLEKHH3	1
16	1825178	1825293	116	0.279671	-0.00968925	2.22631e-07	0.00137328	down	ENSG00000063854	HAGH	protein_coding	1266	ENSG00000063854	HAGH	0
19	8499727	8499790	64	0.632169	-0.0117597	2.23954e-07	0.00137328	down	ENSG00000133246	PRAM1	protein_coding	2843	ENSG00000133246	PRAM1	0
19	10501351	10501425	75	0.56135	-0.0131312	2.32038e-07	0.00137328	down	ENSG00000079999	KEAP1	protein_coding	1259	ENSG00000079999	KEAP1	0
10	132389129	132389274	146	0.123064	-0.00820966	2.37809e-07	0.00137328	down				7893	ENSG00000171813	PWWP2B	0
6	170134588	170134621	34	0.368654	-0.0192442	2.38559e-07	0.00137328	down				752	ENSG00000288162	NA	1
3	136865019	136865115	97	0.56202	-0.00933238	2.39809e-07	0.00137328	down	ENSG00000158092	NCK1	protein_coding	2400	ENSG00000239213	NCK1-DT	0
15	50910804	50910817	14	0.289583	-0.013876	2.40147e-07	0.00137328	down	ENSG00000081014	AP4E1	protein_coding	2008	ENSG00000081014	AP4E1	0
11	1308373	1308492	120	0.252903	-0.0122071	2.47242e-07	0.00139176	down	ENSG00000078902	TOLLIP	protein_coding	1090	ENSG00000078902	TOLLIP	0
2	201096822	201096943	122	0.535038	-0.00834467	2.58099e-07	0.00143052	down				800	ENSG00000273975	Metazoa_SRP	1
16	30353790	30353967	178	0.595362	-0.00975213	2.75851e-07	0.001505	down	ENSG00000169217	CD2BP2	protein_coding	697	ENSG00000260219	CD2BP2-DT	1
16	31184536	31184605	70	0.885669	-0.00533839	2.79892e-07	0.001505	down	ENSG00000089280	FUS	protein_coding	474	ENSG00000089280	FUS	1
10	3197388	3197535	148	0.665079	-0.00826971	3.02174e-07	0.00157936	down				13130	ENSG00000288566	NA	0
2	222947467	222947506	40	0.687436	0.0119866	3.02488e-07	0.00157936	up				1078	ENSG00000278083	NA	0
11	804279	804497	219	0.198371	-0.00825133	3.09528e-07	0.00159303	down	ENSG00000177595	PIDD1	protein_coding	0	ENSG00000177595	PIDD1	1
22	44868823	44868888	66	0.387882	-0.0150704	3.34938e-07	0.00169095	down				9161	ENSG00000241484	ARHGAP8	0
5	143274672	143274813	142	0.814113	0.00657051	3.37942e-07	0.00169095	up				57791	ENSG00000231579	RPL7P21	0
19	41929075	41929122	48	0.179425	-0.00950409	3.64703e-07	0.00177766	down	ENSG00000076928	ARHGEF1	protein_coding	254	ENSG00000076928	ARHGEF1	1
19	56090544	56090588	45	0.781956	-0.00676223	3.65139e-07	0.00177766	down	ENSG00000142409	ZNF787	protein_coding	12895	ENSG00000142409	ZNF787	0
11	61330705	61330952	248	0.898746	-0.00362483	3.70995e-07	0.00178209	down	ENSG00000167986	DDB1	protein_coding	495	ENSG00000167986	DDB1	1
11	62854755	62854831	77	0.0616938	-0.00526851	4.23156e-07	0.00199922	down	ENSG00000255717	SNHG1	lncRNA	59	ENSG00000274544	SNORD28	1
19	50024157	50024279	123	0.410088	-0.00836788	4.31334e-07	0.00199922	down	ENSG00000105053	VRK3	protein_coding	859	ENSG00000105053	VRK3	1
19	49021198	49021244	47	0.603108	-0.0104375	4.3351e-07	0.00199922	down				674	ENSG00000268655	NA	1
16	67817932	67817937	6	0.583863	-0.0108216	4.38395e-07	0.00199922	down	ENSG00000102904	TSNAXIP1	protein_coding	9612	ENSG00000102904	TSNAXIP1	0
1	182790691	182790939	249	0.0718773	-0.00351449	4.44445e-07	0.00200147	down	ENSG00000135838	NPL	protein_coding	917	ENSG00000135838	NPL	1
13	112892840	112892977	138	0.559979	-0.010035	4.67175e-07	0.00207584	down				1400	ENSG00000126217	MCF2L	0
19	4579739	4579888	150	0.184943	-0.00762547	4.7567e-07	0.00207584	down	ENSG00000167680	SEMA6B	protein_coding	1887	ENSG00000167680	SEMA6B	0
19	43591613	43591742	130	0.277801	-0.0093286	4.78245e-07	0.00207584	down	ENSG00000268361;ENSG00000167378	NA;IRGQ	protein_coding;protein_coding	1264	ENSG00000167378	IRGQ	0
11	116788806	116788887	82	0.423221	-0.010462	4.90115e-07	0.00210204	down				766	ENSG00000109917	ZPR1	1
5	178560603	178560724	122	0.629627	-0.0160673	5.03994e-07	0.00211038	down	ENSG00000050767	COL23A1	protein_coding	1513	ENSG00000050767	COL23A1	0
4	29625938	29626007	70	0.900566	0.00524689	5.07858e-07	0.00211038	up				115302	ENSG00000283666	U6	0
19	49554536	49554724	189	0.529219	-0.0102535	5.09634e-07	0.00211038	down				2570	ENSG00000142546	NOSIP	0
12	123763484	123763498	15	0.06621	-0.00504952	5.45118e-07	0.00223167	down	ENSG00000197653	DNAH10	protein_coding	988	ENSG00000197653	DNAH10	1
12	125066485	125066543	59	0.550416	-0.0123354	5.53844e-07	0.00224192	down	ENSG00000081760	AACS	protein_coding	1049	ENSG00000081760	AACS	0
2	24776258	24776465	208	0.848245	0.00724451	5.76179e-07	0.00229803	up				8486	ENSG00000084676	NCOA1	0
7	99918289	99918491	203	0.367262	-0.00755243	5.80464e-07	0.00229803	down	ENSG00000146833	TRIM4	protein_coding	613	ENSG00000146833	TRIM4	1
12	132154849	132155404	556	0.0925357	-0.00392795	5.93039e-07	0.00232019	down				4007	ENSG00000184967	NOC4L	0
6	43628290	43628435	146	0.233913	-0.0082013	5.98942e-07	0.00232019	down	ENSG00000172432	GTPBP2	protein_coding	435	ENSG00000172432	GTPBP2	1
11	65336059	65336109	51	0.79202	-0.00723241	6.20351e-07	0.00237756	down	ENSG00000133884	DPF2	protein_coding	2181	ENSG00000133884	DPF2	0
19	4281039	4281167	129	0.760892	-0.00692315	6.58644e-07	0.00249775	down	ENSG00000105251	SHD	protein_coding	1742	ENSG00000105251	SHD	0
15	52110857	52110930	74	0.680288	-0.0112038	6.91502e-07	0.0025851	down	ENSG00000137875	BCL2L10	protein_coding	1837	ENSG00000137875	BCL2L10	0
17	5417695	5417754	60	0.315255	-0.0147334	6.96028e-07	0.0025851	down	ENSG00000108559	NUP88	protein_coding	474	ENSG00000108559	NUP88	1
17	28721967	28722104	138	0.790175	-0.00799605	7.38393e-07	0.00269413	down	ENSG00000198242;ENSG00000264577	RPL23A;NA	protein_coding;lncRNA	477	ENSG00000238578	SNORD4A	1
11	47591683	47591688	6	0.484444	-0.0112574	7.4034e-07	0.00269413	down	ENSG00000172247	C1QTNF4	protein_coding	872	ENSG00000172247	C1QTNF4	1
12	95434958	95435066	109	0.671949	0.0137707	7.66472e-07	0.00276133	up	ENSG00000257943;ENSG00000289510	NA;NA	transcribed_unitary_pseudogene;lncRNA	1742	ENSG00000257943	NA	0
20	63518764	63518974	211	0.689677	-0.00994851	7.79471e-07	0.00278036	down				1790	ENSG00000125534	PPDPF	0
2	61467783	61467924	142	0.778768	-0.00748205	8.3609e-07	0.00293001	down	ENSG00000115464	USP34	protein_coding	2765	ENSG00000115464	USP34	0
12	53968306	53968386	81	0.837706	-0.00572266	8.37692e-07	0.00293001	down	ENSG00000228630;ENSG00000277129	HOTAIR;NA	lncRNA;misc_RNA	0	ENSG00000277129	NA	1
4	82816240	82816374	135	0.800625	0.00797371	8.47126e-07	0.00293452	up				5076	ENSG00000138674	SEC31A	0
7	1405064	1405097	34	0.327689	-0.0117353	8.56777e-07	0.00293968	down				32513	ENSG00000164877	MICALL2	0
1	27599392	27599460	69	0.816573	-0.00913336	8.90007e-07	0.00301749	down	ENSG00000126705	AHDC1	protein_coding	3953	ENSG00000126705	AHDC1	0
X	154545561	154545692	132	0.281029	-0.0130205	9.03907e-07	0.00301749	down	ENSG00000160211;ENSG00000269335	G6PD;IKBKG	protein_coding;protein_coding	234	ENSG00000269335	IKBKG	1
1	56595116	56595315	200	0.840763	0.005284	9.04582e-07	0.00301749	up	ENSG00000162407	PLPP3	protein_coding	8873	ENSG00000224980	RPL23AP85	0
12	114736920	114737259	340	0.0454251	-0.00224933	9.13536e-07	0.0030194	down	ENSG00000257817	TBX3-AS1	lncRNA	444	ENSG00000252459	NA	1
19	45094555	45094724	170	0.178527	-0.00601325	9.22225e-07	0.00302041	down	ENSG00000007047;ENSG00000104866	MARK4;PPP1R37	protein_coding;protein_coding	1349	ENSG00000104866	PPP1R37	0
11	62928197	62928363	167	0.733967	-0.00954016	9.64725e-07	0.00313114	down				6389	ENSG00000168539	CHRM1	0
7	2241162	2241298	137	0.228848	-0.00638016	1.02101e-06	0.00327032	down	ENSG00000286192;ENSG00000122687	NA;MRM2	protein_coding;protein_coding	4	ENSG00000122687	MRM2	1
2	3449391	3449502	112	0.10348	-0.00600269	1.02576e-06	0.00327032	down	ENSG00000171853	TRAPPC12	protein_coding	194	ENSG00000171853	TRAPPC12	1
4	37881426	37881560	135	0.842957	0.00604817	1.04612e-06	0.00330596	up				9523	ENSG00000065882	TBC1D1	0
12	56681199	56681463	265	0.068084	-0.00472406	1.06428e-06	0.0033101	down	ENSG00000110958	PTGES3	protein_coding	6533	ENSG00000110958	PTGES3	0
4	2540191	2540425	235	0.799775	-0.00610004	1.0658e-06	0.0033101	down	ENSG00000063978;ENSG00000125386	RNF4;FAM193A	protein_coding;protein_coding	3543	ENSG00000125386	FAM193A	0
13	37057771	37057843	73	0.333658	-0.00995896	1.07667e-06	0.00331527	down	ENSG00000102710	SUPT20H	protein_coding	1588	ENSG00000102710	SUPT20H	0
12	130826287	130826544	258	0.528072	-0.0116062	1.09481e-06	0.00334255	down	ENSG00000111450	STX2	protein_coding	705	ENSG00000111450	STX2	1
15	65532481	65532557	77	0.774745	-0.00685596	1.10642e-06	0.00334961	down	ENSG00000074696	HACD3	protein_coding	1220	ENSG00000074696	HACD3	0
7	97549628	97549645	18	0.561684	0.0170718	1.13519e-06	0.00340809	up				49614	ENSG00000199475	RN7SKP104	0
17	57848535	57848777	243	0.0849644	-0.00371525	1.16893e-06	0.00348035	down	ENSG00000181610	MRPS23	protein_coding	1219	ENSG00000181610	MRPS23	0
5	150358526	150358611	86	0.0537998	-0.00319153	1.2083e-06	0.00356809	down	ENSG00000070814	TCOF1	protein_coding	742	ENSG00000070814	TCOF1	1
2	120349078	120349275	198	0.840814	-0.00404535	1.22791e-06	0.00359652	down	ENSG00000163083	INHBB	protein_coding	2941	ENSG00000163083	INHBB	0
5	179025841	179025979	139	0.94104	-0.00281575	1.25624e-06	0.00360715	down	ENSG00000234284	ZNF879	protein_coding	1402	ENSG00000234284	ZNF879	0
2	130838324	130838592	269	0.150083	-0.00565683	1.25792e-06	0.00360715	down	ENSG00000136002	ARHGEF4	protein_coding	868	ENSG00000136002	ARHGEF4	1
1	71901774	71901832	59	0.860398	0.00657902	1.27021e-06	0.00360715	up	ENSG00000172260	NEGR1	protein_coding	64761	ENSG00000228853	NEGR1-IT1	0
2	27355244	27355377	134	0.105142	-0.00441309	1.27159e-06	0.00360715	down	ENSG00000115207	GTF3C2	protein_coding	868	ENSG00000234072	NA	1
8	111097764	111097840	77	0.847343	0.00718713	1.28778e-06	0.00362454	up	ENSG00000253103	LINC01609	lncRNA	57391	ENSG00000253877	LINC01608	0
1	7772610	7772864	255	0.0486362	-0.00286143	1.34177e-06	0.00374722	down	ENSG00000049245	VAMP3	protein_coding	0	ENSG00000049245	VAMP3	1
1	9875124	9875225	102	0.597095	-0.0101348	1.35609e-06	0.00374891	down	ENSG00000178585	CTNNBIP1	protein_coding	2950	ENSG00000178585	CTNNBIP1	0
7	73558814	73558870	57	0.142855	-0.00668386	1.36483e-06	0.00374891	down				1123	ENSG00000106635	BCL7B	0
9	128125998	128126129	132	0.727429	-0.0081453	1.37359e-06	0.00374891	down	ENSG00000148334	PTGES2	protein_coding	716	ENSG00000148334	PTGES2	1
19	2238184	2238318	135	0.640478	-0.00740559	1.42756e-06	0.00386691	down	ENSG00000104897	SF3A2	protein_coding	389	ENSG00000104897	SF3A2	1
1	159077329	159077374	46	0.888412	0.00637892	1.51434e-06	0.00406078	up	ENSG00000163568	AIM2	protein_coding	562	ENSG00000163568	AIM2	1
16	4765670	4765865	196	0.594998	-0.0133534	1.53451e-06	0.00406078	down	ENSG00000103199	ZNF500	protein_coding	138	ENSG00000103199	ZNF500	1
4	7045328	7045452	125	0.518059	-0.0108785	1.55704e-06	0.00406078	down	ENSG00000245748;ENSG00000173011	NA;TADA2B	lncRNA;protein_coding	778	ENSG00000245748	NA	1
12	132615109	132615164	56	0.462226	-0.00883401	1.55724e-06	0.00406078	down				3611	ENSG00000187848	P2RX2	0
22	50698753	50698826	74	0.644032	-0.0103648	1.55959e-06	0.00406078	down	ENSG00000251322	SHANK3	protein_coding	753	ENSG00000251322	SHANK3	1
19	49073905	49074047	143	0.561946	-0.0108006	1.56676e-06	0.00406078	down				1205	ENSG00000104848	KCNA7	0
18	66545139	66545273	135	0.8297	0.00744388	1.60376e-06	0.00412698	up	ENSG00000071991	CDH19	protein_coding	26897	ENSG00000071991	CDH19	0
9	129711598	129711778	181	0.880393	-0.00404294	1.62216e-06	0.00412783	down	ENSG00000167157	PRRX2	protein_coding	6856	ENSG00000236024	PRRX2-AS1	0
8	142511984	142512018	35	0.88287	-0.00374709	1.627e-06	0.00412783	down	ENSG00000181790	ADGRB1	protein_coding	31482	ENSG00000181790	ADGRB1	0
15	78871224	78871398	175	0.175609	-0.00733628	1.6671e-06	0.00417869	down	ENSG00000185787	MORF4L1	protein_coding	1415	ENSG00000185787	MORF4L1	0
8	38032137	38032149	13	0.197352	-0.00796402	1.67025e-06	0.00417869	down	ENSG00000187840	EIF4EBP1	protein_coding	1602	ENSG00000187840	EIF4EBP1	0
10	103369943	103370100	158	0.169398	-0.00759756	1.70926e-06	0.0042468	down	ENSG00000148835	TAF5	protein_coding	1952	ENSG00000148835	TAF5	0
9	137457846	137457970	125	0.253965	-0.00982138	1.74408e-06	0.00430364	down	ENSG00000165802	NSMF	protein_coding	1331	ENSG00000165802	NSMF	0
4	161777950	161778020	71	0.831231	0.00869691	1.7642e-06	0.00432367	up	ENSG00000168843	FSTL5	protein_coding	113045	ENSG00000168843	FSTL5	0
6	30722367	30722429	63	0.0422961	-0.00316004	1.82881e-06	0.00445173	down	ENSG00000196230	TUBB	protein_coding	667	ENSG00000196230	TUBB	1
1	200864274	200864409	136	0.837961	0.00637104	1.8544e-06	0.00447083	up				465	ENSG00000231333	RPL34P6	1
14	30893244	30893448	205	0.719949	0.0109563	1.86148e-06	0.00447083	up	ENSG00000100473	COCH	protein_coding	3435	ENSG00000258525	NA	0
17	74214641	74214674	34	0.191067	-0.00734074	1.9334e-06	0.00461283	down	ENSG00000141540	TTYH2	protein_coding	941	ENSG00000141540	TTYH2	1
12	53178916	53179149	234	0.0950128	-0.00480428	2.00373e-06	0.00474918	down	ENSG00000139631	CSAD	protein_coding	1446	ENSG00000139631	CSAD	0
13	27974895	27974955	61	0.0917112	-0.00401299	2.0739e-06	0.00488335	down				5579	ENSG00000165556	CDX2	0
1	20695683	20695744	62	0.268756	-0.013406	2.11812e-06	0.0049551	down	ENSG00000117245	KIF17	protein_coding	1669	ENSG00000235432	NA	0
17	82736754	82736772	19	0.134199	-0.0090357	2.13677e-06	0.00496647	down	ENSG00000167363	FN3K	protein_coding	681	ENSG00000167363	FN3K	1
9	36165207	36165230	24	0.675492	-0.0101613	2.18177e-06	0.00502499	down				4157	ENSG00000185972	CCIN	0
19	3698928	3699301	374	0.198754	-0.00769565	2.19229e-06	0.00502499	down	ENSG00000186111	PIP5K1C	protein_coding	1088	ENSG00000186111	PIP5K1C	0
4	7065922	7066110	189	0.686122	-0.00687354	2.20379e-06	0.00502499	down	ENSG00000109519	GRPEL1	protein_coding	1436	ENSG00000109519	GRPEL1	0
6	169640175	169640197	23	0.594212	-0.0172299	2.24811e-06	0.00507198	down	ENSG00000285733;ENSG00000184465	NA;WDR27	protein_coding;protein_coding	9035	ENSG00000184465	WDR27	0
14	103564618	103564741	124	0.260714	-0.0105161	2.25256e-06	0.00507198	down	ENSG00000126214;ENSG00000256053;ENSG00000256500	KLC1;COA8;NA	protein_coding;protein_coding;protein_coding	1310	ENSG00000256053	COA8	0
9	137789545	137789677	133	0.0938313	-0.00617153	2.27971e-06	0.00507496	down	ENSG00000181090	EHMT1	protein_coding	309	ENSG00000255585	NA	1
7	100051530	100051590	61	0.0537156	-0.00465764	2.28424e-06	0.00507496	down	ENSG00000166529	ZSCAN21	protein_coding	1735	ENSG00000166529	ZSCAN21	0
3	176823008	176823039	32	0.71754	0.0150921	2.30258e-06	0.00507496	up	ENSG00000223715	LINC01208	lncRNA	6006	ENSG00000228308	LINC01209	0
19	47115702	47116043	342	0.176389	-0.00840767	2.31023e-06	0.00507496	down	ENSG00000142230	SAE1	protein_coding	1925	ENSG00000130749	ZC3H4	0
19	47769385	47769443	59	0.896388	0.00538506	2.33121e-06	0.00507624	up				544	ENSG00000269656	NOP53-AS1	1
1	35558765	35558839	75	0.130185	-0.00673398	2.34492e-06	0.00507624	down	ENSG00000020129	NCDN	protein_coding	258	ENSG00000020129	NCDN	1
19	12697755	12697889	135	0.0643066	-0.00320027	2.35308e-06	0.00507624	down				1123	ENSG00000132004	FBXW9	0
9	130185773	130185963	191	0.759746	-0.00924587	2.39413e-06	0.00513405	down	ENSG00000107130	NCS1	protein_coding	7864	ENSG00000107130	NCS1	0
5	179428512	179428674	163	0.481567	-0.0126794	2.4438e-06	0.00520956	down				26740	ENSG00000250674	NA	0
19	14434580	14434671	92	0.639463	-0.011329	2.48012e-06	0.00525589	down	ENSG00000123143	PKN1	protein_coding	1086	ENSG00000123143	PKN1	0
14	39101953	39102060	108	0.0330093	-0.00315535	2.54182e-06	0.00535513	down	ENSG00000100934	SEC23A	protein_coding	1079	ENSG00000258651	SEC23A-AS1	0
19	1478271	1478386	116	0.0943724	-0.00393939	2.66263e-06	0.00552729	down	ENSG00000119559	C19orf25	protein_coding	510	ENSG00000119559	C19orf25	1
20	58307669	58307761	93	0.128568	-0.00916305	2.66488e-06	0.00552729	down	ENSG00000124224	PPP4R1L	transcribed_unprocessed_pseudogene	1671	ENSG00000124224	PPP4R1L	0
14	64302279	64302483	205	0.896889	0.00339989	2.66956e-06	0.00552729	up	ENSG00000140009	ESR2	protein_coding	7868	ENSG00000140009	ESR2	0
11	47588273	47588385	113	0.740928	-0.00729908	2.70936e-06	0.00557764	down	ENSG00000196666	FAM180B	protein_coding	1594	ENSG00000196666	FAM180B	0
22	50605343	50605431	89	0.71287	-0.00809965	2.74446e-06	0.00558625	down	ENSG00000008735	MAPK8IP2	protein_coding	2209	ENSG00000008735	MAPK8IP2	0
16	84259334	84259402	69	0.103742	-0.00484586	2.74455e-06	0.00558625	down	ENSG00000260858	NA	lncRNA	1646	ENSG00000260858	NA	0
14	80599433	80599566	134	0.829137	0.00938685	2.79734e-06	0.0056617	up	ENSG00000100629	CEP128	protein_coding	19007	ENSG00000100629	CEP128	0
1	16442224	16442274	51	0.258206	-0.011126	2.81952e-06	0.00566561	down	ENSG00000157191	NECAP2	protein_coding	1451	ENSG00000157191	NECAP2	0
5	173236358	173236411	54	0.186995	-0.00871991	2.8409e-06	0.00566561	down				1046	ENSG00000183072	NKX2-5	0
6	139185423	139185558	136	0.782389	0.00590549	2.84645e-06	0.00566561	up	ENSG00000231329;ENSG00000272446	NA;NA	lncRNA;lncRNA	50342	ENSG00000112406	HECA	0
20	63496042	63496348	307	0.554715	-0.0104775	2.8658e-06	0.00567279	down	ENSG00000101210	EEF1A2	protein_coding	2399	ENSG00000101210	EEF1A2	0
16	701546	701781	236	0.583118	-0.00808	2.88643e-06	0.00568241	down	ENSG00000127585	FBXL16	protein_coding	4019	ENSG00000127585	FBXL16	0
22	46803312	46803509	198	0.728998	-0.00753996	2.90684e-06	0.00569149	down	ENSG00000054611	TBC1D22A	protein_coding	29384	ENSG00000054611	TBC1D22A	0
8	904129	904184	56	0.59196	-0.0138969	2.93723e-06	0.00570208	down	ENSG00000198010	DLGAP2	protein_coding	11016	ENSG00000282759	NA	0
5	180128402	180128452	51	0.578307	-0.0109257	2.95102e-06	0.00570208	down	ENSG00000146090	RASGEF1C	protein_coding	6859	ENSG00000146090	RASGEF1C	0
10	66552064	66552203	140	0.78988	0.00918674	2.95981e-06	0.00570208	up	ENSG00000183230	CTNNA3	protein_coding	285253	ENSG00000277056	NA	0
9	121300582	121300651	70	0.371847	-0.0102786	2.97556e-06	0.00570208	down	ENSG00000148180	GSN	protein_coding	788	ENSG00000148180	GSN	1
16	28825519	28825553	35	0.385661	-0.0124267	3.02945e-06	0.00575914	down	ENSG00000168488	ATXN2L	protein_coding	147	ENSG00000168488	ATXN2L	1
11	118403624	118403650	27	0.0221504	-0.0036378	3.03731e-06	0.00575914	down	ENSG00000167283;ENSG00000285827	ATP5MG;NA	protein_coding;protein_coding	1728	ENSG00000254873	NA	0
2	232636971	232637044	74	0.83428	-0.00464254	3.08929e-06	0.00582703	down	ENSG00000115468	EFHD1	protein_coding	1096	ENSG00000115468	EFHD1	0
20	23989138	23989196	59	0.451431	-0.00921482	3.21082e-06	0.00602472	down				95	ENSG00000167390	POM121L3P	1
3	69011423	69011454	32	0.747144	-0.00652137	3.25944e-06	0.00605691	down	ENSG00000163378	EOGT	protein_coding	1576	ENSG00000163378	EOGT	0
22	39318407	39318427	21	0.107738	-0.00903621	3.2616e-06	0.00605691	down	ENSG00000100316	RPL3	protein_coding	186	ENSG00000100316	RPL3	1
17	40355289	40355450	162	0.747988	-0.00777655	3.28879e-06	0.00607608	down	ENSG00000131759	RARA	protein_coding	3901	ENSG00000131759	RARA	0
19	17946722	17946930	209	0.117612	-0.0038556	3.3193e-06	0.00610116	down				4362	ENSG00000105642	KCNN1	0
16	4801255	4801619	365	0.0535908	-0.0025476	3.34007e-06	0.00610818	down	ENSG00000285952;ENSG00000067836	NA;ROGDI	lncRNA;protein_coding	0	ENSG00000067836	ROGDI	1
9	129500449	129500534	86	0.531198	-0.00946616	3.38053e-06	0.00615094	down	ENSG00000204054	LINC00963	lncRNA	1455	ENSG00000204054	LINC00963	0
22	50199372	50199551	180	0.733003	-0.00601408	3.40048e-06	0.00615614	down	ENSG00000170638;ENSG00000273253	TRABD;NA	protein_coding;lncRNA	1285	ENSG00000273253	NA	0
1	11648235	11648321	87	0.722201	-0.00814344	3.42464e-06	0.00616888	down	ENSG00000116661	FBXO2	protein_coding	2391	ENSG00000116661	FBXO2	0
1	20365461	20365501	41	0.518353	-0.00905098	3.49467e-06	0.00625792	down	ENSG00000236963	LINC01141	lncRNA	32542	ENSG00000158816	VWA5B1	0
16	46845312	46845448	137	0.18051	-0.00728111	3.5088e-06	0.00625792	down				693	ENSG00000260889	CKBP1	1
8	228184	228234	51	0.571702	-0.0115841	3.57676e-06	0.0063477	down	ENSG00000223508	RPL23AP53	transcribed_processed_pseudogene	3902	ENSG00000172748	ZNF596	0
16	30067464	30067679	216	0.710765	-0.00824455	3.59837e-06	0.00635474	down	ENSG00000285043;ENSG00000149925	NA;ALDOA	protein_coding;protein_coding	0	ENSG00000149925	ALDOA	1
15	74783454	74783479	26	0.340935	-0.00991085	3.63353e-06	0.00638553	down	ENSG00000103653	CSK	protein_coding	848	ENSG00000103653	CSK	1
19	8512906	8513256	351	0.0375215	-0.00189739	3.70252e-06	0.00646598	down	ENSG00000133250	ZNF414	protein_coding	491	ENSG00000133250	ZNF414	1
11	64637454	64637461	8	0.390001	-0.012859	3.72801e-06	0.00646598	down	ENSG00000110076	NRXN2	protein_coding	8	ENSG00000110076	NRXN2	1
11	451832	452177	346	0.511586	-0.0103025	3.73315e-06	0.00646598	down	ENSG00000174915	PTDSS2	protein_coding	1380	ENSG00000174915	PTDSS2	0
2	27354612	27354756	145	0.628171	-0.0101597	3.76739e-06	0.00649407	down	ENSG00000115207	GTF3C2	protein_coding	1489	ENSG00000234072	NA	0
19	17076779	17076939	161	0.0669639	-0.00302502	3.88206e-06	0.00665986	down	ENSG00000099331	MYO9B	protein_coding	992	ENSG00000099331	MYO9B	1
17	43422252	43422390	139	0.747787	0.00945426	3.92451e-06	0.00670078	up				9824	ENSG00000251763	RNU6-470P	0
12	53296569	53296709	141	0.197537	-0.00698056	3.96494e-06	0.00673787	down	ENSG00000123349;ENSG00000288663	PFDN5;NA	protein_coding;lncRNA	520	ENSG00000123349	PFDN5	1
14	100569865	100569986	122	0.28825	-0.0132458	3.98781e-06	0.00674492	down	ENSG00000183092	BEGAIN	protein_coding	70	ENSG00000183092	BEGAIN	1
8	140491194	140491389	196	0.196482	-0.00412527	4.13075e-06	0.00687343	down				16653	ENSG00000259891	NA	0
11	46699426	46699480	55	0.104906	-0.00415381	4.13655e-06	0.00687343	down	ENSG00000175220	ARHGAP1	protein_coding	1122	ENSG00000175220	ARHGAP1	0
5	138133261	138133401	141	0.819312	0.0106681	4.14856e-06	0.00687343	up	ENSG00000112981	NME5	protein_coding	3825	ENSG00000112981	NME5	0
17	42555703	42555838	136	0.780463	-0.00598438	4.15445e-06	0.00687343	down	ENSG00000266929	NA	lncRNA	954	ENSG00000266962	HSD17B1-AS1	1
3	47421290	47421385	96	0.78507	-0.00571464	4.16538e-06	0.00687343	down	ENSG00000114650	SCAP	protein_coding	0	ENSG00000114650	SCAP	1
19	1079361	1079459	99	0.341223	-0.00905637	4.17826e-06	0.00687343	down	ENSG00000180448	ARHGAP45	protein_coding	1873	ENSG00000180448	ARHGAP45	0
17	37510467	37510569	103	0.881456	0.00392963	4.21638e-06	0.0068916	up	ENSG00000276023	DUSP14	protein_coding	587	ENSG00000276023	DUSP14	1
19	6501293	6501508	216	0.400982	-0.0104261	4.22756e-06	0.0068916	down	ENSG00000104833	TUBB4A	protein_coding	278	ENSG00000104833	TUBB4A	1
3	50157196	50157293	98	0.568873	-0.0144137	4.30506e-06	0.00694742	down	ENSG00000001617	SEMA3F	protein_coding	1110	ENSG00000235016	SEMA3F-AS1	0
19	47258550	47258653	104	0.292189	-0.0104762	4.30776e-06	0.00694742	down	ENSG00000105321	CCDC9	protein_coding	460	ENSG00000105321	CCDC9	1
22	37485116	37485506	391	0.931268	-0.00203346	4.31966e-06	0.00694742	down	ENSG00000100060	MFNG	protein_coding	486	ENSG00000100060	MFNG	1
6	106169169	106169178	10	0.720184	0.00969954	4.39327e-06	0.0070344	up	ENSG00000057663	ATG5	protein_coding	33250	ENSG00000057663	ATG5	0
17	81385513	81385615	103	0.802344	-0.00742933	4.5009e-06	0.00717485	down				48	ENSG00000262223	NA	1
11	1310982	1311057	76	0.0497689	-0.00304283	4.56798e-06	0.00721807	down				1212	ENSG00000255153	TOLLIP-DT	0
14	73758180	73758240	61	0.201476	-0.00834016	4.56808e-06	0.00721807	down	ENSG00000156030	MIDEAS	protein_coding	506	ENSG00000264741	MIR4505	1
6	47120064	47120114	51	0.233387	-0.00791336	4.59724e-06	0.00722184	down				77713	ENSG00000153292	ADGRF1	0
8	2653573	2653713	141	0.789335	0.00953143	4.61465e-06	0.00722184	up	ENSG00000254319	NA	lncRNA	30190	ENSG00000277526	NA	0
19	39127325	39127430	106	0.559861	-0.0101963	4.6306e-06	0.00722184	down	ENSG00000130669	PAK4	protein_coding	1490	ENSG00000130669	PAK4	0
15	40369580	40369729	150	0.94469	-0.00189866	4.67642e-06	0.00726185	down	ENSG00000140323;ENSG00000259368	DISP2;NA	protein_coding;lncRNA	0	ENSG00000259368	NA	1
16	789533	789706	174	0.810779	-0.00523169	4.83696e-06	0.00747892	down	ENSG00000127586	CHTF18	protein_coding	213	ENSG00000127586	CHTF18	1
5	77685025	77685234	210	0.74274	0.00974251	4.90373e-06	0.00754975	up				9042	ENSG00000171530	TBCA	0
8	82886130	82886185	56	0.459854	0.014544	4.95065e-06	0.00758956	up	ENSG00000254394;ENSG00000253836	NA;NA	lncRNA;lncRNA	25918	ENSG00000254394	NA	0
22	31214059	31214113	55	0.67988	-0.00860253	4.98163e-06	0.00760469	down	ENSG00000182541	LIMK2	protein_coding	1760	ENSG00000182541	LIMK2	0
5	106459200	106459269	70	0.689858	0.0133145	5.03507e-06	0.00765384	up				41958	ENSG00000251204	NA	0
9	124774684	124774717	34	0.274089	-0.0103138	5.0761e-06	0.00768268	down				2415	ENSG00000185585	OLFML2A	0
11	33131568	33131709	142	0.845763	0.00967209	5.14171e-06	0.00768268	up	ENSG00000176102	CSTF3	protein_coding	29711	ENSG00000176102	CSTF3	0
19	49021075	49021126	52	0.73751	-0.00865499	5.16013e-06	0.00768268	down				551	ENSG00000268655	NA	1
19	8510012	8510260	249	0.215683	-0.00519295	5.16888e-06	0.00768268	down	ENSG00000133250	ZNF414	protein_coding	1438	ENSG00000133250	ZNF414	0
13	52482275	52482275	1	0.710739	0.0117656	5.1799e-06	0.00768268	up				2404	ENSG00000235660	LINC00345	0
17	30712812	30712832	21	0.753679	-0.00901868	5.20165e-06	0.00768268	down	ENSG00000264538	SUZ12P1	transcribed_unprocessed_pseudogene	3203	ENSG00000264538	SUZ12P1	0
1	46488363	46488487	125	0.530299	-0.0105209	5.20332e-06	0.00768268	down				1348	ENSG00000197587	DMBX1	0
1	65604611	65604666	56	0.801067	0.00971947	5.2542e-06	0.00772614	up	ENSG00000116678	LEPR	protein_coding	15273	ENSG00000116678	LEPR	0
5	177673438	177673481	44	0.287049	-0.0125686	5.34208e-06	0.00782344	down				1228	ENSG00000246596	NA	0
17	16437870	16437993	124	0.170073	-0.00600501	5.4054e-06	0.00788412	down				773	ENSG00000175061	SNHG29	1
16	28825636	28825702	67	0.312396	-0.0137042	5.46577e-06	0.00791261	down	ENSG00000168488	ATXN2L	protein_coding	67	ENSG00000168488	ATXN2L	1
6	30671379	30671387	9	0.196193	-0.013148	5.4874e-06	0.00791261	down	ENSG00000204560	DHX16	protein_coding	1600	ENSG00000204560	DHX16	0
19	30670666	30670787	122	0.222916	-0.00907428	5.52699e-06	0.00791261	down	ENSG00000198597	ZNF536	protein_coding	2018	ENSG00000267760	NA	0
11	696939	697004	66	0.0744625	-0.00471978	5.53113e-06	0.00791261	down	ENSG00000177030;ENSG00000177106;ENSG00000177042	DEAF1;EPS8L2;TMEM80	protein_coding;protein_coding;protein_coding	1122	ENSG00000177042	TMEM80	0
16	75827821	75827835	15	0.786866	0.00939632	5.55574e-06	0.00791261	up				32996	ENSG00000261313	NA	0
19	46690622	46690686	65	0.91202	-0.00471723	5.55671e-06	0.00791261	down	ENSG00000105287	PRKD2	protein_coding	912	ENSG00000105287	PRKD2	1
19	7942203	7942258	56	0.607429	-0.0106146	5.66814e-06	0.0080395	down	ENSG00000104980	TIMM44	protein_coding	1376	ENSG00000104980	TIMM44	0
8	11771684	11771845	162	0.526618	-0.00735112	5.7218e-06	0.00808378	down	ENSG00000154328	NEIL2	protein_coding	1973	ENSG00000154328	NEIL2	0
9	137149828	137149900	73	0.208005	-0.00835674	5.74628e-06	0.00808666	down	ENSG00000176884	GRIN1	protein_coding	818	ENSG00000176884	GRIN1	1
20	3094298	3094398	101	0.391587	-0.0092917	5.85315e-06	0.008205	down	ENSG00000263905	RN7SL555P	misc_RNA	126	ENSG00000263905	RN7SL555P	1
19	17968151	17968238	88	0.233457	-0.00829523	5.89389e-06	0.00823009	down	ENSG00000105642	KCNN1	protein_coding	951	ENSG00000105642	KCNN1	1
17	15259663	15259717	55	0.771151	-0.00772686	5.95324e-06	0.00828086	down	ENSG00000109099	PMP22	protein_coding	250	ENSG00000109099	PMP22	1
1	9233437	9233586	150	0.586585	-0.0110528	5.97749e-06	0.00828262	down				1187	ENSG00000049239	H6PD	0
12	57783641	57783912	272	0.0283278	-0.00197953	6.0153e-06	0.00830308	down	ENSG00000257921;ENSG00000123297	NA;TSFM	protein_coding;protein_coding	759	ENSG00000123297	TSFM	1
19	38564610	38564676	67	0.172819	-0.00524272	6.0501e-06	0.00831923	down	ENSG00000196218	RYR1	protein_coding	722	ENSG00000196218	RYR1	1
1	16760541	16760642	102	0.235757	-0.0051706	6.07728e-06	0.00832483	down	ENSG00000058453;ENSG00000186715	CROCC;MST1L	protein_coding;transcribed_unprocessed_pseudogene	1249	ENSG00000186715	MST1L	0
1	16646845	16646929	85	0.379114	-0.00657508	6.15333e-06	0.00839708	down	ENSG00000215908;ENSG00000186301	CROCCP2;MST1P2	transcribed_unprocessed_pseudogene;unprocessed_pseudogene	1222	ENSG00000186301	MST1P2	0
19	56119718	56120025	308	0.101426	-0.00471744	6.18931e-06	0.00841431	down	ENSG00000142409	ZNF787	protein_coding	1224	ENSG00000142409	ZNF787	0
8	143016300	143016309	10	0.435363	-0.0146174	6.29683e-06	0.00852555	down	ENSG00000247317	LY6E-DT	lncRNA	1672	ENSG00000160932	LY6E	0
11	429936	430136	201	0.851574	-0.00647322	6.31967e-06	0.00852555	down	ENSG00000185101	ANO9	protein_coding	0	ENSG00000185101	ANO9	1
11	2264759	2264861	103	0.953283	-0.00190373	6.34213e-06	0.00852555	down				5726	ENSG00000183734	ASCL2	0
5	171394408	171394470	63	0.953301	-0.00355727	6.41669e-06	0.00856559	down	ENSG00000181163	NPM1	protein_coding	4690	ENSG00000181163	NPM1	0
1	2134935	2135277	343	0.869928	-0.00452799	6.41947e-06	0.00856559	down	ENSG00000067606	PRKCZ	protein_coding	0	ENSG00000067606	PRKCZ	1
19	14556775	14556878	104	0.423617	-0.0124807	6.52273e-06	0.00867127	down	ENSG00000132002;ENSG00000099797	DNAJB1;TECR	protein_coding;protein_coding	3383	ENSG00000132002	DNAJB1	0
8	142447522	142447770	249	0.48739	-0.00891845	6.59864e-06	0.00873993	down				1659	ENSG00000181790	ADGRB1	0
1	3322311	3322381	71	0.475893	-0.00870236	6.63487e-06	0.00875573	down	ENSG00000142611;ENSG00000287828	PRDM16;NA	protein_coding;lncRNA	767	ENSG00000287828	NA	1
17	19744120	19744558	439	0.0419546	-0.00196595	6.66023e-06	0.00875711	down	ENSG00000108602	ALDH3A1	protein_coding	574	ENSG00000108602	ALDH3A1	1
11	75888233	75888295	63	0.29071	-0.00863822	6.70527e-06	0.00878427	down	ENSG00000198382	UVRAG	protein_coding	9828	ENSG00000198382	UVRAG	0
7	55570664	55570799	136	0.0740717	-0.00362685	6.7693e-06	0.00881232	down	ENSG00000154978	VOPP1	protein_coding	1068	ENSG00000154978	VOPP1	0
16	88077447	88077486	40	0.718413	-0.0110884	6.7756e-06	0.00881232	down				6373	ENSG00000172530	BANP	0
19	1315286	1315388	103	0.630574	-0.00756791	6.80475e-06	0.00881741	down				5836	ENSG00000267372	NA	0
11	65782432	65782451	20	0.399806	-0.00938191	6.82847e-06	0.00881741	down				1455	ENSG00000254470	AP5B1	0
19	2075812	2075851	40	0.287607	-0.0118575	6.86627e-06	0.00883456	down	ENSG00000172081	MOB3A	protein_coding	2867	ENSG00000172081	MOB3A	0
2	152264603	152264778	176	0.769271	0.00732062	6.97566e-06	0.00894337	up				19681	ENSG00000199884	Y_RNA	0
17	19743690	19743862	173	0.446157	-0.0088489	7.19867e-06	0.00917615	down	ENSG00000108602	ALDH3A1	protein_coding	189	ENSG00000108602	ALDH3A1	1
8	6807001	6807035	35	0.491461	-0.0154969	7.21997e-06	0.00917615	down				26126	ENSG00000287747	NA	0
19	3313752	3313805	54	0.671449	-0.00855071	7.25322e-06	0.00917615	down				597	ENSG00000141905	NFIC	1
2	79609479	79609500	22	0.760823	0.0117227	7.25911e-06	0.00917615	up	ENSG00000066032	CTNNA2	protein_coding	25040	ENSG00000066032	CTNNA2	0
5	1927799	1928011	213	0.718602	-0.00616627	7.45704e-06	0.00936079	down				3052	ENSG00000248994	NA	0
4	3642879	3642989	111	0.224181	-0.00803202	7.45714e-06	0.00936079	down				9849	ENSG00000250681	NA	0
12	120727020	120727116	97	0.667693	-0.00817444	7.49392e-06	0.00937429	down	ENSG00000122971	ACADS	protein_coding	1158	ENSG00000122971	ACADS	0
12	121453750	121454010	261	0.318682	-0.00948736	7.56217e-06	0.00937665	down	ENSG00000089094	KDM2B	protein_coding	9397	ENSG00000284402	MIR7107	0
19	3225996	3226127	132	0.349307	-0.00908988	7.5677e-06	0.00937665	down	ENSG00000161082	CELF5	protein_coding	510	ENSG00000161082	CELF5	1
13	78378629	78378821	193	0.838982	0.00648569	7.58581e-06	0.00937665	up	ENSG00000234377	OBI1-AS1	lncRNA	23300	ENSG00000200686	RNY3P3	0
12	130880064	130880096	33	0.839364	0.00973389	7.6197e-06	0.00937665	up				6960	ENSG00000132341	RAN	0
2	241866621	241866700	80	0.643124	-0.00938278	7.6699e-06	0.00937665	down				2899	ENSG00000188011	RTP5	0
17	4744835	4744921	87	0.448029	-0.0133116	7.67505e-06	0.00937665	down	ENSG00000141497	ZMYND15	protein_coding	1087	ENSG00000141497	ZMYND15	0
2	26036327	26036383	57	0.0225445	-0.00226514	7.67799e-06	0.00937665	down	ENSG00000084733	RAB10	protein_coding	2219	ENSG00000084733	RAB10	0
1	12615964	12616042	79	0.35666	-0.0111867	7.70629e-06	0.00937941	down	ENSG00000162496	DHRS3	protein_coding	653	ENSG00000162496	DHRS3	1
7	101238809	101239006	198	0.859177	-0.00424932	7.75686e-06	0.00940643	down	ENSG00000106404	CLDN15	protein_coding	0	ENSG00000106404	CLDN15	1
12	95848148	95848285	138	0.885963	0.00474478	7.81985e-06	0.00940643	up	ENSG00000258343	SNRPF-DT	lncRNA	10407	ENSG00000258343	SNRPF-DT	0
16	88187379	88187536	158	0.48962	-0.00813509	7.83133e-06	0.00940643	down	ENSG00000260420	LINC02182	lncRNA	449	ENSG00000261327	NA	1
7	100829148	100829429	282	0.556859	-0.00845699	7.83293e-06	0.00940643	down	ENSG00000146828	SLC12A9	protein_coding	1624	ENSG00000196411	EPHB4	0
11	64301801	64301967	167	0.466564	-0.00535635	7.93638e-06	0.00946098	down	ENSG00000257069;ENSG00000219435	KCNK4-TEX40;CATSPERZ	lncRNA;protein_coding	1354	ENSG00000219435	CATSPERZ	0
17	28947144	28947277	134	0.875341	-0.00421166	7.93943e-06	0.00946098	down	ENSG00000109118	PHF12	protein_coding	2347	ENSG00000265908	NA	0
6	129331029	129331172	144	0.727449	0.014833	7.95713e-06	0.00946098	up	ENSG00000196569	LAMA2	protein_coding	11210	ENSG00000196569	LAMA2	0
1	32466389	32466449	61	0.363833	-0.0101943	8.02391e-06	0.0095061	down	ENSG00000254553;ENSG00000273274	NA;ZBTB8B	protein_coding;protein_coding	1316	ENSG00000273274	ZBTB8B	0
1	90252828	90252962	135	0.079863	-0.00324599	8.06099e-06	0.0095061	down	ENSG00000287406	NA	lncRNA	596	ENSG00000212459	RNU6-695P	1
16	89815197	89815333	137	0.182956	-0.00561293	8.07424e-06	0.0095061	down	ENSG00000187741	FANCA	protein_coding	644	ENSG00000187741	FANCA	1
14	104139956	104140094	139	0.403648	-0.0127285	8.15167e-06	0.009566	down	ENSG00000066735	KIF26A	protein_coding	915	ENSG00000066735	KIF26A	1
19	45779254	45779373	120	0.166687	-0.0117321	8.23047e-06	0.00961366	down	ENSG00000104936	DMPK	protein_coding	0	ENSG00000104936	DMPK	1
6	170134124	170134197	74	0.409761	-0.0170851	8.25981e-06	0.00961366	down				1176	ENSG00000288162	NA	0
19	10545227	10545343	117	0.141339	-0.00546273	8.29277e-06	0.00961366	down	ENSG00000130734	ATG4D	protein_coding	106	ENSG00000130734	ATG4D	1
19	3492667	3492668	2	0.48375	-0.0167655	8.29903e-06	0.00961366	down	ENSG00000129932	DOHH	protein_coding	1502	ENSG00000129932	DOHH	0
19	14202996	14202996	1	0.802517	-0.0110063	8.33746e-06	0.00962722	down	ENSG00000072071	ADGRL1	protein_coding	3172	ENSG00000072071	ADGRL1	0
16	89562058	89562065	8	0.24653	-0.0125387	8.43573e-06	0.00966992	down	ENSG00000167526	RPL13	protein_coding	74	ENSG00000167526	RPL13	1
7	135237752	135237817	66	0.155612	-0.0083155	8.45785e-06	0.00966992	down	ENSG00000146857	STRA8	protein_coding	3913	ENSG00000146857	STRA8	0
14	61111565	61111607	43	0.0176103	-0.00166835	8.47495e-06	0.00966992	down				59678	ENSG00000139974	SLC38A6	0
18	21598558	21598677	120	0.229223	-0.00928116	8.5103e-06	0.00966992	down	ENSG00000141446	ESCO1	protein_coding	2026	ENSG00000141446	ESCO1	0
18	67098790	67098924	135	0.879917	0.00601929	8.51096e-06	0.00966992	up				17205	ENSG00000263354	MIR5011	0
19	1073590	1074010	421	0.558088	-0.00853909	8.54106e-06	0.00966992	down	ENSG00000180448	ARHGAP45	protein_coding	6	ENSG00000180448	ARHGAP45	1
4	39374644	39374827	184	0.463103	0.0125244	8.58774e-06	0.00966992	up				8268	ENSG00000035928	RFC1	0
20	35774175	35774367	193	0.100377	-0.00454675	8.60681e-06	0.00966992	down	ENSG00000025293	PHF20	protein_coding	2141	ENSG00000025293	PHF20	0
18	54341250	54341355	106	0.152317	0.00917518	8.61601e-06	0.00966992	up	ENSG00000174448	STARD6	protein_coding	16492	ENSG00000174448	STARD6	0
19	10297774	10297966	193	0.285528	-0.00685844	8.6861e-06	0.00969	down				6300	ENSG00000105376	ICAM5	0
6	729797	729861	65	0.887762	0.00575771	8.68768e-06	0.00969	up	ENSG00000271727;ENSG00000287293	NA;NA	lncRNA;lncRNA	18263	ENSG00000271727	NA	0
7	100825338	100825396	59	0.455481	-0.0130925	8.83228e-06	0.00982087	down	ENSG00000196411	EPHB4	protein_coding	129	ENSG00000196411	EPHB4	1
14	47915137	47915242	106	0.407147	0.00844223	8.86606e-06	0.00982809	up				112935	ENSG00000259117	NA	0
19	18917528	18917659	132	0.472104	-0.00827051	8.91643e-06	0.00985361	down	ENSG00000105669;ENSG00000268193	COPE;NA	protein_coding;protein_coding	1694	ENSG00000105669	COPE	0
17	40142493	40142664	172	0.736297	-0.00641196	8.95195e-06	0.00986262	down	ENSG00000108349	CASC3	protein_coding	1650	ENSG00000108349	CASC3	0
17	42668850	42668964	115	0.717708	-0.00922553	9.01411e-06	0.00990081	down	ENSG00000068137	PLEKHH3	protein_coding	733	ENSG00000068137	PLEKHH3	1
19	823534	823694	161	0.4973	-0.0114593	9.06445e-06	0.00992585	down				1402	ENSG00000172232	AZU1	0
10	131903295	131903392	98	0.471179	-0.00996904	9.11609e-06	0.00995215	down	ENSG00000175470	PPP2R2D	protein_coding	2003	ENSG00000175470	PPP2R2D	0
19	47470717	47470873	157	0.54037	-0.00933108	9.22179e-06	0.0100317	down	ENSG00000118160;ENSG00000287896	SLC8A2;NA	protein_coding;lncRNA	806	ENSG00000287896	NA	1
17	82737019	82737077	59	0.466392	-0.0113178	9.24466e-06	0.0100317	down	ENSG00000167363	FN3K	protein_coding	946	ENSG00000167363	FN3K	1
1	45519932	45520130	199	0.431535	-0.00952654	9.32188e-06	0.0100851	down	ENSG00000117450	PRDX1	protein_coding	1723	ENSG00000117450	PRDX1	0
11	119320067	119320202	136	0.298668	-0.0106895	9.35933e-06	0.0100953	down	ENSG00000076706	MCAM	protein_coding	1175	ENSG00000076706	MCAM	0
X	119470382	119470447	66	0.551222	-0.0122775	9.43591e-06	0.0101248	down	ENSG00000005022	SLC25A5	protein_coding	119	ENSG00000005022	SLC25A5	1
11	61428822	61428850	29	0.0670681	-0.00530614	9.44291e-06	0.0101248	down	ENSG00000149532	CPSF7	protein_coding	369	ENSG00000256591	NA	1
19	1478091	1478135	45	0.228822	-0.00857757	9.51163e-06	0.0101683	down	ENSG00000119559	C19orf25	protein_coding	761	ENSG00000119559	C19orf25	1
11	67116514	67116654	141	0.184969	-0.00625704	9.68025e-06	0.0103046	down				2608	ENSG00000173120	KDM2A	0
9	25369618	25369676	59	0.699648	0.0118837	9.70557e-06	0.0103046	up				214595	ENSG00000287318	NA	0
19	48730197	48730259	63	0.343324	-0.0101391	9.725e-06	0.0103046	down	ENSG00000105538	RASIP1	protein_coding	4615	ENSG00000105538	RASIP1	0
14	88549946	88550134	189	0.212015	-0.00603091	9.78404e-06	0.0103368	down	ENSG00000070778	PTPN21	protein_coding	395	ENSG00000070778	PTPN21	1
11	66747182	66747232	51	0.507672	-0.0102731	9.92252e-06	0.0104524	down	ENSG00000173715	C11orf80	protein_coding	1161	ENSG00000173715	C11orf80	0
19	4052890	4052930	41	0.671072	-0.0111442	1.01308e-05	0.0106058	down	ENSG00000178951	ZBTB7A	protein_coding	9818	ENSG00000268670	NA	0
1	6234571	6234640	70	0.113236	-0.00624358	1.01756e-05	0.0106058	down	ENSG00000116237	ICMT	protein_coding	51	ENSG00000225077	LINC00337	1
19	3492910	3492996	87	0.511703	-0.0173066	1.01831e-05	0.0106058	down	ENSG00000129932	DOHH	protein_coding	1174	ENSG00000129932	DOHH	0
13	113298864	113299065	202	0.104676	-0.00433671	1.02054e-05	0.0106058	down	ENSG00000185896	LAMP1	protein_coding	1624	ENSG00000185896	LAMP1	0
17	51073047	51073185	139	0.929806	0.00255826	1.02153e-05	0.0106058	up	ENSG00000008294;ENSG00000249870	SPAG9;NA	protein_coding;lncRNA	6436	ENSG00000008294	SPAG9	0
6	30671219	30671268	50	0.32162	-0.0148494	1.03079e-05	0.010671	down	ENSG00000204560	DHX16	protein_coding	1719	ENSG00000204560	DHX16	0
17	42565514	42565800	287	0.91514	-0.00272892	1.03373e-05	0.010671	down	ENSG00000068120	COASY	protein_coding	51	ENSG00000068120	COASY	1
4	132809621	132809661	41	0.37439	0.0147541	1.03963e-05	0.0107012	up				172015	ENSG00000251488	NA	0
17	617083	617219	137	0.599162	-0.00862187	1.04298e-05	0.0107051	down	ENSG00000141252	VPS53	protein_coding	1080	ENSG00000262708	NA	0
16	30608440	30608509	70	0.630164	-0.0068452	1.05191e-05	0.0107661	down	ENSG00000260167;ENSG00000156853	NA;ZNF689	lncRNA;protein_coding	975	ENSG00000156853	ZNF689	1
19	18610613	18611012	400	0.0498078	-0.00272205	1.07134e-05	0.0109339	down	ENSG00000105696	TMEM59L	protein_coding	1857	ENSG00000105696	TMEM59L	0
12	53054059	53055146	1088	0.0242393	-0.000706261	1.07984e-05	0.0109733	down	ENSG00000257337;ENSG00000111077	NA;TNS2	lncRNA;protein_coding	0	ENSG00000257337	NA	1
7	146178194	146178329	136	0.94085	0.00249815	1.0813e-05	0.0109733	up	ENSG00000174469	CNTNAP2	protein_coding	30489	ENSG00000274127	NA	0
20	2875167	2875224	58	0.100677	-0.0059007	1.08863e-05	0.0110167	down	ENSG00000132670	PTPRA	protein_coding	1483	ENSG00000132670	PTPRA	0
13	69566705	69566750	46	0.510544	0.012573	1.09203e-05	0.0110202	up				157969	ENSG00000224640	SRSF1P1	0
9	133793132	133793245	114	0.846897	-0.00422193	1.10075e-05	0.0110505	down	ENSG00000160293	VAV2	protein_coding	53176	ENSG00000123453	SARDH	0
14	100728517	100728577	61	0.424654	-0.0135623	1.11276e-05	0.0110505	down	ENSG00000185559	DLK1	protein_coding	1486	ENSG00000185559	DLK1	0
7	15288116	15288185	70	0.797255	0.00916718	1.11636e-05	0.0110505	up	ENSG00000187546	AGMO	protein_coding	78001	ENSG00000187546	AGMO	0
17	58156343	58156545	203	0.0928013	-0.00287841	1.11815e-05	0.0110505	down	ENSG00000141194	OR4D1	protein_coding	482	ENSG00000229590	MSX2P1	1
8	143367450	143367466	17	0.33427	-0.00721097	1.11892e-05	0.0110505	down	ENSG00000254389	RHPN1-AS1	lncRNA	1081	ENSG00000254389	RHPN1-AS1	0
7	128408722	128408762	41	0.184749	-0.00755076	1.12008e-05	0.0110505	down	ENSG00000106348	IMPDH1	protein_coding	723	ENSG00000106348	IMPDH1	1
7	100269805	100269872	68	0.857479	-0.005557	1.12175e-05	0.0110505	down	ENSG00000239521	CASTOR3	transcribed_unprocessed_pseudogene	2110	ENSG00000239521	CASTOR3	0
10	100731553	100731618	66	0.0487374	-0.00369903	1.123e-05	0.0110505	down				3777	ENSG00000075891	PAX2	0
3	101773828	101773897	70	0.727584	0.0116399	1.129e-05	0.0110505	up				5304	ENSG00000144815	NXPE3	0
4	1710771	1710976	206	0.049311	-0.00242661	1.1302e-05	0.0110505	down	ENSG00000163950	SLBP	protein_coding	1041	ENSG00000163950	SLBP	0
16	64753159	64753159	1	0.551574	0.0150355	1.13089e-05	0.0110505	up				14835	ENSG00000260068	NA	0
19	52430267	52430312	46	0.824852	-0.00548344	1.13184e-05	0.0110505	down	ENSG00000198633	ZNF534	protein_coding	1079	ENSG00000198633	ZNF534	0
2	130731975	130731986	12	0.749737	0.0134828	1.13989e-05	0.011099	up				2904	ENSG00000173302	GPR148	0
5	161213616	161213623	8	0.490804	0.015373	1.14801e-05	0.0111314	up				191310	ENSG00000145864	GABRB2	0
16	64878840	64878840	1	0.677396	0.0102406	1.1503e-05	0.0111314	up				94108	ENSG00000140937	CDH11	0
3	125936889	125936944	56	0.700016	0.00687877	1.15248e-05	0.0111314	up	ENSG00000189366	ALG1L	transcribed_unprocessed_pseudogene	94	ENSG00000189366	ALG1L	1
10	119177518	119177584	67	0.408176	-0.0126471	1.16083e-05	0.0111692	down	ENSG00000165672	PRDX3	protein_coding	1227	ENSG00000165672	PRDX3	0
8	1749262	1749439	178	0.885657	-0.00243048	1.1626e-05	0.0111692	down				6338	ENSG00000182372	CLN8	0
22	42648549	42648569	21	0.190535	-0.00755089	1.17e-05	0.0112104	down	ENSG00000100243	CYB5R3	protein_coding	752	ENSG00000100243	CYB5R3	1
19	42132184	42132240	57	0.18934	-0.0094139	1.18269e-05	0.0113011	down	ENSG00000028277	POU2F2	protein_coding	150	ENSG00000028277	POU2F2	1
11	2888414	2888480	67	0.377508	-0.0100715	1.18677e-05	0.0113011	down	ENSG00000254827	SLC22A18AS	protein_coding	949	ENSG00000254827	SLC22A18AS	1
12	113246584	113246688	105	0.754067	-0.00929294	1.18888e-05	0.0113011	down	ENSG00000186815	TPCN1	protein_coding	2080	ENSG00000186815	TPCN1	0
18	67502339	67502350	12	0.868659	0.00779729	1.1948e-05	0.0113275	up				4238	ENSG00000263424	NA	0
6	31540520	31540542	23	0.309738	-0.0113962	1.20176e-05	0.0113512	down	ENSG00000254870;ENSG00000198563	ATP6V1G2-DDX39B;DDX39B	protein_coding;protein_coding	0	ENSG00000198563	DDX39B	1
6	95579297	95579330	34	0.120678	-0.00627833	1.2036e-05	0.0113512	down	ENSG00000172469	MANEA	protein_coding	1431	ENSG00000172469	MANEA	0
3	168964782	168964816	35	0.903526	0.00650435	1.21424e-05	0.0114066	up				36612	ENSG00000273177	NA	0
12	4698231	4698367	137	0.928348	0.00253779	1.21672e-05	0.0114066	up	ENSG00000255639	NA	protein_coding	13250	ENSG00000139180	NDUFA9	0
16	73879321	73879443	123	0.348512	0.0144334	1.21933e-05	0.0114066	up	ENSG00000140836	ZFHX3	protein_coding	12306	ENSG00000140836	ZFHX3	0
17	37408182	37408346	165	0.242604	-0.00804343	1.22214e-05	0.0114066	down	ENSG00000276234;ENSG00000273965	TADA2A;NA	protein_coding;lncRNA	247	ENSG00000273965	NA	1
14	49758205	49758237	33	0.493459	0.0143945	1.22663e-05	0.0114189	up				9892	ENSG00000165516	KLHDC2	0
1	16940325	16940684	360	0.121103	-0.00334359	1.2437e-05	0.011548	down	ENSG00000058453	CROCC	protein_coding	1415	ENSG00000058453	CROCC	0
10	103472500	103472637	138	0.380598	-0.00804737	1.25879e-05	0.0115898	down				6602	ENSG00000183128	CALHM3	0
1	74295997	74296104	108	0.855875	0.00655004	1.25923e-05	0.0115898	up	ENSG00000259030;ENSG00000116783	FPGT-TNNI3K;TNNI3K	protein_coding;protein_coding	40022	ENSG00000116783	TNNI3K	0
19	7864697	7864855	159	0.728186	-0.00784413	1.26004e-05	0.0115898	down	ENSG00000142459	EVI5L	protein_coding	4111	ENSG00000142459	EVI5L	0
1	15974735	15975031	297	0.0261352	-0.0013008	1.26115e-05	0.0115898	down	ENSG00000116809	ZBTB17	protein_coding	1047	ENSG00000116809	ZBTB17	0
14	100728411	100728440	30	0.561511	-0.0143578	1.26429e-05	0.0115898	down	ENSG00000185559	DLK1	protein_coding	1380	ENSG00000185559	DLK1	0
2	197501486	197501620	135	0.18609	-0.00673637	1.27321e-05	0.011642	down	ENSG00000144381;ENSG00000115541;ENSG00000270757	HSPD1;HSPE1;HSPE1-MOB4	protein_coding;protein_coding;protein_coding	603	ENSG00000115541	HSPE1	1
20	46211087	46211096	10	0.475836	-0.0102982	1.28683e-05	0.0117086	down	ENSG00000149654	CDH22	protein_coding	9752	ENSG00000149654	CDH22	0
12	130164551	130164721	171	0.08824	-0.00274923	1.28732e-05	0.0117086	down	ENSG00000111432	FZD10	protein_coding	2086	ENSG00000111432	FZD10	0
11	64034717	64034771	55	0.417848	-0.0124989	1.29025e-05	0.0117086	down	ENSG00000133315	MACROD1	protein_coding	1159	ENSG00000126500	FLRT1	0
11	28085344	28085355	12	0.733002	0.0136307	1.30484e-05	0.0117846	up	ENSG00000121621	KIF18A	protein_coding	3224	ENSG00000121621	KIF18A	0
X	1893920	1894168	249	0.964928	-0.00155066	1.30516e-05	0.0117846	down				126572	ENSG00000234622	NA	0
12	100344555	100344584	30	0.861394	0.00696549	1.33622e-05	0.0120195	up				8963	ENSG00000136021	SCYL2	0
1	110036174	110036228	55	0.0606087	-0.0039949	1.33986e-05	0.0120195	down	ENSG00000143093	STRIP1	protein_coding	1541	ENSG00000143093	STRIP1	0
19	11926369	11926482	114	0.0947852	-0.00294092	1.34709e-05	0.0120195	down	ENSG00000196757;ENSG00000267179	ZNF700;NA	protein_coding;protein_coding	1248	ENSG00000267179	NA	0
17	47734808	47734989	182	0.452797	-0.00848597	1.34729e-05	0.0120195	down	ENSG00000073861	TBX21	protein_coding	1382	ENSG00000073861	TBX21	0
7	157007619	157007678	60	0.604889	-0.00921283	1.34787e-05	0.0120195	down	ENSG00000130675	MNX1	protein_coding	1311	ENSG00000235029	MNX1-AS2	0
16	11669663	11669871	209	0.277179	-0.00733108	1.36472e-05	0.0121131	down	ENSG00000184602	SNN	protein_coding	1207	ENSG00000184602	SNN	0
14	91324733	91324795	63	0.813548	-0.00602572	1.36509e-05	0.0121131	down	ENSG00000015133	CCDC88C	protein_coding	8862	ENSG00000015133	CCDC88C	0
9	97575358	97575449	92	0.0814012	-0.00316043	1.378e-05	0.0121977	down	ENSG00000136842	TMOD1	protein_coding	19922	ENSG00000136842	TMOD1	0
10	117242825	117242874	50	0.496109	-0.0111863	1.38624e-05	0.0122402	down	ENSG00000165646	SLC18A2	protein_coding	826	ENSG00000225936	NA	1
8	42435838	42436003	166	0.418119	-0.011229	1.38959e-05	0.0122402	down	ENSG00000168575	SLC20A2	protein_coding	24164	ENSG00000168575	SLC20A2	0
9	77400549	77400685	137	0.778162	0.0067918	1.39878e-05	0.0122739	up	ENSG00000197969	VPS13A	protein_coding	5282	ENSG00000197969	VPS13A	0
16	6281347	6281405	59	0.660645	0.0108514	1.40124e-05	0.0122739	up	ENSG00000078328	RBFOX1	protein_coding	99070	ENSG00000286635	NA	0
10	27617122	27617258	137	0.936251	0.00330917	1.40364e-05	0.0122739	up				52691	ENSG00000285737	LINC02680	0
12	89581177	89581226	50	0.779446	0.010041	1.40706e-05	0.012274	up	ENSG00000258302	NA	lncRNA	20047	ENSG00000258302	NA	0
1	16168462	16168507	46	0.12151	-0.00464753	1.41435e-05	0.0122847	down				9195	ENSG00000224621	NA	0
11	118690409	118690563	155	0.0943058	-0.00510673	1.41511e-05	0.0122847	down	ENSG00000255239	TREHP1	unprocessed_pseudogene	35	ENSG00000255239	TREHP1	1
17	77110197	77110226	30	0.881445	-0.00559832	1.41876e-05	0.0122867	down	ENSG00000129657	SEC14L1	protein_coding	17646	ENSG00000129657	SEC14L1	0
22	28774313	28774359	47	0.22397	-0.00923416	1.42965e-05	0.0123514	down	ENSG00000159873	CCDC117	protein_coding	1071	ENSG00000159873	CCDC117	0
14	93112585	93112734	150	0.683706	-0.00779526	1.43835e-05	0.0123664	down	ENSG00000100605	ITPK1	protein_coding	2537	ENSG00000100605	ITPK1	0
11	2378975	2379091	117	0.412661	-0.00786868	1.43963e-05	0.0123664	down	ENSG00000110651	CD81	protein_coding	64	ENSG00000110651	CD81	1
13	112329935	112330247	313	0.0799177	-0.00283597	1.44168e-05	0.0123664	down	ENSG00000223626	LINC01044	lncRNA	977	ENSG00000223626	LINC01044	1
4	125249291	125249346	56	0.626214	0.0124115	1.45018e-05	0.0123884	up				65571	ENSG00000196159	FAT4	0
4	1722702	1722763	62	0.212695	-0.00886033	1.45868e-05	0.0123884	down	ENSG00000013810	TACC3	protein_coding	346	ENSG00000013810	TACC3	1
12	112408247	112408263	17	0.582611	-0.0133504	1.46355e-05	0.0123884	down	ENSG00000089009	RPL6	protein_coding	688	ENSG00000089009	RPL6	1
17	713374	713481	108	0.152783	-0.00617635	1.46415e-05	0.0123884	down	ENSG00000141252	VPS53	protein_coding	1031	ENSG00000141252	VPS53	0
3	6673951	6674026	76	0.72889	0.0107822	1.46483e-05	0.0123884	up	ENSG00000189229;ENSG00000226258	NA;GRM7-AS3	lncRNA;lncRNA	9007	ENSG00000226258	GRM7-AS3	0
14	104872919	104873279	361	0.641851	-0.00777077	1.46753e-05	0.0123884	down	ENSG00000099814	CEP170B	protein_coding	7638	ENSG00000099814	CEP170B	0
7	157281118	157281161	44	0.834072	-0.00666908	1.46832e-05	0.0123884	down				1524	ENSG00000229660	NA	0
14	97703219	97703291	73	0.855741	0.00784483	1.47371e-05	0.0124048	up				16560	ENSG00000197176	LINC02291	0
14	26451460	26451518	59	0.861177	0.00712108	1.47818e-05	0.0124134	up	ENSG00000139910	NOVA1	protein_coding	142998	ENSG00000262119	NA	0
16	84185461	84185504	44	0.0434524	-0.00570102	1.48795e-05	0.0124664	down	ENSG00000103168	TAF1C	protein_coding	408	ENSG00000103168	TAF1C	1
2	240455441	240455490	50	0.51035	-0.0134272	1.49156e-05	0.0124677	down	ENSG00000063660;ENSG00000218416	GPC1;NA	protein_coding;lncRNA	510	ENSG00000207611	MIR149	1
17	74922335	74922472	138	0.627784	-0.00801583	1.50668e-05	0.0124728	down	ENSG00000182040	USH1G	protein_coding	477	ENSG00000183034	OTOP2	1
7	6591600	6591630	31	0.119398	-0.0067049	1.50676e-05	0.0124728	down	ENSG00000146576	C7orf26	protein_coding	126	ENSG00000146576	C7orf26	1
10	35089031	35089100	70	0.166743	-0.00740223	1.50742e-05	0.0124728	down	ENSG00000108094	CUL2	protein_coding	959	ENSG00000108094	CUL2	1
2	9579290	9579483	194	0.80398	0.0067029	1.5119e-05	0.0124728	up				22557	ENSG00000151694	ADAM17	0
1	52905041	52905131	91	0.72966	-0.00495632	1.51231e-05	0.0124728	down	ENSG00000121310	ECHDC2	protein_coding	40	ENSG00000121310	ECHDC2	1
14	24370503	24370567	65	0.62595	-0.00971164	1.51294e-05	0.0124728	down	ENSG00000100968	NFATC4	protein_coding	1257	ENSG00000100968	NFATC4	0
1	53836270	53836323	54	0.744139	-0.00687583	1.52487e-05	0.0125424	down	ENSG00000058804	NDC1	protein_coding	1972	ENSG00000058804	NDC1	0
14	26484156	26484293	138	0.776063	0.00987881	1.53529e-05	0.0125994	up	ENSG00000139910	NOVA1	protein_coding	110223	ENSG00000262119	NA	0
22	38575184	38575320	137	0.79599	0.00803601	1.54664e-05	0.0126636	up	ENSG00000224279	RPS29P31	processed_pseudogene	110	ENSG00000224279	RPS29P31	1
20	34365507	34365576	70	0.255228	-0.0123497	1.56915e-05	0.0128188	down	ENSG00000078747	ITCH	protein_coding	2190	ENSG00000078747	ITCH	0
16	47032051	47032104	54	0.952766	-0.00228236	1.57908e-05	0.0128707	down	ENSG00000259821	NA	lncRNA	18093	ENSG00000259983	NA	0
9	135698295	135698485	191	0.282405	-0.0105543	1.59374e-05	0.0129388	down	ENSG00000165643	SOHLH1	protein_coding	995	ENSG00000165643	SOHLH1	1
19	2633571	2633862	292	0.875057	0.00510823	1.59461e-05	0.0129388	up	ENSG00000176533	GNG7	protein_coding	1616	ENSG00000267214	NA	0
9	133994278	133994312	35	0.137937	-0.00768485	1.60039e-05	0.0129547	down				1673	ENSG00000160293	VAV2	0
1	229506629	229506765	137	0.543197	-0.00994232	1.60377e-05	0.0129547	down	ENSG00000069248	NUP133	protein_coding	1560	ENSG00000069248	NUP133	0
5	176812918	176813012	95	0.740315	-0.0071363	1.61437e-05	0.0129848	down	ENSG00000113763	UNC5A	protein_coding	2358	ENSG00000113763	UNC5A	0
5	105887994	105888146	153	0.795858	0.00830152	1.61469e-05	0.0129848	up				34961	ENSG00000201790	RNA5SP189	0
7	131555027	131555075	49	0.748498	-0.00757775	1.6312e-05	0.0130883	down	ENSG00000128567	PODXL	protein_coding	1487	ENSG00000128567	PODXL	0
15	52294458	52294494	37	0.183235	-0.00424108	1.63814e-05	0.0131148	down	ENSG00000128833	MYO5C	protein_coding	1161	ENSG00000128833	MYO5C	0
20	3203308	3203514	207	0.268802	-0.00817626	1.65595e-05	0.013228	down	ENSG00000198171	DDRGK1	protein_coding	1167	ENSG00000198171	DDRGK1	0
20	17504660	17504695	36	0.0485512	-0.00474811	1.66755e-05	0.0132911	down	ENSG00000125864	BFSP1	protein_coding	10045	ENSG00000125864	BFSP1	0
1	1571888	1571955	68	0.273666	-0.0136639	1.68988e-05	0.0134202	down	ENSG00000160075	SSU72	protein_coding	2146	ENSG00000215014	NA	0
5	138552098	138552230	133	0.814734	0.004935	1.69482e-05	0.0134202	up				6400	ENSG00000113013	HSPA9	0
7	155490087	155490113	27	0.270683	-0.00851538	1.69491e-05	0.0134202	down	ENSG00000146910;ENSG00000283128	CNPY1;NA	protein_coding;protein_coding	6052	ENSG00000283128	NA	0
12	113637319	113637373	55	0.832872	-0.00579398	1.70099e-05	0.0134347	down	ENSG00000249550	LINC01234	lncRNA	120191	ENSG00000249550	LINC01234	0
19	3610849	3610916	68	0.868251	-0.00331659	1.70421e-05	0.0134347	down	ENSG00000226800;ENSG00000105298	CACTIN-AS1;CACTIN	lncRNA;protein_coding	1359	ENSG00000105298	CACTIN	0
19	38848388	38848545	158	0.0563969	-0.0022708	1.72816e-05	0.0135938	down	ENSG00000104824	HNRNPL	protein_coding	755	ENSG00000104824	HNRNPL	1
2	108942254	108942322	69	0.186301	-0.0075474	1.74259e-05	0.0136774	down	ENSG00000135960	EDAR	protein_coding	46897	ENSG00000135960	EDAR	0
11	67978542	67978696	155	0.542899	0.00860162	1.75224e-05	0.0137233	up				3298	ENSG00000255554	OR7E1P	0
19	44915839	44915918	80	0.285384	-0.00802919	1.75929e-05	0.0137429	down	ENSG00000130208	APOC1	protein_coding	969	ENSG00000130208	APOC1	1
8	21911532	21911587	56	0.202495	-0.00979387	1.76801e-05	0.0137429	down	ENSG00000147443	DOK2	protein_coding	456	ENSG00000147443	DOK2	1
17	44362575	44362855	281	0.0482246	-0.00217188	1.77113e-05	0.0137429	down	ENSG00000161682	FAM171A2	protein_coding	944	ENSG00000161682	FAM171A2	1
9	113277055	113277109	55	0.304322	-0.0102591	1.77392e-05	0.0137429	down	ENSG00000136875	PRPF4	protein_coding	1396	ENSG00000136875	PRPF4	0
13	21789386	21789589	204	0.901856	0.00366363	1.77746e-05	0.0137429	up				947	ENSG00000244197	RN7SL766P	1
7	1249848	1249973	126	0.647666	-0.0105583	1.77764e-05	0.0137429	down				16975	ENSG00000164853	UNCX	0
14	74304186	74304518	333	0.470341	-0.00733825	1.78394e-05	0.013752	down	ENSG00000133980	VRTN	protein_coding	906	ENSG00000258737	SUB1P2	1
7	151026866	151026985	120	0.872643	-0.00348392	1.78644e-05	0.013752	down				1436	ENSG00000197150	ABCB8	0
16	88854867	88855059	193	0.757619	-0.00499291	1.81779e-05	0.0139524	down	ENSG00000141012	GALNS	protein_coding	1160	ENSG00000167515	TRAPPC2L	0
19	13800560	13800618	59	0.419177	-0.0105261	1.82022e-05	0.0139524	down	ENSG00000132003	ZSWIM4	protein_coding	3626	ENSG00000267582	NA	0
20	62388168	62388267	100	0.347847	-0.00950114	1.82653e-05	0.0139691	down	ENSG00000171858	RPS21	protein_coding	842	ENSG00000171858	RPS21	1
1	39492937	39492996	60	0.178911	-0.00741741	1.83015e-05	0.0139691	down	ENSG00000183682	BMP8A	protein_coding	1300	ENSG00000183682	BMP8A	0
1	41495596	41495663	68	0.0323417	-0.00161574	1.84131e-05	0.0139906	down				10912	ENSG00000127129	EDN2	0
11	118979574	118979678	105	0.855277	-0.00416973	1.84411e-05	0.0139906	down	ENSG00000176302	FOXR1	protein_coding	794	ENSG00000176302	FOXR1	1
19	1287056	1287278	223	0.329182	-0.0090405	1.8474e-05	0.0139906	down	ENSG00000099617	EFNA2	protein_coding	1182	ENSG00000099617	EFNA2	0
19	38320805	38320869	65	0.284692	-0.00987279	1.84991e-05	0.0139906	down	ENSG00000099337	KCNK6	protein_coding	561	ENSG00000099337	KCNK6	1
14	90852973	90853081	109	0.549892	0.0102286	1.85239e-05	0.0139906	up	ENSG00000100784	RPS6KA5	protein_coding	24770	ENSG00000258884	LINC02321	0
11	430207	430335	129	0.702073	-0.011451	1.86474e-05	0.0140058	down	ENSG00000185101	ANO9	protein_coding	93	ENSG00000185101	ANO9	1
7	191270	191317	48	0.785954	-0.00676456	1.86792e-05	0.0140058	down	ENSG00000240093	NA	lncRNA	1253	ENSG00000177706	FAM20C	0
21	43657093	43657142	50	0.17204	-0.00658574	1.87078e-05	0.0140058	down	ENSG00000160207	HSF2BP	protein_coding	2327	ENSG00000160207	HSF2BP	0
9	136888118	136888167	50	0.182867	-0.00812585	1.87086e-05	0.0140058	down	ENSG00000127191	TRAF2	protein_coding	1367	ENSG00000127191	TRAF2	0
1	31156171	31156286	116	0.280751	-0.00692178	1.87467e-05	0.0140058	down				25389	ENSG00000084628	NKAIN1	0
6	153434325	153434387	63	0.840085	0.00733455	1.87987e-05	0.0140058	up				7170	ENSG00000237312	NA	0
19	17861485	17861614	130	0.685317	-0.00908488	1.88162e-05	0.0140058	down	ENSG00000105640	RPL18A	protein_coding	151	ENSG00000105640	RPL18A	1
13	27975039	27975149	111	0.0452848	-0.00213103	1.88876e-05	0.01403	down				5723	ENSG00000165556	CDX2	0
10	89530578	89530671	94	0.796512	0.00804041	1.90617e-05	0.0141053	up	ENSG00000152779	SLC16A12	protein_coding	4922	ENSG00000152779	SLC16A12	0
13	84839374	84839431	58	0.813938	0.00944073	1.90673e-05	0.0141053	up				62992	ENSG00000288038	NA	0
19	45094448	45094467	20	0.122831	-0.00643497	1.91433e-05	0.0141325	down	ENSG00000007047;ENSG00000104866	MARK4;PPP1R37	protein_coding;protein_coding	1242	ENSG00000104866	PPP1R37	0
7	145456413	145456548	136	0.791474	0.00939475	1.92389e-05	0.0141725	up				126648	ENSG00000231839	DPY19L4P2	0
16	383878	384104	227	0.125833	-0.00515469	1.92762e-05	0.0141725	down	ENSG00000129925;ENSG00000236829	PGAP6;NA	protein_coding;transcribed_processed_pseudogene	1727	ENSG00000236829	NA	0
2	77193846	77193857	12	0.695158	0.0106955	1.93667e-05	0.0141828	up	ENSG00000176204	LRRTM4	protein_coding	133245	ENSG00000286932	NA	0
5	173236216	173236256	41	0.0877068	-0.00549959	1.9369e-05	0.0141828	down				904	ENSG00000183072	NKX2-5	1
19	19322249	19322294	46	0.139401	-0.00733249	1.96797e-05	0.0142717	down	ENSG00000129933	MAU2	protein_coding	723	ENSG00000129933	MAU2	1
2	229919136	229919273	138	0.654383	-0.00968339	1.9701e-05	0.0142717	down	ENSG00000153827	TRIP12	protein_coding	2084	ENSG00000153827	TRIP12	0
1	23551998	23552050	53	0.0768741	-0.00603769	1.97357e-05	0.0142717	down				1082	ENSG00000235052	NA	0
6	162946800	162946800	1	0.848986	0.00991636	1.97382e-05	0.0142717	up	ENSG00000112530	PACRG	protein_coding	10747	ENSG00000217557	NA	0
14	104817168	104817258	91	0.310967	-0.00634381	1.97556e-05	0.0142717	down				1414	ENSG00000279140	NA	0
19	49853990	49853998	9	0.817075	-0.00753363	1.97963e-05	0.0142717	down	ENSG00000104960;ENSG00000268047	PTOV1;NA	protein_coding;lncRNA	407	ENSG00000104960	PTOV1	1
16	85302221	85302274	54	0.910632	-0.00460445	1.98057e-05	0.0142717	down	ENSG00000131149;ENSG00000287787	GSE1;NA	protein_coding;lncRNA	4050	ENSG00000266307	MIR5093	0
8	144274532	144275144	613	0.918734	-0.00203855	1.98072e-05	0.0142717	down	ENSG00000261236	BOP1	protein_coding	8078	ENSG00000260428	SCX	0
16	70287107	70287180	74	0.0430217	-0.00234602	1.99068e-05	0.0143148	down	ENSG00000090861	AARS1	protein_coding	2136	ENSG00000090861	AARS1	0
11	290425	290715	291	0.742479	-0.0136791	1.99931e-05	0.0143483	down	ENSG00000142102	PGGHG	protein_coding	504	ENSG00000142102	PGGHG	1
13	83554421	83554451	31	0.764815	0.0109858	2.00783e-05	0.0143576	up				100337	ENSG00000286446	NA	0
13	65652204	65652287	84	0.205501	0.00889521	2.00858e-05	0.0143576	up				136476	ENSG00000236565	HNRNPA3P5	0
7	136559934	136560137	204	0.897921	0.00305797	2.01289e-05	0.0143598	up				74277	ENSG00000226066	ZP3P2	0
2	130183851	130183869	19	0.471723	-0.0140663	2.02961e-05	0.0144188	down	ENSG00000152082	MZT2B	protein_coding	1100	ENSG00000136699	SMPD4	0
1	37750862	37751001	140	0.889459	-0.00383441	2.03014e-05	0.0144188	down	ENSG00000183317	EPHA10	protein_coding	1904	ENSG00000183317	EPHA10	0
5	138550488	138550557	70	0.729952	0.0109541	2.03316e-05	0.0144188	up				6995	ENSG00000289155	NA	0
16	57797404	57797495	92	0.255338	-0.0111818	2.0486e-05	0.0144998	down	ENSG00000140859	KIFC3	protein_coding	268	ENSG00000140859	KIFC3	1
5	149548709	149548774	66	0.189069	-0.00867335	2.08685e-05	0.0147175	down	ENSG00000113712	CSNK1A1	protein_coding	1524	ENSG00000113712	CSNK1A1	0
17	4938694	4938770	77	0.763278	-0.00662498	2.08753e-05	0.0147175	down	ENSG00000108528	SLC25A11	protein_coding	136	ENSG00000108528	SLC25A11	1
7	73558954	73559015	62	0.234902	-0.00744995	2.11513e-05	0.014883	down				1263	ENSG00000106635	BCL7B	0
9	73480088	73480088	1	0.881198	0.00664575	2.12476e-05	0.0149005	up				4014	ENSG00000221844	DPP3P2	0
19	58348073	58348327	255	0.0160217	-0.000689966	2.1259e-05	0.0149005	down	ENSG00000121410;ENSG00000268230;ENSG00000268895	A1BG;NA;A1BG-AS1	protein_coding;lncRNA;lncRNA	283	ENSG00000268895	A1BG-AS1	1
11	119319945	119319970	26	0.651714	-0.0106733	2.14356e-05	0.0149329	down	ENSG00000076706	MCAM	protein_coding	1053	ENSG00000076706	MCAM	0
5	120438314	120438374	61	0.770097	0.00974697	2.14484e-05	0.0149329	up				25925	ENSG00000184838	PRR16	0
15	45110519	45110540	22	0.50305	-0.0145738	2.14593e-05	0.0149329	down	ENSG00000140279	DUOX2	protein_coding	2913	ENSG00000140279	DUOX2	0
19	11504083	11504326	244	0.04187	-0.00188319	2.1471e-05	0.0149329	down	ENSG00000267477;ENSG00000161914	NA;ZNF653	protein_coding;protein_coding	857	ENSG00000161914	ZNF653	1
4	3768963	3769000	38	0.170424	-0.00704176	2.16094e-05	0.0150002	down				2577	ENSG00000184160	ADRA2C	0
19	32407558	32407610	53	0.248127	-0.013319	2.17487e-05	0.0150436	down	ENSG00000178904	DPY19L3	protein_coding	1368	ENSG00000178904	DPY19L3	0
7	63348364	63348395	32	0.379834	-0.0104787	2.17555e-05	0.0150436	down	ENSG00000226587	NA	lncRNA	465	ENSG00000230000	NA	1
11	64188938	64189145	208	0.814738	-0.00480763	2.20271e-05	0.0152023	down	ENSG00000168439	STIP1	protein_coding	2634	ENSG00000168439	STIP1	0
17	7135255	7135398	144	0.339078	-0.00843484	2.20888e-05	0.0152053	down				5531	ENSG00000213876	RPL7AP64	0
17	57884447	57884519	73	0.351404	-0.0106917	2.21158e-05	0.0152053	down	ENSG00000180891	CUEDC1	protein_coding	1317	ENSG00000180891	CUEDC1	0
9	133536046	133536157	112	0.894745	-0.00286392	2.21734e-05	0.0152158	down	ENSG00000197859	ADAMTSL2	protein_coding	1192	ENSG00000197859	ADAMTSL2	0
17	76029485	76029537	53	0.694187	-0.00807521	2.22784e-05	0.0152286	down				2178	ENSG00000167880	EVPL	0
10	84568317	84568380	64	0.738488	0.0118299	2.23028e-05	0.0152286	up				7873	ENSG00000178429	RPS3AP5	0
3	196660983	196660989	7	0.356546	-0.0130439	2.23189e-05	0.0152286	down	ENSG00000174004;ENSG00000163964	NRROS;PIGX	protein_coding;protein_coding	21207	ENSG00000163964	PIGX	0
13	30427521	30427575	55	0.110031	-0.00504906	2.24141e-05	0.0152647	down	ENSG00000236444	UBE2L5	protein_coding	415	ENSG00000236444	UBE2L5	1
11	65416443	65416563	121	0.19629	-0.00634008	2.24711e-05	0.0152746	down				6210	ENSG00000245532	NEAT1	0
10	45444634	45444728	95	0.424402	-0.0144718	2.26344e-05	0.0153042	down	ENSG00000012779;ENSG00000231964	ALOX5;NA	protein_coding;lncRNA	1212	ENSG00000012779	ALOX5	0
3	175639446	175639482	37	0.593653	0.0162093	2.2651e-05	0.0153042	up	ENSG00000177694	NAALADL2	protein_coding	29966	ENSG00000201648	RNU4-91P	0
3	154684593	154684612	20	0.639342	0.0102496	2.26557e-05	0.0153042	up				7473	ENSG00000240601	RPL9P15	0
20	49983881	49983939	59	0.308791	-0.0102609	2.26845e-05	0.0153042	down	ENSG00000124216	SNAI1	protein_coding	900	ENSG00000124216	SNAI1	1
1	201984091	201984229	139	0.0509478	-0.00201299	2.27906e-05	0.015347	down	ENSG00000176393	RNPEP	protein_coding	599	ENSG00000176393	RNPEP	1
22	17170636	17170740	105	0.641028	-0.00577778	2.29242e-05	0.0154082	down				5348	ENSG00000069998	HDHD5	0
14	47508805	47508986	182	0.802546	0.00660676	2.29744e-05	0.0154132	up	ENSG00000139915	MDGA2	protein_coding	64310	ENSG00000214903	RPS15AP3	0
13	32405142	32405232	91	0.808585	0.00784946	2.30414e-05	0.0154244	up	ENSG00000139597	N4BP2L1	protein_coding	6373	ENSG00000139597	N4BP2L1	0
14	61797412	61797470	59	0.888103	0.00560821	2.30768e-05	0.0154244	up				4242	ENSG00000279633	NA	0
4	586908	586977	70	0.744602	-0.00814886	2.31471e-05	0.0154428	down	ENSG00000283183	NA	lncRNA	7600	ENSG00000283183	NA	0
2	104557517	104557527	11	0.473673	0.0134383	2.32123e-05	0.0154576	up				24362	ENSG00000231626	NA	0
19	10651809	10651900	92	0.13295	-0.00473526	2.34494e-05	0.0155867	down	ENSG00000267100	ILF3-DT	lncRNA	1943	ENSG00000267100	ILF3-DT	0
22	36505434	36505686	253	0.493291	-0.00685442	2.3527e-05	0.0156095	down	ENSG00000100350	FOXRED2	protein_coding	843	ENSG00000100350	FOXRED2	1
2	61398890	61398925	36	0.85889	0.00735642	2.35836e-05	0.0156183	up	ENSG00000115464	USP34	protein_coding	18271	ENSG00000234624	NA	0
9	79625430	79625487	58	0.358524	0.0131082	2.3635e-05	0.0156236	up	ENSG00000106829	TLE4	protein_coding	27105	ENSG00000106829	TLE4	0
22	20116138	20116530	393	0.404053	-0.00849105	2.36899e-05	0.0156312	down	ENSG00000099899;ENSG00000099901	TRMT2A;RANBP1	protein_coding;protein_coding	19	ENSG00000099899	TRMT2A	1
8	10796310	10796373	64	0.888779	-0.00570483	2.3868e-05	0.0157194	down	ENSG00000258724;ENSG00000254093	PINX1;PINX1	protein_coding;protein_coding	29069	ENSG00000283210	MIR1322	0
19	55502908	55503065	158	0.362861	-0.00819993	2.39108e-05	0.0157194	down	ENSG00000179954	SSC5D	protein_coding	9016	ENSG00000179954	SSC5D	0
1	1513708	1513952	245	0.524367	-0.00862685	2.4067e-05	0.0157933	down	ENSG00000197785	ATAD3A	protein_coding	1177	ENSG00000197785	ATAD3A	0
1	958161	958226	66	0.43034	-0.0113041	2.41814e-05	0.0158395	down	ENSG00000188976	NOC2L	protein_coding	231	ENSG00000188976	NOC2L	1
15	40756638	40756705	68	0.44635	-0.0103182	2.42379e-05	0.0158477	down				786	ENSG00000137824	RMDN3	1
16	276535	276746	212	0.519619	-0.00917147	2.43414e-05	0.015885	down	ENSG00000286901	NA	lncRNA	554	ENSG00000076344	RGS11	1
7	105519482	105519542	61	0.145425	-0.00804869	2.43831e-05	0.015885	down	ENSG00000091127	PUS7	protein_coding	2715	ENSG00000091127	PUS7	0
2	2651207	2651356	150	0.0693795	-0.00320772	2.5076e-05	0.0163027	down	ENSG00000234929	NA	lncRNA	5273	ENSG00000234929	NA	0
19	48999894	48999964	71	0.569141	-0.0112187	2.51149e-05	0.0163027	down	ENSG00000183207	RUVBL2	protein_coding	574	ENSG00000183207	RUVBL2	1
1	191349577	191349770	194	0.130063	0.00494717	2.54227e-05	0.0164033	up				121109	ENSG00000233882	LINC01680	0
7	1226544	1226778	235	0.675976	-0.00561083	2.54265e-05	0.0164033	down				6093	ENSG00000164853	UNCX	0
7	97549831	97549850	20	0.576079	0.012724	2.54419e-05	0.0164033	up				49409	ENSG00000199475	RN7SKP104	0
7	157007786	157007898	113	0.69953	-0.00772496	2.54519e-05	0.0164033	down	ENSG00000130675	MNX1	protein_coding	1176	ENSG00000130675	MNX1	0
18	35242618	35242664	47	0.822937	-0.00633771	2.58135e-05	0.0165833	down	ENSG00000186812	ZNF397	protein_coding	130	ENSG00000186812	ZNF397	1
2	85417763	85417780	18	0.121898	-0.00507488	2.58275e-05	0.0165833	down	ENSG00000042493	CAPG	protein_coding	651	ENSG00000042493	CAPG	1
19	49663358	49663482	125	0.929759	-0.00157681	2.58693e-05	0.0165833	down	ENSG00000126456	IRF3	protein_coding	386	ENSG00000126456	IRF3	1
1	23482378	23482477	100	0.227165	-0.00824468	2.5976e-05	0.0165958	down	ENSG00000088280	ASAP3	protein_coding	1701	ENSG00000088280	ASAP3	0
16	68312315	68312394	80	0.206401	-0.00817889	2.60506e-05	0.0165958	down	ENSG00000132600	PRMT7	protein_coding	955	ENSG00000132600	PRMT7	1
16	46886130	46886213	84	0.51958	-0.0103344	2.6101e-05	0.0165958	down	ENSG00000166123	GPT2	protein_coding	1294	ENSG00000166123	GPT2	0
17	75977291	75977423	133	0.845529	-0.00540906	2.62268e-05	0.0165958	down	ENSG00000161533	ACOX1	protein_coding	1269	ENSG00000161533	ACOX1	0
11	62672969	62673103	135	0.110005	-0.00390796	2.6263e-05	0.0165958	down	ENSG00000204922	UQCC3	protein_coding	701	ENSG00000162194	LBHD1	1
11	71587021	71587187	167	0.73605	0.00651415	2.63081e-05	0.0165958	up	ENSG00000204571	KRTAP5-11	protein_coding	4145	ENSG00000204571	KRTAP5-11	0
4	172393123	172393123	1	0.427017	0.0158813	2.63089e-05	0.0165958	up	ENSG00000174473	GALNTL6	protein_coding	12635	ENSG00000248637	NA	0
19	1942871	1943189	319	0.0277289	-0.00139803	2.63234e-05	0.0165958	down	ENSG00000133275	CSNK1G2	protein_coding	411	ENSG00000133275	CSNK1G2	1
21	43756135	43756310	176	0.839954	-0.00580165	2.63525e-05	0.0165958	down	ENSG00000160209	PDXK	protein_coding	2551	ENSG00000160209	PDXK	0
15	95598274	95598275	2	0.758216	0.0111468	2.63528e-05	0.0165958	up				40040	ENSG00000275016	NA	0
16	1785134	1785226	93	0.891868	-0.00328388	2.63956e-05	0.0165958	down	ENSG00000162032;ENSG00000095906	SPSB3;NUBP2	protein_coding;protein_coding	422	ENSG00000095906	NUBP2	1
1	36841815	36841885	71	0.954687	0.00194975	2.64936e-05	0.0166285	up	ENSG00000163873	GRIK3	protein_coding	11801	ENSG00000163873	GRIK3	0
6	169640045	169640100	56	0.812704	-0.00859891	2.67164e-05	0.0167391	down	ENSG00000285733;ENSG00000184465	NA;WDR27	protein_coding;protein_coding	9132	ENSG00000184465	WDR27	0
9	136850811	136850898	88	0.742348	-0.00547183	2.68412e-05	0.0167881	down	ENSG00000054148	PHPT1	protein_coding	44	ENSG00000177943	MAMDC4	1
22	35400851	35401116	266	0.0483014	-0.00181423	2.69216e-05	0.0168092	down	ENSG00000100297	MCM5	protein_coding	419	ENSG00000100297	MCM5	1
16	31455650	31455698	49	0.62299	-0.0104657	2.69956e-05	0.0168262	down				2156	ENSG00000261474	NA	0
10	1359972	1360158	187	0.728581	-0.00881118	2.72024e-05	0.0169259	down	ENSG00000185736	ADARB2	protein_coding	1478	ENSG00000233052	NA	0
3	53847516	53847651	136	0.153724	-0.00641373	2.74366e-05	0.0170174	down	ENSG00000056736	IL17RB	protein_coding	930	ENSG00000056736	IL17RB	1
12	117188413	117188519	107	0.138757	-0.00570982	2.74447e-05	0.0170174	down	ENSG00000135108	FBXO21	protein_coding	511	ENSG00000135108	FBXO21	1
1	32290913	32291046	134	0.706177	-0.0050086	2.74913e-05	0.0170174	down				1036	ENSG00000116478	HDAC1	0
9	137579892	137579952	61	0.40807	-0.00780424	2.75848e-05	0.0170313	down				966	ENSG00000148399	DPH7	1
15	74935685	74935886	202	0.794544	-0.00548471	2.76083e-05	0.0170313	down	ENSG00000178741	COX5A	protein_coding	1889	ENSG00000178741	COX5A	0
16	89561761	89561880	120	0.0315924	-0.00212015	2.77572e-05	0.0170939	down	ENSG00000167526	RPL13	protein_coding	259	ENSG00000167526	RPL13	1
19	3490125	3490318	194	0.607855	-0.0138988	2.78458e-05	0.0171192	down				3852	ENSG00000129932	DOHH	0
13	85159619	85159749	131	0.924844	0.00439975	2.79156e-05	0.0171329	up				11497	ENSG00000286906	NA	0
20	29080152	29080728	577	0.201733	0.00326873	2.8118e-05	0.0172278	up	ENSG00000282870	FRG1DP	unprocessed_pseudogene	0	ENSG00000282870	FRG1DP	1
10	132388938	132389028	91	0.0238607	-0.00191196	2.82212e-05	0.0172617	down				8139	ENSG00000171813	PWWP2B	0
17	76351119	76351239	121	0.486869	-0.0095694	2.82898e-05	0.0172743	down	ENSG00000161542	PRPSAP1	protein_coding	2212	ENSG00000161542	PRPSAP1	0
5	88849007	88849076	70	0.920821	0.00439213	2.83531e-05	0.0172782	up	ENSG00000081189	MEF2C	protein_coding	9697	ENSG00000081189	MEF2C	0
14	63393580	63393637	58	0.966409	-0.00224945	2.84018e-05	0.0172782	down	ENSG00000154001	PPP2R5E	protein_coding	60138	ENSG00000154001	PPP2R5E	0
12	120402341	120402460	120	0.880754	-0.00317916	2.84402e-05	0.0172782	down				12794	ENSG00000256695	NA	0
1	32181412	32181412	1	0.0483776	-0.00458115	2.87836e-05	0.017419	down	ENSG00000084652	TXLNA	protein_coding	1346	ENSG00000084652	TXLNA	0
14	100710231	100710293	63	0.157103	-0.00643541	2.88162e-05	0.017419	down				15411	ENSG00000185559	DLK1	0
8	11804767	11804905	139	0.825494	-0.00494225	2.89279e-05	0.017419	down	ENSG00000079459	FDFT1	protein_coding	1671	ENSG00000079459	FDFT1	0
12	13199425	13199436	12	0.839798	0.0102866	2.89783e-05	0.017419	up	ENSG00000134531	EMP1	protein_coding	2638	ENSG00000134531	EMP1	0
17	1396718	1396842	125	0.704786	-0.00850544	2.9028e-05	0.017419	down	ENSG00000108953	YWHAE	protein_coding	2746	ENSG00000108953	YWHAE	0
2	218658413	218658529	117	0.0574696	-0.00304696	2.90367e-05	0.017419	down	ENSG00000115568	ZNF142	protein_coding	234	ENSG00000074582	BCS1L	1
22	50252062	50252087	26	0.819818	-0.00749085	2.90827e-05	0.017419	down	ENSG00000188130	MAPK12	protein_coding	656	ENSG00000100429	HDAC10	1
9	126845753	126845813	61	0.806444	0.00709375	2.91976e-05	0.017419	up				9532	ENSG00000169155	ZBTB43	0
1	6462535	6462548	14	0.878045	-0.00476004	2.92049e-05	0.017419	down	ENSG00000215788	TNFRSF25	protein_coding	58	ENSG00000215788	TNFRSF25	1
17	60603492	60603538	47	0.28209	-0.0107342	2.92143e-05	0.017419	down	ENSG00000170836	PPM1D	protein_coding	1055	ENSG00000170836	PPM1D	0
12	132558304	132558447	144	0.769039	-0.00946587	2.92168e-05	0.017419	down	ENSG00000112787	FBRSL1	protein_coding	1599	ENSG00000112787	FBRSL1	0
17	81221207	81221332	126	0.899219	-0.00337176	2.92521e-05	0.017419	down	ENSG00000141577	CEP131	protein_coding	1597	ENSG00000141577	CEP131	0
1	37475597	37475796	200	0.847588	-0.00338989	2.93325e-05	0.0174381	down	ENSG00000163874	ZC3H12A	protein_coding	1016	ENSG00000163874	ZC3H12A	0
8	143016201	143016228	28	0.307909	-0.0109228	2.94536e-05	0.0174812	down	ENSG00000247317	LY6E-DT	lncRNA	1753	ENSG00000160932	LY6E	0
2	234954614	234954614	1	0.566679	-0.0148286	2.9555e-05	0.0175126	down	ENSG00000130147	SH3BP4	protein_coding	2537	ENSG00000130147	SH3BP4	0
22	40344166	40344229	64	0.664606	0.0110106	2.9752e-05	0.0176003	up				2231	ENSG00000239900	ADSL	0
16	88802021	88802050	30	0.259809	-0.00868341	2.99315e-05	0.0176696	down				1738	ENSG00000167513	CDT1	0
4	743470	743666	197	0.758967	-0.00660569	3.00071e-05	0.0176696	down	ENSG00000185619	PCGF3	protein_coding	198	ENSG00000185619	PCGF3	1
11	62444825	62444825	1	0.316152	0.0118209	3.01162e-05	0.0176696	up	ENSG00000124942	AHNAK	protein_coding	18100	ENSG00000255446	NA	0
13	21192948	21192956	9	0.104753	-0.00467756	3.01299e-05	0.0176696	down				16289	ENSG00000173141	MRPL57	0
1	153792112	153792493	382	0.949362	-0.00134439	3.02095e-05	0.0176696	down	ENSG00000143614	GATAD2B	protein_coding	1443	ENSG00000231827	NA	0
14	21136780	21136843	64	0.757529	0.0138362	3.02098e-05	0.0176696	up				19219	ENSG00000169327	OR5AU1	0
19	38928500	38928531	32	0.75768	-0.0101089	3.02125e-05	0.0176696	down	ENSG00000104835;ENSG00000269547	SARS2;NA	protein_coding;protein_coding	1601	ENSG00000104835	SARS2	0
X	71081174	71081223	50	0.483845	0.0109232	3.0283e-05	0.0176822	up				7747	ENSG00000147164	SNX12	0
13	72726151	72726356	206	0.0634298	-0.00220913	3.05107e-05	0.0177607	down	ENSG00000204899	MZT1	protein_coding	1272	ENSG00000204899	MZT1	0
10	100265772	100265817	46	0.185848	-0.00814624	3.05161e-05	0.0177607	down	ENSG00000095485	CWF19L1	protein_coding	1780	ENSG00000095485	CWF19L1	0
22	18968219	18968395	177	0.88255	-0.00257908	3.0824e-05	0.0178879	down				2043	ENSG00000273032	DGCR5	0
19	1855461	1855714	254	0.760734	-0.00743979	3.08339e-05	0.0178879	down	ENSG00000129911	KLF16	protein_coding	3078	ENSG00000267125	NA	0
19	40215035	40215184	150	0.81389	-0.00580818	3.09861e-05	0.0179287	down	ENSG00000130758	MAP3K10	protein_coding	3197	ENSG00000174521	TTC9B	0
19	2049981	2050091	111	0.295886	-0.00918716	3.10038e-05	0.0179287	down	ENSG00000099875	MKNK2	protein_coding	761	ENSG00000099875	MKNK2	1
22	49540329	49540396	68	0.0249055	-0.00187483	3.11044e-05	0.0179581	down	ENSG00000188511	MIR3667HG	lncRNA	3069	ENSG00000264139	MIR3667	0
17	7477969	7477973	5	0.690741	-0.00988302	3.13612e-05	0.018055	down	ENSG00000174282	ZBTB4	protein_coding	1657	ENSG00000174282	ZBTB4	0
9	128704155	128704298	144	0.448967	-0.008627	3.13725e-05	0.018055	down	ENSG00000160447	PKN3	protein_coding	1651	ENSG00000160447	PKN3	0
12	49569316	49569377	62	0.0386191	-0.00320653	3.14246e-05	0.0180561	down	ENSG00000110844	PRPF40B	protein_coding	943	ENSG00000110844	PRPF40B	1
3	128607728	128607837	110	0.0805517	-0.00363896	3.15044e-05	0.0180656	down				19428	ENSG00000163902	RPN1	0
19	14202870	14202890	21	0.736498	-0.0100608	3.15773e-05	0.0180656	down	ENSG00000072071	ADGRL1	protein_coding	3278	ENSG00000072071	ADGRL1	0
10	124094585	124094745	161	0.196318	-0.00577213	3.15916e-05	0.0180656	down				986	ENSG00000182022	CHST15	1
16	1291679	1291818	140	0.947052	-0.00161256	3.18856e-05	0.0182049	down				2841	ENSG00000260284	TPSP2	0
19	42386313	42386367	55	0.244093	-0.0101076	3.20005e-05	0.0182407	down				3900	ENSG00000105427	CNFN	0
19	54104369	54104425	57	0.493006	-0.00783269	3.20496e-05	0.0182407	down	ENSG00000170906	NDUFA3	protein_coding	1254	ENSG00000170906	NDUFA3	0
8	141305080	141305129	50	0.811529	-0.00655851	3.23505e-05	0.0183398	down	ENSG00000022567	SLC45A4	protein_coding	3158	ENSG00000022567	SLC45A4	0
17	2908132	2908313	182	0.20763	-0.010762	3.24051e-05	0.0183398	down	ENSG00000132359	RAP1GAP2	protein_coding	57581	ENSG00000262884	NA	0
19	19145037	19145068	32	0.124752	-0.00617012	3.24298e-05	0.0183398	down				6523	ENSG00000064545	TMEM161A	0
2	112158870	112159000	131	0.848973	-0.00377472	3.24518e-05	0.0183398	down	ENSG00000144152	FBLN7	protein_coding	747	ENSG00000144152	FBLN7	1
20	46305961	46306110	150	0.823291	-0.00359074	3.24782e-05	0.0183398	down	ENSG00000149654	CDH22	protein_coding	2387	ENSG00000149654	CDH22	0
19	54418145	54418288	144	0.450294	-0.0079468	3.27039e-05	0.0184383	down	ENSG00000167614	TTYH1	protein_coding	0	ENSG00000167614	TTYH1	1
1	9769886	9769955	70	0.904717	0.00328328	3.29041e-05	0.0185222	up	ENSG00000171603	CLSTN1	protein_coding	10866	ENSG00000271264	MZT1P1	0
3	48242107	48242408	302	0.337107	-0.00683397	3.29782e-05	0.018535	down	ENSG00000164048	ZNF589	protein_coding	951	ENSG00000164048	ZNF589	1
11	70487784	70487833	50	0.567481	-0.0119353	3.31184e-05	0.0185847	down	ENSG00000162105	SHANK2	protein_coding	63	ENSG00000162105	SHANK2	1
2	236239762	236239865	104	0.762656	-0.00621054	3.3329e-05	0.0186738	down	ENSG00000233611;ENSG00000182177	NA;ASB18	lncRNA;protein_coding	1654	ENSG00000182177	ASB18	0
12	57224420	57224425	6	0.34553	-0.0114337	3.36074e-05	0.0188005	down	ENSG00000182379	NXPH4	protein_coding	4550	ENSG00000182379	NXPH4	0
19	4063804	4063880	77	0.101211	-0.00462671	3.38318e-05	0.0188968	down	ENSG00000178951	ZBTB7A	protein_coding	1054	ENSG00000268670	NA	0
4	164964071	164964273	203	0.590586	0.0123249	3.38983e-05	0.0189046	up	ENSG00000183439	TRIM61	protein_coding	7122	ENSG00000250486	FAM218A	0
19	10118613	10118721	109	0.587789	-0.0087332	3.41864e-05	0.0190358	down	ENSG00000130811	EIF3G	protein_coding	978	ENSG00000130811	EIF3G	1
11	629125	629150	26	0.11032	-0.00767363	3.49534e-05	0.0194052	down				1943	ENSG00000070031	SCT	0
12	6916626	6916642	17	0.774794	-0.00763727	3.49896e-05	0.0194052	down	ENSG00000111674	ENO2	protein_coding	686	ENSG00000111674	ENO2	1
16	4445700	4445713	14	0.967615	-0.00199901	3.50114e-05	0.0194052	down	ENSG00000103423	DNAJA3	protein_coding	3840	ENSG00000103423	DNAJA3	0
20	46087836	46087844	9	0.0409511	-0.00280285	3.50879e-05	0.01941	down	ENSG00000124160	NCOA5	protein_coding	2107	ENSG00000124160	NCOA5	0
19	44843259	44843333	75	0.785235	-0.0058302	3.51745e-05	0.01941	down				2841	ENSG00000130202	NECTIN2	0
8	17146025	17146197	173	0.866915	0.00464072	3.51817e-05	0.01941	up	ENSG00000249258	NA	lncRNA	4690	ENSG00000244113	NA	0
8	140509531	140509588	58	0.107002	-0.00479532	3.61984e-05	0.019934	down				1487	ENSG00000259891	NA	0
5	216673	216813	141	0.493814	-0.00907183	3.63938e-05	0.019934	down	ENSG00000164366;ENSG00000260774	CCDC127;NA	protein_coding;lncRNA	404	ENSG00000164366	CCDC127	1
19	46213955	46214076	122	0.867184	0.00396598	3.64018e-05	0.019934	up	ENSG00000268460	NA	lncRNA	3712	ENSG00000268460	NA	0
19	19325572	19325583	12	0.971306	0.00206634	3.64652e-05	0.019934	up	ENSG00000129933	MAU2	protein_coding	4046	ENSG00000129933	MAU2	0
20	62218597	62218731	135	0.821255	-0.0039411	3.65022e-05	0.019934	down	ENSG00000101180	HRH3	protein_coding	1535	ENSG00000101180	HRH3	0
17	5417825	5417864	40	0.407385	-0.0150589	3.65077e-05	0.019934	down	ENSG00000108559	NUP88	protein_coding	364	ENSG00000108559	NUP88	1
12	641562	641702	141	0.0208603	-0.00153384	3.65188e-05	0.019934	down	ENSG00000171840;ENSG00000177406	NINJ2;NINJ2-AS1	protein_coding;lncRNA	971	ENSG00000177406	NINJ2-AS1	1
3	53349351	53349367	17	0.196819	-0.00913417	3.67128e-05	0.0200096	down	ENSG00000157388	CACNA1D	protein_coding	1764	ENSG00000272886	DCP1A	0
1	156846325	156846348	24	0.712367	-0.00767901	3.67779e-05	0.0200148	down	ENSG00000198400;ENSG00000027644	NTRK1;INSRR	protein_coding;protein_coding	9115	ENSG00000198400	NTRK1	0
1	10031183	10031378	196	0.50104	-0.00973154	3.68816e-05	0.0200185	down				1453	ENSG00000130939	UBE4B	0
12	106245837	106245895	59	0.356076	-0.0105193	3.68959e-05	0.0200185	down	ENSG00000136026;ENSG00000258355	CKAP4;NA	protein_coding;lncRNA	1060	ENSG00000258355	NA	0
13	103978591	103978591	1	0.367035	0.0124342	3.71472e-05	0.0201246	up				147338	ENSG00000287734	NA	0
5	20919425	20919562	138	0.88391	0.00503495	3.74481e-05	0.0202571	up	ENSG00000251629	LINC02241	lncRNA	16583	ENSG00000251629	LINC02241	0
4	164965144	164965213	70	0.809114	0.00710134	3.75426e-05	0.0202681	up	ENSG00000183439	TRIM61	protein_coding	8195	ENSG00000250486	FAM218A	0
6	42977513	42977637	125	0.396667	-0.00844524	3.7581e-05	0.0202681	down	ENSG00000124587	PEX6	protein_coding	1512	ENSG00000124587	PEX6	0
6	27804284	27804420	137	0.3002	-0.0107253	3.77182e-05	0.0203117	down				2654	ENSG00000217862	H4C10P	0
5	176648273	176648305	33	0.115816	-0.00595534	3.78268e-05	0.0203398	down	ENSG00000048140	TSPAN17	protein_coding	652	ENSG00000048140	TSPAN17	1
7	30506571	30506701	131	0.922746	0.00233793	3.80798e-05	0.0204454	up	ENSG00000281039	NA	protein_coding	1729	ENSG00000006625	GGCT	0
16	30095266	30095670	405	0.039636	-0.00149949	3.8138e-05	0.0204461	down	ENSG00000090238	YPEL3	protein_coding	0	ENSG00000090238	YPEL3	1
12	64407211	64407343	133	0.508966	-0.00648129	3.83669e-05	0.0205383	down	ENSG00000184575	XPOT	protein_coding	2164	ENSG00000184575	XPOT	0
20	3851677	3851709	33	0.247833	-0.00890135	3.85674e-05	0.0205937	down	ENSG00000088888	MAVS	protein_coding	4842	ENSG00000088888	MAVS	0
13	110911171	110911247	77	0.85751	-0.00665272	3.85849e-05	0.0205937	down	ENSG00000088448	ANKRD10	protein_coding	424	ENSG00000088448	ANKRD10	1
9	105190937	105190991	55	0.832172	0.00925992	3.86654e-05	0.0206062	up	ENSG00000286536	NA	lncRNA	48229	ENSG00000286536	NA	0
9	136367788	136368064	277	0.96188	-0.0010449	3.89362e-05	0.0207143	down	ENSG00000187796	CARD9	protein_coding	157	ENSG00000187796	CARD9	1
2	135837337	135837397	61	0.83104	0.00697765	3.89832e-05	0.0207143	up				152	ENSG00000115850	LCT	1
3	80099170	80099310	141	0.914465	0.00475412	3.91227e-05	0.0207578	up				64016	ENSG00000271389	OSBPL9P1	0
19	58256566	58256624	59	0.575671	-0.0109477	3.93955e-05	0.0208718	down	ENSG00000198131;ENSG00000283515	ZNF544;NA	protein_coding;protein_coding	4316	ENSG00000198131	ZNF544	0
2	112298995	112299134	140	0.788888	0.0100424	3.94746e-05	0.020883	up	ENSG00000188177	ZC3H6	protein_coding	721	ENSG00000188177	ZC3H6	1
3	158733368	158733567	200	0.0795437	-0.00290539	3.96118e-05	0.0208964	down	ENSG00000118855;ENSG00000240207	MFSD1;NA	protein_coding;lncRNA	878	ENSG00000118849	RARRES1	1
11	629284	629329	46	0.213509	-0.0118291	3.9616e-05	0.0208964	down				2102	ENSG00000070031	SCT	0
11	43940602	43940656	55	0.859185	-0.00656273	3.97142e-05	0.0209176	down	ENSG00000254409;ENSG00000187479	NA;C11orf96	lncRNA;protein_coding	1980	ENSG00000187479	C11orf96	0
7	6651619	6651646	28	0.345568	-0.00888902	3.98718e-05	0.0209699	down	ENSG00000205903	ZNF316	protein_coding	9733	ENSG00000205903	ZNF316	0
19	35546740	35546863	124	0.553757	-0.00842994	4.003e-05	0.0209962	down	ENSG00000105677	TMEM147	protein_coding	710	ENSG00000236144	TMEM147-AS1	1
16	11713605	11713712	108	0.506541	-0.011699	4.00383e-05	0.0209962	down	ENSG00000153066	TXNDC11	protein_coding	20286	ENSG00000153066	TXNDC11	0
7	25397605	25397621	17	0.73423	0.010178	4.02838e-05	0.0210943	up	ENSG00000260951	NA	lncRNA	29022	ENSG00000260951	NA	0
12	111397864	111397959	96	0.56011	-0.00982821	4.03695e-05	0.0210994	down	ENSG00000257595	LINC02356	lncRNA	1028	ENSG00000257595	LINC02356	0
4	1522230	1522256	27	0.218369	-0.0107196	4.04108e-05	0.0210994	down				28027	ENSG00000272783	NA	0
12	52096187	52096387	201	0.540719	0.00655537	4.05916e-05	0.0211624	up	ENSG00000284791;ENSG00000257542;ENSG00000257989	SMIM41;OR7E47P;NA	protein_coding;transcribed_unprocessed_pseudogene;lncRNA	2617	ENSG00000257542	OR7E47P	0
14	99176767	99176833	67	0.17572	-0.00761695	4.06717e-05	0.0211624	down	ENSG00000127152	BCL11B	protein_coding	18350	ENSG00000229402	NA	0
2	231529316	231529423	108	0.917808	-0.00256828	4.07077e-05	0.0211624	down	ENSG00000171596	NMUR1	protein_coding	1021	ENSG00000171596	NMUR1	0
16	67818069	67818094	26	0.866619	-0.00512488	4.07887e-05	0.021174	down	ENSG00000102904	TSNAXIP1	protein_coding	9455	ENSG00000102904	TSNAXIP1	0
17	42549557	42549611	55	0.897242	-0.00414487	4.10826e-05	0.0212959	down	ENSG00000266929	NA	lncRNA	2792	ENSG00000108785	HSD17B1P1	0
9	137148339	137148515	177	0.93579	-0.00162017	4.12218e-05	0.0213215	down	ENSG00000176884	GRIN1	protein_coding	493	ENSG00000176884	GRIN1	1
13	43415947	43416172	226	0.778806	-0.00693367	4.12615e-05	0.0213215	down	ENSG00000120658	ENOX1	protein_coding	21421	ENSG00000232540	RPL36P19	0
9	93448778	93448919	142	0.738657	-0.00982674	4.13293e-05	0.0213215	down	ENSG00000188938	FAM120AOS	protein_coding	2063	ENSG00000188938	FAM120AOS	0
5	30935552	30935670	119	0.73923	0.00587569	4.13688e-05	0.0213215	up				117894	ENSG00000241668	RPL19P11	0
2	209575243	209575378	136	0.773278	0.0101437	4.15557e-05	0.0213873	up	ENSG00000078018	MAP2	protein_coding	3936	ENSG00000078018	MAP2	0
7	1816936	1816967	32	0.337923	-0.0098834	4.17401e-05	0.0214515	down	ENSG00000002822;ENSG00000286192	MAD1L1;NA	protein_coding;protein_coding	117	ENSG00000002822	MAD1L1	1
2	10835911	10835976	66	0.340314	-0.00994614	4.18187e-05	0.0214613	down	ENSG00000143870	PDIA6	protein_coding	2000	ENSG00000143870	PDIA6	0
19	50951515	50951746	232	0.200622	-0.00490586	4.2116e-05	0.0215584	down	ENSG00000167754;ENSG00000269495	KLK5;NA	protein_coding;lncRNA	921	ENSG00000167754	KLK5	1
20	4147907	4147972	66	0.191668	-0.00596841	4.21276e-05	0.0215584	down	ENSG00000088826	SMOX	protein_coding	806	ENSG00000088826	SMOX	1
12	130268757	130268829	73	0.691055	0.0105708	4.23592e-05	0.0215883	up				19077	ENSG00000259862	NA	0
2	176087359	176087507	149	0.0588509	-0.00208177	4.23814e-05	0.0215883	down				3396	ENSG00000174279	EVX2	0
16	2265577	2265634	58	0.651757	-0.0113514	4.23915e-05	0.0215883	down	ENSG00000205937	RNPS1	protein_coding	326	ENSG00000205937	RNPS1	1
4	127812131	127812236	106	0.876233	0.00653417	4.24257e-05	0.0215883	up	ENSG00000164070	HSPA4L	protein_coding	781	ENSG00000164070	HSPA4L	1
14	105480056	105480109	54	0.833927	-0.0060989	4.26639e-05	0.0216789	down	ENSG00000182809	CRIP2	protein_coding	1463	ENSG00000182809	CRIP2	0
2	24776145	24776176	32	0.913754	0.00487215	4.27272e-05	0.0216805	up				8373	ENSG00000084676	NCOA1	0
16	4801033	4801104	72	0.547709	-0.00907529	4.29156e-05	0.0217454	down	ENSG00000285952;ENSG00000067836	NA;ROGDI	lncRNA;protein_coding	196	ENSG00000067836	ROGDI	1
12	57626790	57626839	50	0.388771	-0.0133517	4.29977e-05	0.0217564	down	ENSG00000135454	B4GALNT1	protein_coding	1889	ENSG00000135454	B4GALNT1	0
16	4935695	4935767	73	0.0639231	-0.00399229	4.31766e-05	0.0218163	down	ENSG00000118898	PPL	protein_coding	1296	ENSG00000118898	PPL	0
2	126887484	126887617	134	0.387464	-0.00726388	4.35135e-05	0.0219417	down				11246	ENSG00000237524	TEX51	0
3	70859634	70859922	289	0.870714	0.00367203	4.35689e-05	0.0219417	up				51283	ENSG00000206939	RNU6-281P	0
19	19322459	19322525	67	0.239211	-0.0109256	4.36224e-05	0.0219417	down	ENSG00000129933	MAU2	protein_coding	933	ENSG00000129933	MAU2	1
5	1880954	1881058	105	0.122802	-0.00652769	4.36963e-05	0.0219417	down	ENSG00000113430	IRX4	protein_coding	34	ENSG00000113430	IRX4	1
2	225467048	225467198	151	0.754182	0.00894255	4.37293e-05	0.0219417	up	ENSG00000144460	NYAP2	protein_coding	66161	ENSG00000144460	NYAP2	0
2	68260259	68260394	136	0.919325	0.00381808	4.38457e-05	0.0219695	up	ENSG00000273398;ENSG00000289156	NA;NA	protein_coding;lncRNA	835	ENSG00000273398	NA	1
15	50519436	50519640	205	0.840761	0.00687521	4.39133e-05	0.0219728	up	ENSG00000170236	USP50	protein_coding	9820	ENSG00000170236	USP50	0
8	18509392	18509392	1	0.942507	0.00379704	4.41806e-05	0.0220487	up				118104	ENSG00000156006	NAT2	0
1	51847494	51847729	236	0.0532966	-0.00347875	4.41873e-05	0.0220487	down	ENSG00000078618	NRDC	protein_coding	7039	ENSG00000078618	NRDC	0
20	58307875	58308069	195	0.0630355	-0.00351649	4.45747e-05	0.0221914	down	ENSG00000124224	PPP4R1L	transcribed_unprocessed_pseudogene	1363	ENSG00000124224	PPP4R1L	0
4	1548934	1549009	76	0.15214	-0.0118238	4.45966e-05	0.0221914	down				1274	ENSG00000272783	NA	0
10	107925986	107926049	64	0.567621	0.010865	4.48801e-05	0.0222612	up	ENSG00000229981	LINC01435	lncRNA	114649	ENSG00000229981	LINC01435	0
4	132809494	132809511	18	0.454019	0.0153372	4.49226e-05	0.0222612	up				172165	ENSG00000251488	NA	0
17	27458335	27458381	47	0.221042	-0.00886265	4.49859e-05	0.0222612	down	ENSG00000141068	KSR1	protein_coding	1604	ENSG00000141068	KSR1	0
2	207608653	207608783	131	0.587118	0.0115575	4.49925e-05	0.0222612	up	ENSG00000144401	METTL21A	protein_coding	4242	ENSG00000144401	METTL21A	0
15	30173517	30173565	49	0.500894	-0.00906458	4.50673e-05	0.0222612	down	ENSG00000259906	NA	lncRNA	5563	ENSG00000259906	NA	0
2	74656554	74656633	80	0.821244	-0.00527287	4.51075e-05	0.0222612	down	ENSG00000135622	SEMA4F	protein_coding	2191	ENSG00000135622	SEMA4F	0
19	2094207	2094342	136	0.504664	-0.00900842	4.53238e-05	0.0223118	down	ENSG00000172081	MOB3A	protein_coding	1927	ENSG00000172081	MOB3A	0
16	2265719	2265779	61	0.505708	-0.0119498	4.5334e-05	0.0223118	down	ENSG00000205937	RNPS1	protein_coding	468	ENSG00000205937	RNPS1	1
3	125929276	125929411	136	0.574403	0.00823594	4.55008e-05	0.0223361	up	ENSG00000171084;ENSG00000189366	FAM86JP;ALG1L	transcribed_unprocessed_pseudogene;transcribed_unprocessed_pseudogene	7627	ENSG00000189366	ALG1L	0
7	11178531	11178588	58	0.387362	0.00931352	4.55107e-05	0.0223361	up				2313	ENSG00000230333	NA	0
7	80390332	80390396	65	0.203362	0.00669735	4.56349e-05	0.0223361	up	ENSG00000232667;ENSG00000135218	NA;CD36	lncRNA;protein_coding	320	ENSG00000232667	NA	1
19	3490389	3490459	71	0.489024	-0.0163294	4.56385e-05	0.0223361	down				3711	ENSG00000129932	DOHH	0
12	57214592	57214884	293	0.7964	-0.00488788	4.56933e-05	0.0223361	down				1909	ENSG00000182379	NXPH4	0
13	63650949	63651087	139	0.450703	0.00926266	4.58602e-05	0.0223514	up				65930	ENSG00000231061	LINC00395	0
10	5887543	5887637	95	0.2966	-0.0102507	4.58643e-05	0.0223514	down	ENSG00000134461	ANKRD16	protein_coding	332	ENSG00000134461	ANKRD16	1
12	132155508	132155559	52	0.193683	-0.00645168	4.59107e-05	0.0223514	down				4666	ENSG00000184967	NOC4L	0
12	113334071	113334137	67	0.240893	-0.00807768	4.6055e-05	0.0223914	down	ENSG00000089060	SLC8B1	protein_coding	475	ENSG00000089060	SLC8B1	1
9	137049482	137049547	66	0.648167	-0.0105254	4.61472e-05	0.022406	down	ENSG00000054179	ENTPD2	protein_coding	65	ENSG00000054179	ENTPD2	1
10	8487471	8487558	88	0.845287	0.00722444	4.63732e-05	0.0224591	up				14751	ENSG00000271251	NA	0
7	73841720	73841776	57	0.0937453	-0.0041314	4.63947e-05	0.0224591	down	ENSG00000165171	METTL27	protein_coding	739	ENSG00000165171	METTL27	1
10	31061869	31061870	2	0.77737	0.0115428	4.64437e-05	0.0224591	up	ENSG00000287564	NA	lncRNA	28779	ENSG00000287564	NA	0
19	56541221	56541248	28	0.703408	-0.00687749	4.66073e-05	0.022508	down	ENSG00000196867	ZFP28	protein_coding	2090	ENSG00000196867	ZFP28	0
19	1308476	1308610	135	0.224124	-0.00763226	4.68265e-05	0.0225836	down				756	ENSG00000240846	RPS15P9	1
6	36365065	36365093	29	0.09232	-0.00447925	4.69922e-05	0.0226214	down	ENSG00000010030	ETV7	protein_coding	21737	ENSG00000224666	ETV7-AS1	0
19	14084689	14084762	74	0.737217	-0.00655997	4.70306e-05	0.0226214	down	ENSG00000188032	C19orf67	protein_coding	1020	ENSG00000188032	C19orf67	0
19	51299446	51299474	29	0.939885	-0.00198971	4.71029e-05	0.022626	down				12169	ENSG00000142549	IGLON5	0
15	70024408	70024421	14	0.82253	-0.00464951	4.72631e-05	0.0226696	down				27083	ENSG00000140332	TLE3	0
11	66313783	66313793	11	0.0668087	-0.00575914	4.73194e-05	0.0226696	down	ENSG00000254458	NA	lncRNA	390	ENSG00000289560	NA	1
5	165542505	165542561	57	0.862111	0.00816592	4.76778e-05	0.0227678	up	ENSG00000253693	NA	lncRNA	66879	ENSG00000252794	RN7SKP60	0
7	57581080	57581126	47	0.287304	-0.0148468	4.76992e-05	0.0227678	down				18667	ENSG00000233601	NCOR1P3	0
17	74214884	74214924	41	0.622917	-0.00830098	4.77141e-05	0.0227678	down	ENSG00000141540	TTYH2	protein_coding	691	ENSG00000141540	TTYH2	1
3	103775849	103775857	9	0.906258	0.0052749	4.78984e-05	0.0228255	up				145187	ENSG00000243195	TUBBP11	0
7	151014763	151014903	141	0.742877	-0.00494021	4.80715e-05	0.0228778	down	ENSG00000181652	ATG9B	protein_coding	458	ENSG00000181652	ATG9B	1
19	16068384	16068472	89	0.413958	-0.00995538	4.82975e-05	0.0229377	down	ENSG00000167460	TPM4	protein_coding	650	ENSG00000167460	TPM4	1
17	38856236	38856365	130	0.397084	-0.0104802	4.83535e-05	0.0229377	down				921	ENSG00000244086	NA	1
4	137529711	137529759	49	0.891559	0.00489484	4.83884e-05	0.0229377	up	ENSG00000189184	PCDH18	protein_coding	134	ENSG00000189184	PCDH18	1
X	357913	358153	241	0.141065	-0.00783086	4.85343e-05	0.0229766	down	ENSG00000167393	PPP2R3B	protein_coding	3362	ENSG00000167393	PPP2R3B	0
7	102672850	102672981	132	0.912527	-0.00196641	4.86808e-05	0.0229843	down	ENSG00000279168	NA	lncRNA	1208	ENSG00000267645	NA	0
1	31588415	31588418	4	0.333536	-0.011227	4.87214e-05	0.0229843	down				3263	ENSG00000142910	TINAGL1	0
11	61554635	61554784	150	0.317142	-0.00808363	4.8742e-05	0.0229843	down	ENSG00000011347	SYT7	protein_coding	12375	ENSG00000256443	NA	0
3	195258836	195259104	269	0.102487	-0.00314162	4.88508e-05	0.0229919	down	ENSG00000173950	XXYLT1	protein_coding	975	ENSG00000173950	XXYLT1	1
1	155249601	155249811	211	0.571989	-0.00854802	4.88857e-05	0.0229919	down	ENSG00000160767	FAM189B	protein_coding	1996	ENSG00000160767	FAM189B	0
4	3464169	3464209	41	0.365061	-0.0152784	4.92062e-05	0.0230722	down	ENSG00000175920	DOK7	protein_coding	857	ENSG00000175920	DOK7	1
2	10046724	10046780	57	0.726631	-0.0105438	4.92089e-05	0.0230722	down	ENSG00000172059	KLF11	protein_coding	2478	ENSG00000172059	KLF11	0
22	19176567	19176647	81	0.770228	-0.00637663	4.92749e-05	0.0230722	down	ENSG00000100075	SLC25A1	protein_coding	1832	ENSG00000100075	SLC25A1	0
22	29765591	29765608	18	0.555018	-0.0112629	4.93125e-05	0.0230722	down	ENSG00000100319	ZMAT5	protein_coding	1398	ENSG00000100319	ZMAT5	0
5	178707596	178707665	70	0.835936	0.00601654	4.94331e-05	0.0230847	up	ENSG00000285978	NA	protein_coding	9900	ENSG00000285891	MSANTD5	0
19	33624019	33624139	121	0.487014	-0.00696872	4.94674e-05	0.0230847	down	ENSG00000124302	CHST8	protein_coding	2034	ENSG00000124302	CHST8	0
3	62852390	62852487	98	0.779184	0.00643818	4.9668e-05	0.0231483	up	ENSG00000163618	CADPS	protein_coding	22541	ENSG00000163618	CADPS	0
12	110484150	110484284	135	0.917796	0.0031063	4.97963e-05	0.0231781	up	ENSG00000204856	FAM216A	protein_coding	2016	ENSG00000204856	FAM216A	0
1	205753160	205753216	57	0.940883	-0.00412036	4.99208e-05	0.0232061	down				2977	ENSG00000069275	NUCKS1	0
15	77631639	77631737	99	0.0825166	-0.00378425	4.99901e-05	0.0232083	down	ENSG00000169783	LINGO1	protein_coding	1174	ENSG00000169783	LINGO1	0
19	1294827	1295057	231	0.497021	-0.00656487	5.03998e-05	0.0233549	down	ENSG00000099617	EFNA2	protein_coding	8953	ENSG00000099617	EFNA2	0
19	49020971	49021000	30	0.241016	-0.00967586	5.04355e-05	0.0233549	down				447	ENSG00000268655	NA	1
18	67727544	67727747	204	0.534154	0.0117283	5.09359e-05	0.0235564	up	ENSG00000265533;ENSG00000263594	DSEL-AS1;NA	lncRNA;lncRNA	19297	ENSG00000265472	FAM32DP	0
17	79025534	79025746	213	0.374934	-0.00973094	5.10851e-05	0.0235951	down	ENSG00000265096;ENSG00000173918	C1QTNF1-AS1;C1QTNF1	lncRNA;protein_coding	0	ENSG00000173918	C1QTNF1	1
5	22297125	22297317	193	0.728978	0.00875026	5.14838e-05	0.0237408	up	ENSG00000154162	CDH12	protein_coding	83374	ENSG00000154162	CDH12	0
12	94566516	94566574	59	0.952295	-0.00252114	5.15942e-05	0.0237408	down				4726	ENSG00000266099	MIR5700	0
9	9980330	9980533	204	0.648868	0.0114925	5.15982e-05	0.0237408	up	ENSG00000153707	PTPRD	protein_coding	180906	ENSG00000230920	NA	0
2	85618268	85618343	76	0.856503	-0.00506758	5.1882e-05	0.0238409	down	ENSG00000168883	USP39	protein_coding	1977	ENSG00000168883	USP39	0
2	182902635	182902688	54	0.920945	0.00395493	5.20149e-05	0.0238484	up				24576	ENSG00000061676	NCKAP1	0
16	29075966	29076169	204	0.855766	-0.00321962	5.20516e-05	0.0238484	down	ENSG00000260908;ENSG00000103472;ENSG00000284671	NA;RRN3P2;NA	transcribed_unprocessed_pseudogene;lncRNA;transcribed_unprocessed_pseudogene	943	ENSG00000284671	NA	1
11	130915240	130915360	121	0.188359	-0.00657633	5.21248e-05	0.0238484	down	ENSG00000120451	SNX19	protein_coding	1083	ENSG00000120451	SNX19	0
19	14531077	14531196	120	0.150521	-0.00639975	5.2163e-05	0.0238484	down	ENSG00000132002;ENSG00000099797	DNAJB1;TECR	protein_coding;protein_coding	1273	ENSG00000132002	DNAJB1	0
19	898790	898902	113	0.561467	-0.00716168	5.23617e-05	0.0239007	down	ENSG00000198858	R3HDM4	protein_coding	2333	ENSG00000198858	R3HDM4	0
9	136093379	136093471	93	0.225812	-0.00728175	5.24101e-05	0.0239007	down	ENSG00000148411	NACC2	protein_coding	1817	ENSG00000148411	NACC2	0
14	24431661	24431774	114	0.495362	-0.00954513	5.26963e-05	0.023952	down	ENSG00000100441	KHNYN	protein_coding	706	ENSG00000139899	CBLN3	1
10	45197156	45197205	50	0.524231	-0.013256	5.2735e-05	0.023952	down	ENSG00000278531	NA	unprocessed_pseudogene	1117	ENSG00000278531	NA	0
2	3577196	3577261	66	0.271633	-0.0118693	5.27507e-05	0.023952	down	ENSG00000171863	RPS7	protein_coding	1349	ENSG00000171863	RPS7	0
16	64750208	64750343	136	0.627275	0.0125637	5.27886e-05	0.023952	up				11884	ENSG00000260068	NA	0
17	27651894	27651961	68	0.657101	-0.0116557	5.29317e-05	0.0239574	down	ENSG00000265788	NOS2P1	transcribed_unprocessed_pseudogene	7767	ENSG00000168961	LGALS9	0
X	304351	304387	37	0.901897	0.00558509	5.29334e-05	0.0239574	up				8075	ENSG00000178605	GTPBP6	0
2	201641152	201641288	137	0.639056	-0.00679717	5.30259e-05	0.0239691	down	ENSG00000155755	TMEM237	protein_coding	1364	ENSG00000155755	TMEM237	0
11	2888315	2888338	24	0.613816	-0.0104474	5.31072e-05	0.0239758	down	ENSG00000254827	SLC22A18AS	protein_coding	1091	ENSG00000254827	SLC22A18AS	0
18	47748161	47748208	48	0.0400437	-0.0028489	5.32968e-05	0.0240313	down				44985	ENSG00000267187	NA	0
2	165367755	165367908	154	0.896732	0.00421414	5.35259e-05	0.0241044	up	ENSG00000136531	SCN2A	protein_coding	23199	ENSG00000136531	SCN2A	0
11	64715629	64715647	19	0.797369	-0.00794032	5.37928e-05	0.0241943	down	ENSG00000110076	NRXN2	protein_coding	1929	ENSG00000110076	NRXN2	0
14	69771219	69771421	203	0.654195	-0.0104802	5.40308e-05	0.0242431	down	ENSG00000100650	SRSF5	protein_coding	337	ENSG00000100650	SRSF5	1
7	86685628	86685645	18	0.622023	0.0107004	5.40358e-05	0.0242431	up	ENSG00000198822	GRM3	protein_coding	24453	ENSG00000198822	GRM3	0
13	67537048	67537093	46	0.78878	0.00874636	5.4111e-05	0.0242467	up				164660	ENSG00000230040	LINC00364	0
12	6969621	6969756	136	0.036815	-0.00188273	5.41954e-05	0.0242543	down	ENSG00000215021	PHB2	protein_coding	861	ENSG00000215021	PHB2	1
1	65239948	65239955	8	0.821053	0.00729429	5.43326e-05	0.0242855	up				8263	ENSG00000116675	DNAJC6	0
7	122064772	122064833	62	0.854225	0.00421162	5.4644e-05	0.0243915	up	ENSG00000008311	AASS	protein_coding	5397	ENSG00000106278	PTPRZ1	0
11	65420113	65420113	1	0.834338	-0.00679045	5.47051e-05	0.0243915	down				2660	ENSG00000245532	NEAT1	0
15	88436511	88436714	204	0.663882	0.0100643	5.49541e-05	0.0244529	up				28098	ENSG00000259494	MRPL46	0
2	113655096	113655103	8	0.894006	0.00663243	5.49786e-05	0.0244529	up				2804	ENSG00000144158	SNRPA1P1	0
1	16708994	16709011	18	0.868056	-0.00373185	5.52199e-05	0.02453	down	ENSG00000268869	ESPNP	transcribed_unprocessed_pseudogene	1607	ENSG00000268869	ESPNP	0
7	155370879	155370937	59	0.833691	-0.00500878	5.5432e-05	0.0245681	down				2944	ENSG00000204960	BLACE	0
20	62643672	62643875	204	0.100618	-0.00303728	5.5442e-05	0.0245681	down	ENSG00000101187	SLCO4A1	protein_coding	367	ENSG00000167046	NA	1
2	118844108	118844115	8	0.0862959	-0.00437782	5.5589e-05	0.0246029	down	ENSG00000163064	EN1	protein_coding	236	ENSG00000163064	EN1	1
3	76274560	76274695	136	0.871957	0.00795716	5.57257e-05	0.0246331	up	ENSG00000185008	ROBO2	protein_coding	36400	ENSG00000185008	ROBO2	0
1	228009260	228009409	150	0.514881	-0.00851066	5.58768e-05	0.0246697	down	ENSG00000154342	WNT3A	protein_coding	2261	ENSG00000154342	WNT3A	0
9	93578326	93578393	68	0.394075	-0.00861345	5.59828e-05	0.0246862	down	ENSG00000197724	PHF2	protein_coding	1578	ENSG00000197724	PHF2	0
11	119020563	119020692	130	0.616157	-0.0061488	5.60844e-05	0.0247008	down	ENSG00000196655	TRAPPC4	protein_coding	245	ENSG00000196655	TRAPPC4	1
21	25384173	25384309	137	0.791275	0.00810127	5.61735e-05	0.0247098	up				12345	ENSG00000279534	NA	0
19	1409480	1409632	153	0.19546	-0.00671862	5.63175e-05	0.0247429	down	ENSG00000071626	DAZAP1	protein_coding	191	ENSG00000071626	DAZAP1	1
9	133994396	133994409	14	0.261313	-0.00838683	5.64868e-05	0.0247791	down				1791	ENSG00000160293	VAV2	0
7	2553889	2553943	55	0.699503	-0.00865611	5.65374e-05	0.0247791	down	ENSG00000106009	BRAT1	protein_coding	503	ENSG00000106009	BRAT1	1
5	178561176	178561241	66	0.414178	-0.014919	5.66522e-05	0.0247951	down	ENSG00000050767	COL23A1	protein_coding	996	ENSG00000050767	COL23A1	1
12	109832198	109832367	170	0.872735	-0.00345748	5.67115e-05	0.0247951	down	ENSG00000111199	TRPV4	protein_coding	367	ENSG00000111199	TRPV4	1
12	99534835	99535005	171	0.691141	0.00743183	5.67986e-05	0.0248031	up	ENSG00000185046	ANKS1B	protein_coding	112747	ENSG00000180219	FAM71C	0
16	75528707	75528890	184	0.20419	-0.00463306	5.72904e-05	0.024987	down	ENSG00000135702;ENSG00000260092	CHST5;NA	protein_coding;protein_coding	6356	ENSG00000135702	CHST5	0
10	70254360	70254539	180	0.637163	-0.00952391	5.74051e-05	0.024987	down	ENSG00000148734	NPFFR1	protein_coding	20448	ENSG00000180817	PPA1	0
17	42823415	42823550	136	0.0739055	-0.00353426	5.74279e-05	0.024987	down	ENSG00000126581	BECN1	protein_coding	392	ENSG00000278447	MIR6781	1
5	134102216	134102265	50	0.159378	-0.00657558	5.75941e-05	0.0250291	down				12415	ENSG00000081059	TCF7	0
8	99360370	99360687	318	0.885847	0.00254129	5.78458e-05	0.0250843	up	ENSG00000132549	VPS13B	protein_coding	12113	ENSG00000225017	NA	0
7	101155952	101156089	138	0.533938	-0.00799024	5.78602e-05	0.0250843	down	ENSG00000106367	AP1S1	protein_coding	584	ENSG00000106367	AP1S1	1
12	6556637	6556673	37	0.152873	-0.00537869	5.81381e-05	0.0251744	down				563	ENSG00000010295	IFFO1	1
1	118993892	118993981	90	0.0558523	-0.00325703	5.85136e-05	0.0253066	down				4335	ENSG00000092607	TBX15	0
2	174329351	174329396	46	0.0288453	-0.00275186	5.87742e-05	0.0253527	down	ENSG00000231453	LINC01305	lncRNA	578	ENSG00000231453	LINC01305	1
3	186933009	186933064	56	0.296171	-0.0096703	5.8837e-05	0.0253527	down	ENSG00000073849	ST6GAL1	protein_coding	1656	ENSG00000073849	ST6GAL1	0
1	89997534	89997667	134	0.747818	-0.00576701	5.89687e-05	0.0253527	down	ENSG00000162664	ZNF326	protein_coding	2396	ENSG00000162664	ZNF326	0
7	100572697	100573173	477	0.866061	-0.00290968	5.89908e-05	0.0253527	down	ENSG00000205307;ENSG00000274272	SAP25;NA	protein_coding;lncRNA	0	ENSG00000205307	SAP25	1
10	103190671	103190731	61	0.370924	-0.0116009	5.90103e-05	0.0253527	down	ENSG00000076685	NT5C2	protein_coding	2529	ENSG00000076685	NT5C2	0
8	144393890	144394151	262	0.790521	-0.00455563	5.91126e-05	0.0253527	down	ENSG00000071894;ENSG00000284310	CPSF1;MIR939	protein_coding;miRNA	78	ENSG00000284310	MIR939	1
14	23303596	23303664	69	0.117636	-0.00480944	5.91432e-05	0.0253527	down	ENSG00000129473	BCL2L2	protein_coding	736	ENSG00000235194	PPP1R3E	1
9	136664706	136664869	164	0.374616	-0.00738312	5.91831e-05	0.0253527	down	ENSG00000172889	EGFL7	protein_coding	918	ENSG00000172889	EGFL7	1
16	84133462	84133469	8	0.962251	0.00221191	5.94419e-05	0.0254333	up	ENSG00000103160	HSDL1	protein_coding	8257	ENSG00000103160	HSDL1	0
1	156815040	156815129	90	0.664703	-0.0065018	5.95912e-05	0.0254617	down	ENSG00000027869	SH2D2A	protein_coding	281	ENSG00000027869	SH2D2A	1
8	4398554	4398617	64	0.748537	0.011685	5.97473e-05	0.0254617	up	ENSG00000183117	CSMD1	protein_coding	81165	ENSG00000286934	NA	0
14	104799539	104799573	35	0.186546	-0.00647095	5.97578e-05	0.0254617	down				1022	ENSG00000179627	ZBTB42	0
10	19485372	19485500	129	0.918468	0.00508671	5.98576e-05	0.0254617	up	ENSG00000204740	MALRD1	protein_coding	3094	ENSG00000204740	MALRD1	0
1	92507889	92508023	135	0.745766	0.00669101	5.98618e-05	0.0254617	up				20963	ENSG00000162676	GFI1	0
9	124125654	124125717	64	0.92938	-0.00282082	5.99796e-05	0.0254818	down				93129	ENSG00000234921	NA	0
19	46527179	46527179	1	0.975328	0.00340321	6.10833e-05	0.0259201	up	ENSG00000230510	PPP5D1P	transcribed_unprocessed_pseudogene	6489	ENSG00000278797	NA	0
11	64153187	64153334	148	0.731817	-0.00565537	6.12154e-05	0.0259456	down	ENSG00000133315	MACROD1	protein_coding	12440	ENSG00000133315	MACROD1	0
4	6009383	6009416	34	0.843465	-0.00504035	6.13597e-05	0.0259495	down	ENSG00000181215	C4orf50	protein_coding	19318	ENSG00000181215	C4orf50	0
4	33132053	33132114	62	0.22578	-0.00437551	6.13686e-05	0.0259495	down				18211	ENSG00000287968	NA	0
2	175229499	175229630	132	0.453093	0.0123093	6.15013e-05	0.0259751	up				27619	ENSG00000229066	NA	0
11	34054520	34054585	66	0.0732931	-0.0048829	6.16151e-05	0.0259927	down	ENSG00000135387	CAPRIN1	protein_coding	997	ENSG00000135387	CAPRIN1	1
20	23036608	23036675	68	0.153442	-0.00633487	6.17596e-05	0.0260232	down	ENSG00000234646;ENSG00000132671	NA;SSTR4	lncRNA;protein_coding	625	ENSG00000234646	NA	1
9	137453041	137453532	492	0.183787	-0.00346826	6.18725e-05	0.0260403	down	ENSG00000165802	NSMF	protein_coding	0	ENSG00000165802	NSMF	1
12	42588012	42588054	43	0.0983464	-0.00518609	6.19916e-05	0.02606	down	ENSG00000139174	PRICKLE1	protein_coding	1228	ENSG00000139174	PRICKLE1	0
7	15847288	15847349	62	0.896477	0.00508602	6.23318e-05	0.0261155	up				4927	ENSG00000229379	NA	0
11	46850969	46850986	18	0.804506	-0.00576901	6.23549e-05	0.0261155	down	ENSG00000247675	LRP4-AS1	lncRNA	4552	ENSG00000247675	LRP4-AS1	0
4	3894952	3894988	37	0.588338	0.00924981	6.23797e-05	0.0261155	up				4702	ENSG00000251166	OR7E163P	0
2	214454763	214454804	42	0.766214	0.00753629	6.24137e-05	0.0261155	up	ENSG00000197585;ENSG00000174453	NA;VWC2L	lncRNA;protein_coding	39799	ENSG00000197585	NA	0
19	2166515	2166679	165	0.69643	-0.00856544	6.28212e-05	0.0262358	down	ENSG00000104885	DOT1L	protein_coding	2046	ENSG00000065000	AP3D1	0
1	84922635	84922771	137	0.950144	0.00169907	6.28778e-05	0.0262358	up				7072	ENSG00000153898	MCOLN2	0
10	55647286	55647319	34	0.830814	0.00823763	6.29195e-05	0.0262358	up				19343	ENSG00000150275	PCDH15	0
3	85345047	85345113	67	0.862436	0.00641885	6.31697e-05	0.0263096	up	ENSG00000175161	CADM2	protein_coding	40596	ENSG00000264084	MIR5688	0
7	100117764	100117817	54	0.490452	-0.0129944	6.36441e-05	0.0264766	down	ENSG00000106290;ENSG00000242798	TAF6;NA	protein_coding;lncRNA	1158	ENSG00000106290	TAF6	0
19	1234547	1235149	603	0.93565	-0.00100401	6.37911e-05	0.0265072	down	ENSG00000099625	CBARP	protein_coding	0	ENSG00000099625	CBARP	1
16	254834	255046	213	0.137763	-0.00477205	6.39783e-05	0.0265478	down	ENSG00000167930	FAM234A	protein_coding	205	ENSG00000167930	FAM234A	1
19	4063617	4063702	86	0.654898	-0.00932598	6.40364e-05	0.0265478	down	ENSG00000178951	ZBTB7A	protein_coding	867	ENSG00000268670	NA	1
1	112390469	112390720	252	0.0282519	-0.00114203	6.42387e-05	0.0266011	down				5493	ENSG00000143079	CTTNBP2NL	0
16	73610190	73610348	159	0.497896	0.013647	6.45847e-05	0.0267	up	ENSG00000140836	ZFHX3	protein_coding	66248	ENSG00000260848	NA	0
4	175984354	175984392	39	0.796687	0.00723532	6.47324e-05	0.0267	up	ENSG00000150625	GPM6A	protein_coding	12365	ENSG00000150625	GPM6A	0
9	96644776	96644776	1	0.311879	-0.0138642	6.47404e-05	0.0267	down	ENSG00000158122	PRXL2C	protein_coding	9971	ENSG00000158122	PRXL2C	0
7	582390	582449	60	0.0552282	-0.00407574	6.4774e-05	0.0267	down	ENSG00000188191	PRKAR1B	protein_coding	20233	ENSG00000188191	PRKAR1B	0
12	13193573	13193636	64	0.580369	-0.00974818	6.48968e-05	0.0267097	down				3086	ENSG00000134531	EMP1	0
9	129079726	129079810	85	0.609669	-0.00807641	6.49459e-05	0.0267097	down				954	ENSG00000287234	NA	1
1	229406126	229406263	138	0.893891	-0.0029879	6.5085e-05	0.0267364	down				1097	ENSG00000288862	NA	0
19	2308897	2309100	204	0.259791	-0.00712416	6.53843e-05	0.0268288	down	ENSG00000273734	NA	protein_coding	7774	ENSG00000286880	NA	0
12	122981963	122982203	241	0.846082	-0.00424408	6.55892e-05	0.0268823	down	ENSG00000256028;ENSG00000182196	NA;ARL6IP4	lncRNA;protein_coding	9	ENSG00000182196	ARL6IP4	1
17	81868255	81868435	181	0.675582	-0.00724413	6.58754e-05	0.0269392	down	ENSG00000141522;ENSG00000262413	ARHGDIA;NA	protein_coding;lncRNA	194	ENSG00000141522	ARHGDIA	1
17	81915659	81915783	125	0.948986	-0.00155684	6.59167e-05	0.0269392	down	ENSG00000187531	SIRT7	protein_coding	142	ENSG00000187531	SIRT7	1
4	82338432	82338449	18	0.587537	0.00702348	6.59526e-05	0.0269392	up	ENSG00000284516	VAMP9P	transcribed_unitary_pseudogene	8392	ENSG00000273156	NA	0
7	74291390	74291447	58	0.557008	-0.0119836	6.62039e-05	0.0269909	down	ENSG00000106665	CLIP2	protein_coding	1914	ENSG00000106665	CLIP2	0
13	68975534	68975670	137	0.518029	0.0108383	6.6229e-05	0.0269909	up				9387	ENSG00000232380	ZDHHC20P4	0
7	80932204	80932376	173	0.695752	0.0125891	6.66688e-05	0.0271395	up				9844	ENSG00000075223	SEMA3C	0
4	48614987	48615117	131	0.921704	0.00415466	6.68852e-05	0.0271968	up	ENSG00000075539	FRYL	protein_coding	9140	ENSG00000075539	FRYL	0
12	131951294	131951476	183	0.0674733	-0.00255109	6.69962e-05	0.0272113	down	ENSG00000183495	EP400	protein_coding	1322	ENSG00000183495	EP400	0
19	6362614	6362947	334	0.280953	-0.00594959	6.78283e-05	0.0275182	down	ENSG00000125656	CLPP	protein_coding	464	ENSG00000269802	NA	1
15	74366754	74366810	57	0.0944653	-0.00388982	6.81756e-05	0.027566	down	ENSG00000140459;ENSG00000261821	CYP11A1;NA	protein_coding;lncRNA	547	ENSG00000140459	CYP11A1	1
2	241037162	241037370	209	0.45318	-0.0136824	6.81886e-05	0.027566	down	ENSG00000162804;ENSG00000225521	SNED1;SNED1-AS1	protein_coding;lncRNA	0	ENSG00000162804	SNED1	1
3	50291301	50291377	77	0.442582	-0.010768	6.82651e-05	0.027566	down	ENSG00000214706	IFRD2	protein_coding	671	ENSG00000214706	IFRD2	1
19	12751895	12751989	95	0.923877	-0.0022662	6.83364e-05	0.027566	down	ENSG00000039987	BEST2	protein_coding	103	ENSG00000039987	BEST2	1
6	163328296	163328317	22	0.784046	0.00585575	6.83427e-05	0.027566	up				3765	ENSG00000281692	PACRG-AS1	0
16	22539516	22539620	105	0.353095	0.00778665	6.84052e-05	0.027566	up				1931	ENSG00000277041	NA	0
13	44764670	44764722	53	0.844782	0.0103075	6.85477e-05	0.0275926	up				44907	ENSG00000235097	LINC00330	0
3	196870764	196870814	51	0.917694	-0.0032193	6.87609e-05	0.0276475	down	ENSG00000119231	SENP5	protein_coding	2818	ENSG00000119231	SENP5	0
19	5718199	5718249	51	0.115633	-0.00602931	6.91434e-05	0.0277703	down	ENSG00000196365	LONP1	protein_coding	1554	ENSG00000196365	LONP1	0
17	4941777	4941842	66	0.406984	-0.00808476	6.95277e-05	0.0278935	down	ENSG00000108523	RNF167	protein_coding	776	ENSG00000108523	RNF167	1
16	29923778	29924031	254	0.821758	-0.00421197	6.96666e-05	0.0279182	down	ENSG00000174943	KCTD13	protein_coding	416	ENSG00000174943	KCTD13	1
19	49681080	49681207	128	0.166317	-0.00466054	6.97634e-05	0.0279259	down	ENSG00000126457	PRMT1	protein_coding	909	ENSG00000274306	MIR5088	1
1	107570478	107570792	315	0.802044	0.00548539	6.98575e-05	0.0279325	up				65274	ENSG00000224550	NDUFA4P1	0
1	3393192	3393327	136	0.095515	-0.00306693	7.00371e-05	0.0279733	down	ENSG00000142611	PRDM16	protein_coding	3163	ENSG00000142611	PRDM16	0
11	62725310	62725358	49	0.0297502	-0.00396891	7.02502e-05	0.028005	down	ENSG00000234857;ENSG00000214753	HNRNPUL2-BSCL2;HNRNPUL2	protein_coding;protein_coding	1324	ENSG00000214753	HNRNPUL2	0
16	2008232	2008273	42	0.412673	-0.0100769	7.0272e-05	0.028005	down	ENSG00000167962	ZNF598	protein_coding	1490	ENSG00000167962	ZNF598	0
10	103660356	103660431	76	0.432677	-0.0136046	7.04368e-05	0.0280203	down	ENSG00000107957	SH3PXD2A	protein_coding	1272	ENSG00000107957	SH3PXD2A	0
13	59055913	59056050	138	0.850958	0.00356561	7.04658e-05	0.0280203	up				15752	ENSG00000232647	POLR3KP1	0
3	173573785	173573920	136	0.595669	0.00911085	7.06213e-05	0.0280511	up	ENSG00000169760	NLGN1	protein_coding	10634	ENSG00000169760	NLGN1	0
7	157273569	157273774	206	0.713234	-0.00451208	7.0775e-05	0.0280668	down				8911	ENSG00000229660	NA	0
20	50171435	50171500	66	0.371181	-0.0125679	7.0825e-05	0.0280668	down	ENSG00000234698	NA	lncRNA	308	ENSG00000231742	LINC01273	1
11	3219597	3219649	53	0.701079	-0.0146062	7.08946e-05	0.0280668	down	ENSG00000236301	MRGPRG-AS1	lncRNA	783	ENSG00000182170	MRGPRG	1
20	36094321	36094400	80	0.409087	-0.0073756	7.1019e-05	0.0280852	down	ENSG00000088367	EPB41L1	protein_coding	1483	ENSG00000088367	EPB41L1	0
19	3802229	3802318	90	0.772778	-0.00657483	7.12121e-05	0.0281177	down				99	ENSG00000007264	MATK	1
11	10292453	10292574	122	0.152897	-0.00657529	7.12571e-05	0.0281177	down	ENSG00000133812	SBF2	protein_coding	1494	ENSG00000133812	SBF2	0
13	84839230	84839290	61	0.732528	0.0113011	7.14164e-05	0.0281497	up				63133	ENSG00000288038	NA	0
7	37792272	37792336	65	0.729569	0.00897732	7.16056e-05	0.0281934	up	ENSG00000187037;ENSG00000086289	GPR141;EPDR1	protein_coding;protein_coding	3721	ENSG00000283444	GPR141BP	0
19	3705870	3705935	66	0.127339	-0.00667277	7.19781e-05	0.0283092	down				2426	ENSG00000105289	TJP3	0
6	110980729	110980781	53	0.428881	-0.014155	7.21412e-05	0.0283416	down				1233	ENSG00000197498	RPF2	0
22	17627082	17627425	344	0.280525	-0.00695634	7.2218e-05	0.0283416	down	ENSG00000131100	ATP6V1E1	protein_coding	1307	ENSG00000131100	ATP6V1E1	0
4	8411624	8411700	77	0.866174	-0.00529093	7.25503e-05	0.0284167	down	ENSG00000087008	ACOX3	protein_coding	4154	ENSG00000087008	ACOX3	0
14	68814395	68814417	23	0.764209	-0.00687978	7.25669e-05	0.0284167	down				18141	ENSG00000185650	ZFP36L1	0
X	931194	931312	119	0.72565	0.00642531	7.27334e-05	0.0284437	up				58908	ENSG00000237531	NA	0
19	57826980	57826991	12	0.858192	0.00926292	7.28719e-05	0.0284437	up	ENSG00000268750;ENSG00000269343	NA;ZNF587B	protein_coding;protein_coding	201	ENSG00000269304	FKBP1AP1	1
17	1866720	1866757	38	0.925586	-0.00620943	7.28729e-05	0.0284437	down	ENSG00000132383	RPA1	protein_coding	5369	ENSG00000132383	RPA1	0
8	144393689	144393785	97	0.12798	-0.00644672	7.36113e-05	0.0286951	down	ENSG00000071894	CPSF1	protein_coding	444	ENSG00000284310	MIR939	1
14	37751915	37752121	207	0.652378	0.0105929	7.36826e-05	0.0286951	up	ENSG00000139865	TTC6	protein_coding	20261	ENSG00000139865	TTC6	0
3	195873673	195873765	93	0.411614	-0.0141462	7.37558e-05	0.0286951	down	ENSG00000061938	TNK2	protein_coding	866	ENSG00000061938	TNK2	1
3	109335408	109335589	182	0.792079	-0.00740069	7.39499e-05	0.0287396	down	ENSG00000121570	DPPA4	protein_coding	841	ENSG00000121570	DPPA4	1
2	78991383	78991438	56	0.172565	-0.00548731	7.4111e-05	0.0287536	down				34247	ENSG00000143954	REG3G	0
20	39549957	39550104	148	0.967661	-0.00164917	7.41457e-05	0.0287536	down				113447	ENSG00000286083	NA	0
4	2819164	2819218	55	0.579354	-0.00821873	7.43045e-05	0.0287781	down	ENSG00000087266	SH3BP2	protein_coding	349	ENSG00000087266	SH3BP2	1
2	193584047	193584091	45	0.805096	0.00679055	7.43686e-05	0.0287781	up				146597	ENSG00000224219	SEC61GP1	0
19	13964724	13964777	54	0.629419	-0.0078375	7.47052e-05	0.0288773	down	ENSG00000132005	RFX1	protein_coding	668	ENSG00000132005	RFX1	1
12	27012867	27012985	119	0.218994	-0.00818754	7.48868e-05	0.0289165	down	ENSG00000064115	TM7SF3	protein_coding	28	ENSG00000064115	TM7SF3	1
11	78235127	78235448	322	0.951157	0.0011864	7.52004e-05	0.0290065	up	ENSG00000033327	GAB2	protein_coding	3194	ENSG00000033327	GAB2	0
13	71477281	71477417	137	0.390382	0.0115989	7.56589e-05	0.0291521	up	ENSG00000276644	DACH1	protein_coding	181070	ENSG00000225801	RABEPKP1	0
11	67607948	67608084	137	0.123058	-0.0024882	7.58083e-05	0.0291736	down	ENSG00000167792	NDUFV1	protein_coding	141	ENSG00000167792	NDUFV1	1
2	25375530	25375595	66	0.696873	-0.0107146	7.58765e-05	0.0291736	down	ENSG00000235072	ARNILA	lncRNA	249	ENSG00000235072	ARNILA	1
21	36058837	36058861	25	0.71996	-0.00983348	7.62613e-05	0.0292545	down	ENSG00000185917	SETD4	protein_coding	1380	ENSG00000185917	SETD4	0
11	64925631	64925853	223	0.74256	-0.00711721	7.64958e-05	0.0292545	down	ENSG00000068971	PPP2R5B	protein_coding	909	ENSG00000068971	PPP2R5B	1
12	132275085	132275237	153	0.929182	-0.00244888	7.65178e-05	0.0292545	down	ENSG00000182870	GALNT9	protein_coding	0	ENSG00000182870	GALNT9	1
11	70177878	70178066	189	0.252969	-0.00710347	7.65337e-05	0.0292545	down	ENSG00000131620	ANO1	protein_coding	7912	ENSG00000131620	ANO1	0
14	83285392	83285594	203	0.622184	0.00911235	7.65567e-05	0.0292545	up				236812	ENSG00000252369	RNU7-51P	0
12	52925091	52925219	129	0.945344	-0.00228953	7.68084e-05	0.0292545	down	ENSG00000170421	KRT8	protein_coding	1249	ENSG00000170421	KRT8	0
18	3035437	3035547	111	0.73909	0.0123601	7.68588e-05	0.0292545	up				9870	ENSG00000252258	SNORA70	0
8	122175473	122175586	114	0.902445	0.00431485	7.68639e-05	0.0292545	up				48288	ENSG00000254303	NA	0
2	130230949	130231130	182	0.673094	-0.0126714	7.68818e-05	0.0292545	down	ENSG00000213225	NOC2LP1	transcribed_processed_pseudogene	224	ENSG00000213225	NOC2LP1	1
1	11274702	11274767	66	0.612811	-0.0094982	7.69319e-05	0.0292545	down	ENSG00000120942	UBIAD1	protein_coding	767	ENSG00000120942	UBIAD1	1
2	9579162	9579215	54	0.878428	0.00582064	7.69803e-05	0.0292545	up				22429	ENSG00000151694	ADAM17	0
19	43753553	43753751	199	0.118944	-0.00464545	7.7218e-05	0.029314	down	ENSG00000105771	SMG9	protein_coding	846	ENSG00000105771	SMG9	1
19	3490536	3490545	10	0.422793	-0.0165407	7.75491e-05	0.0293624	down				3625	ENSG00000129932	DOHH	0
3	103775948	103775982	35	0.745758	0.0100323	7.75716e-05	0.0293624	up				145286	ENSG00000243195	TUBBP11	0
16	86865021	86865047	27	0.938388	-0.00322252	7.759e-05	0.0293624	down				34308	ENSG00000287161	NA	0
5	28684641	28684843	203	0.803333	0.00584297	7.79657e-05	0.0294453	up	ENSG00000250453	NA	lncRNA	59983	ENSG00000252867	RNU6-909P	0
1	31588243	31588325	83	0.629004	-0.0103746	7.80167e-05	0.0294453	down				3091	ENSG00000142910	TINAGL1	0
7	75046237	75046518	282	0.936885	-0.00158295	7.80544e-05	0.0294453	down	ENSG00000274523	RCC1L	protein_coding	11358	ENSG00000277127	Metazoa_SRP	0
11	2272785	2272873	89	0.84068	-0.005574	7.83835e-05	0.0295	down				2196	ENSG00000183734	ASCL2	0
15	41113990	41114051	62	0.644137	-0.00870146	7.84295e-05	0.0295	down	ENSG00000128908	INO80	protein_coding	2080	ENSG00000128908	INO80	0
10	15762099	15762223	125	0.857229	0.0045896	7.8445e-05	0.0295	up				20111	ENSG00000148481	MINDY3	0
11	821252	821323	72	0.80182	-0.00647087	7.86904e-05	0.0295614	down	ENSG00000177666	PNPLA2	protein_coding	416	ENSG00000177666	PNPLA2	1
7	38234991	38235060	70	0.796985	0.00882951	7.89093e-05	0.0296128	up				14511	ENSG00000227191	TRGC2	0
16	2225566	2225768	203	0.893458	-0.00221137	7.91181e-05	0.0296602	down	ENSG00000167967	E4F1	protein_coding	1849	ENSG00000167967	E4F1	0
13	83586499	83586568	70	0.633441	0.0116145	7.94226e-05	0.029734	up				68220	ENSG00000286446	NA	0
7	55953543	55953593	51	0.828058	-0.00640034	7.948e-05	0.029734	down	ENSG00000249773;ENSG00000146729;ENSG00000239789	NA;NIPSNAP2;MRPS17	protein_coding;protein_coding;protein_coding	1579	ENSG00000239789	MRPS17	0
3	152962250	152962277	28	0.907072	0.00383222	7.96227e-05	0.0297352	up				105000	ENSG00000241810	HMGN2P13	0
20	63949201	63949295	95	0.422301	-0.00867809	7.96483e-05	0.0297352	down	ENSG00000198276	UCKL1	protein_coding	1830	ENSG00000198276	UCKL1	0
14	104341732	104341783	52	0.23025	-0.0075602	7.97645e-05	0.0297478	down				37167	ENSG00000258598	NA	0
19	18595453	18595479	27	0.591049	-0.0112184	8.0236e-05	0.0298927	down	ENSG00000006016	CRLF1	protein_coding	1017	ENSG00000006016	CRLF1	0
3	126343009	126343022	14	0.406544	-0.00940648	8.04055e-05	0.0299249	down	ENSG00000163884	KLF15	protein_coding	11262	ENSG00000163884	KLF15	0
17	63537595	63537733	139	0.318946	-0.00607751	8.04922e-05	0.0299263	down	ENSG00000173826	KCNH6	protein_coding	12488	ENSG00000136485	DCAF7	0
2	94862999	94863130	132	0.749235	0.0124483	8.07318e-05	0.0299554	up				1636	ENSG00000278631	SOWAHCP5	0
4	1041498	1041559	62	0.575216	-0.00855365	8.07368e-05	0.0299554	down				13819	ENSG00000250259	NA	0
12	93518431	93518634	204	0.672413	0.00932817	8.09351e-05	0.029998	up				8943	ENSG00000243015	RN7SL737P	0
12	3774201	3774261	61	0.838262	0.00852101	8.11877e-05	0.0300607	up				9381	ENSG00000130038	CRACR2A	0
16	1963335	1963473	139	0.840297	-0.00402692	8.1292e-05	0.0300684	down	ENSG00000140988	RPS2	protein_coding	78	ENSG00000140988	RPS2	1
12	123268369	123268407	39	0.590787	-0.0108458	8.20288e-05	0.0302984	down	ENSG00000111328	CDK2AP1	protein_coding	51	ENSG00000111328	CDK2AP1	1
9	136197315	136197473	159	0.454405	-0.0115368	8.2082e-05	0.0302984	down	ENSG00000107187	LHX3	protein_coding	4200	ENSG00000107187	LHX3	0
8	10928162	10928259	98	0.23078	-0.00833859	8.21702e-05	0.0302999	down	ENSG00000171044	XKR6	protein_coding	68725	ENSG00000280294	NA	0
11	72237599	72237765	167	0.881122	-0.00293387	8.28514e-05	0.0304324	down	ENSG00000165458	INPPL1	protein_coding	0	ENSG00000165458	INPPL1	1
19	16302790	16302850	61	0.887225	0.00626418	8.29687e-05	0.0304324	up	ENSG00000267275	KLF2-DT	lncRNA	9214	ENSG00000267275	KLF2-DT	0
9	78200648	78200755	108	0.951735	0.00258921	8.31963e-05	0.0304324	up				18364	ENSG00000234819	NA	0
13	59613886	59614020	135	0.582746	0.00787372	8.32386e-05	0.0304324	up				82172	ENSG00000139734	DIAPH3	0
17	29289464	29289517	54	0.832419	-0.00732222	8.33538e-05	0.0304324	down	ENSG00000108256	NUFIP2	protein_coding	4597	ENSG00000108256	NUFIP2	0
5	178831371	178831433	63	0.453134	-0.0128867	8.34375e-05	0.0304324	down				5988	ENSG00000274813	NA	0
13	84665356	84665413	58	0.769646	0.010418	8.34817e-05	0.0304324	up				102991	ENSG00000233349	LINC00333	0
5	1010578	1010644	67	0.763239	-0.00763819	8.34827e-05	0.0304324	down	ENSG00000145506	NKD2	protein_coding	1615	ENSG00000145506	NKD2	0
6	13706617	13706859	243	0.0673965	-0.00312951	8.35562e-05	0.0304324	down	ENSG00000010017	RANBP9	protein_coding	4975	ENSG00000010017	RANBP9	0
13	103978503	103978503	1	0.79381	0.00861763	8.36066e-05	0.0304324	up				147426	ENSG00000287734	NA	0
17	83050092	83050142	51	0.163875	-0.00758044	8.36192e-05	0.0304324	down	ENSG00000175711	B3GNTL1	protein_coding	925	ENSG00000175711	B3GNTL1	1
1	106522796	106522967	172	0.668768	0.0099714	8.36242e-05	0.0304324	up				21776	ENSG00000270342	NA	0
16	2539240	2539376	137	0.0752741	-0.00339924	8.36275e-05	0.0304324	down	ENSG00000140992	PDPK1	protein_coding	1075	ENSG00000140992	PDPK1	0
18	63424041	63424178	138	0.228926	-0.00570575	8.42442e-05	0.0305667	down				1557	ENSG00000119541	VPS4B	0
11	69706320	69706448	129	0.582429	-0.0102576	8.43931e-05	0.0305667	down				2297	ENSG00000162344	FGF19	0
1	156676194	156676274	81	0.0423556	-0.00215647	8.44743e-05	0.0305667	down	ENSG00000132688	NES	protein_coding	1132	ENSG00000132688	NES	0
5	45425025	45425041	17	0.787956	0.00710849	8.44772e-05	0.0305667	up	ENSG00000164588	HCN1	protein_coding	55094	ENSG00000164588	HCN1	0
16	1970703	1970904	202	0.700283	-0.00624351	8.44853e-05	0.0305667	down				991	ENSG00000277602	NA	1
1	226702118	226702254	137	0.0818464	-0.00317977	8.45845e-05	0.0305667	down	ENSG00000143772	ITPKB	protein_coding	27028	ENSG00000228382	ITPKB-IT1	0
16	51656324	51656335	12	0.964658	0.0027734	8.45905e-05	0.0305667	up				10567	ENSG00000224578	HNRNPA1P48	0
3	13654997	13655284	288	0.0399605	-0.00159361	8.47872e-05	0.0305902	down	ENSG00000224514	LINC00620	lncRNA	4263	ENSG00000224514	LINC00620	0
2	77193531	77193747	217	0.824877	0.00674493	8.48253e-05	0.0305902	up	ENSG00000176204	LRRTM4	protein_coding	133355	ENSG00000286932	NA	0
15	69721506	69721551	46	0.0826751	-0.00504767	8.49632e-05	0.0306093	down	ENSG00000245750	DRAIC	lncRNA	28995	ENSG00000245750	DRAIC	0
11	14970019	14970046	28	0.173491	-0.00957751	8.50984e-05	0.0306273	down	ENSG00000175868;ENSG00000110680	CALCB;CALCA	protein_coding;protein_coding	2	ENSG00000110680	CALCA	1
19	46492324	46492427	104	0.735576	-0.00825963	8.53418e-05	0.0306843	down	ENSG00000230510;ENSG00000204851	PPP5D1P;PNMA8B	transcribed_unprocessed_pseudogene;protein_coding	2080	ENSG00000204850	NA	0
19	11890100	11890106	7	0.635876	-0.0087565	8.57433e-05	0.0307782	down	ENSG00000198429	ZNF69	protein_coding	2244	ENSG00000198429	ZNF69	0
19	44909668	44909756	89	0.425104	-0.00860109	8.57737e-05	0.0307782	down	ENSG00000280087	NA	TEC	292	ENSG00000280087	NA	1
3	127599352	127599409	58	0.288306	-0.0108325	8.595e-05	0.0307978	down	ENSG00000073111	MCM2	protein_coding	69	ENSG00000073111	MCM2	1
8	92584186	92584211	26	0.812924	0.00665005	8.59994e-05	0.0307978	up	ENSG00000253634	NA	lncRNA	71357	ENSG00000253634	NA	0
5	179119931	179119956	26	0.682552	-0.0106245	8.61301e-05	0.030814	down	ENSG00000087116	ADAMTS2	protein_coding	1897	ENSG00000087116	ADAMTS2	0
5	135467364	135467428	65	0.0634107	-0.00398434	8.62365e-05	0.0308214	down				15012	ENSG00000255833	TIFAB	0
16	77232770	77233002	233	0.301969	0.00658656	8.64769e-05	0.0308767	up	ENSG00000261063	NA	lncRNA	1874	ENSG00000260922	NA	0
20	62239388	62240014	627	0.0538334	-0.00185831	8.68955e-05	0.0309955	down	ENSG00000130703	OSBPL2	protein_coding	438	ENSG00000130703	OSBPL2	1
1	27633639	27633660	22	0.663861	-0.00660274	8.70892e-05	0.0310338	down	ENSG00000000938	FGR	protein_coding	1473	ENSG00000000938	FGR	0
21	45975690	45975800	111	0.824487	-0.00571422	8.73662e-05	0.031101	down	ENSG00000289224	NA	lncRNA	1200	ENSG00000274248	NA	0
3	136140630	136140783	154	0.913434	0.00311218	8.74504e-05	0.031101	up	ENSG00000073711	PPP2R3A	protein_coding	14765	ENSG00000241438	TDGF1P6	0
3	128485570	128485606	37	0.303244	-0.0100337	8.79217e-05	0.0312282	down	ENSG00000179348	GATA2	protein_coding	2309	ENSG00000179348	GATA2	0
1	113075085	113075137	53	0.109906	-0.00513014	8.80578e-05	0.0312282	down	ENSG00000198799	LRIG2	protein_coding	1886	ENSG00000198799	LRIG2	0
1	211583979	211584022	44	0.962213	-0.00185086	8.80682e-05	0.0312282	down				253	ENSG00000261314	NA	1
5	21087443	21087534	92	0.444624	0.0101917	8.83651e-05	0.0313027	up				54597	ENSG00000286751	NA	0
19	11889534	11889613	80	0.892453	-0.00272886	8.85291e-05	0.03133	down	ENSG00000198429	ZNF69	protein_coding	1678	ENSG00000198429	ZNF69	0
15	56448914	56448914	1	0.796173	0.00854473	8.86648e-05	0.0313451	up	ENSG00000138587	MNS1	protein_coding	1793	ENSG00000277245	NA	0
10	17732167	17732302	136	0.857947	0.00554784	8.87802e-05	0.0313451	up				19898	ENSG00000148483	TMEM236	0
17	79992590	79992706	117	0.163352	-0.0049668	8.88327e-05	0.0313451	down	ENSG00000167291;ENSG00000262172	TBC1D16;NA	protein_coding;lncRNA	134	ENSG00000262172	NA	1
17	2174666	2174751	86	0.87272	-0.0034278	8.89225e-05	0.0313461	down	ENSG00000070366	SMG6	protein_coding	1487	ENSG00000070366	SMG6	0
5	172452606	172452650	45	0.78844	-0.00668942	8.935e-05	0.031466	down	ENSG00000174705	SH3PXD2B	protein_coding	1657	ENSG00000174705	SH3PXD2B	0
13	114130575	114130732	158	0.280282	-0.00694667	8.95706e-05	0.0315128	down	ENSG00000185989	RASA3	protein_coding	1890	ENSG00000185989	RASA3	0
16	50108523	50108644	122	0.946516	0.00340019	8.96888e-05	0.0315237	up	ENSG00000260381	NA	lncRNA	10258	ENSG00000202124	RNY4P3	0
1	1200461	1200625	165	0.279243	-0.0082856	8.9967e-05	0.0315271	down				5054	ENSG00000186891	TNFRSF18	0
8	112686610	112686643	34	0.124179	0.00611172	8.99856e-05	0.0315271	up	ENSG00000164796	CSMD3	protein_coding	3398	ENSG00000164796	CSMD3	0
20	63498168	63498497	330	0.22915	-0.00902755	9.01058e-05	0.0315271	down	ENSG00000101210	EEF1A2	protein_coding	250	ENSG00000101210	EEF1A2	1
6	92033243	92033361	119	0.831218	0.00540879	9.01113e-05	0.0315271	up	ENSG00000285961	NA	lncRNA	19400	ENSG00000220553	RPL5P19	0
17	8158423	8158484	62	0.0738497	-0.00210718	9.01562e-05	0.0315271	down	ENSG00000263620	NA	protein_coding	1916	ENSG00000179094	PER1	0
16	87604864	87605063	200	0.254764	-0.00754318	9.02587e-05	0.0315271	down	ENSG00000154118	JPH3	protein_coding	1976	ENSG00000154118	JPH3	0
11	14969813	14969868	56	0.375204	-0.0144507	9.03112e-05	0.0315271	down	ENSG00000175868;ENSG00000110680	CALCB;CALCA	protein_coding;protein_coding	147	ENSG00000110680	CALCA	1
7	6010609	6010745	137	0.805321	-0.00356896	9.04148e-05	0.0315327	down	ENSG00000106305	AIMP2	protein_coding	1292	ENSG00000106305	AIMP2	0
7	5549278	5549278	1	0.960619	-0.0045785	9.11419e-05	0.0317469	down	ENSG00000075624	ACTB	protein_coding	7452	ENSG00000272719	NA	0
3	190782070	190782265	196	0.314881	0.011297	9.12053e-05	0.0317469	up				48699	ENSG00000214147	NA	0
17	45582829	45582894	66	0.352642	-0.00837728	9.16787e-05	0.0317789	down	ENSG00000214425	LRRC37A4P	transcribed_unprocessed_pseudogene	1810	ENSG00000214425	LRRC37A4P	0
14	46881302	46881348	47	0.909657	0.00569991	9.17138e-05	0.0317789	up	ENSG00000139915	MDGA2	protein_coding	873	ENSG00000139915	MDGA2	1
14	23323005	23323070	66	0.314242	-0.00952013	9.17939e-05	0.0317789	down	ENSG00000258643;ENSG00000100836	BCL2L2-PABPN1;PABPN1	protein_coding;protein_coding	192	ENSG00000100836	PABPN1	1
13	107380700	107380835	136	0.569679	0.0119649	9.18312e-05	0.0317789	up	ENSG00000204442	NALF1	protein_coding	59736	ENSG00000201847	SNORD31B	0
16	89974213	89974516	304	0.0991908	-0.00438416	9.18537e-05	0.0317789	down	ENSG00000223959	AFG3L1P	transcribed_unitary_pseudogene	1564	ENSG00000223959	AFG3L1P	0
1	33367933	33368191	259	0.909978	-0.00160744	9.18908e-05	0.0317789	down	ENSG00000134686	PHC2	protein_coding	7401	ENSG00000134686	PHC2	0
13	111412576	111412742	167	0.39654	-0.00606961	9.19146e-05	0.0317789	down				91933	ENSG00000153495	TEX29	0
2	241216994	241217236	243	0.106838	-0.00307402	9.20714e-05	0.0317841	down	ENSG00000146205	ANO7	protein_coding	378	ENSG00000146205	ANO7	1
9	137592036	137592099	64	0.299652	-0.00939332	9.21062e-05	0.0317841	down				1523	ENSG00000165724	ZMYND19	0
7	100582863	100583023	161	0.944296	-0.00258602	9.22388e-05	0.0317994	down	ENSG00000077454	LRCH4	protein_coding	409	ENSG00000077454	LRCH4	1
7	101179031	101179240	210	0.0333808	-0.00190417	9.24353e-05	0.0318367	down	ENSG00000167011	NAT16	protein_coding	0	ENSG00000167011	NAT16	1
6	32144357	32144417	61	0.673016	-0.00730674	9.27881e-05	0.0319277	down				5439	ENSG00000204314	PRRT1	0
17	4909086	4909217	132	0.81949	-0.00452592	9.30485e-05	0.0319868	down	ENSG00000108556	CHRNE	protein_coding	5987	ENSG00000108556	CHRNE	0
X	153725828	153725981	154	0.772883	-0.0116483	9.31832e-05	0.0320025	down	ENSG00000101986	ABCD1	protein_coding	10	ENSG00000101986	ABCD1	1
2	85058275	85058307	33	0.215734	0.0108637	9.37212e-05	0.0321355	up	ENSG00000176407	KCMF1	protein_coding	9039	ENSG00000260840	LINC01964	0
20	3676681	3676746	66	0.0970494	-0.00711991	9.37715e-05	0.0321355	down	ENSG00000149451	ADAM33	protein_coding	2933	ENSG00000149451	ADAM33	0
14	23579319	23579347	29	0.545062	-0.0104932	9.38521e-05	0.0321355	down				528	ENSG00000092051	JPH4	1
22	38270731	38270769	39	0.643295	-0.00706782	9.39273e-05	0.0321355	down	ENSG00000198792	TMEM184B	protein_coding	1894	ENSG00000198792	TMEM184B	0
19	57743091	57743261	171	0.635839	0.013726	9.4023e-05	0.0321378	up	ENSG00000269026	NA	protein_coding	3553	ENSG00000152443	ZNF776	0
2	231396766	231396884	119	0.358733	-0.00641867	9.41614e-05	0.0321545	down	ENSG00000156966	B3GNT7	protein_coding	291	ENSG00000156966	B3GNT7	1
14	102546315	102546503	189	0.205923	-0.00683944	9.44562e-05	0.0322247	down	ENSG00000259230	LINC02323	lncRNA	1060	ENSG00000259230	LINC02323	0
8	22368697	22368832	136	0.594011	-0.00871649	9.45493e-05	0.0322259	down	ENSG00000104635	SLC39A14	protein_coding	1158	ENSG00000104635	SLC39A14	0
20	5453469	5453583	115	0.123563	-0.00740102	9.48392e-05	0.0322942	down	ENSG00000266908;ENSG00000226995;ENSG00000230563	NA;LINC00658;NA	lncRNA;lncRNA;lncRNA	7422	ENSG00000226995	LINC00658	0
13	89711718	89711718	1	0.759506	0.0126794	9.51218e-05	0.0323598	up	ENSG00000271395	LINC02336	lncRNA	122222	ENSG00000234227	RPL7L1P1	0
16	67748241	67748285	45	0.966657	-0.00206036	9.55092e-05	0.032461	down	ENSG00000141084	RANBP10	protein_coding	8318	ENSG00000270165	NA	0
17	61782107	61782243	137	0.600605	0.0113686	9.6011e-05	0.0326008	up	ENSG00000136492	BRIP1	protein_coding	1438	ENSG00000136492	BRIP1	0
13	88880479	88880618	140	0.883323	0.00596147	9.62854e-05	0.0326631	up				98166	ENSG00000233211	GRPEL2P1	0
8	1975813	1975934	122	0.049424	-0.0020945	9.64501e-05	0.0326882	down	ENSG00000253696;ENSG00000176595	KBTBD11-OT1;KBTBD11	lncRNA;protein_coding	994	ENSG00000270988	NA	1
7	19438890	19438955	66	0.498588	0.013793	9.6568e-05	0.0326974	up	ENSG00000223838	NA	lncRNA	85355	ENSG00000223838	NA	0
16	86931369	86931509	141	0.531309	-0.00821833	9.67721e-05	0.0327201	down	ENSG00000287161;ENSG00000289423	NA;NA	lncRNA;lncRNA	0	ENSG00000289423	NA	1
11	62575965	62576047	83	0.540563	-0.00859523	9.69765e-05	0.0327201	down	ENSG00000255508;ENSG00000149016	NA;TUT1	protein_coding;protein_coding	804	ENSG00000255508	NA	1
3	48846377	48846648	272	0.143295	-0.00384639	9.72469e-05	0.0327201	down	ENSG00000114302	PRKAR2A	protein_coding	923	ENSG00000224424	PRKAR2A-AS1	1
5	63422836	63422836	1	0.54938	0.012792	9.73064e-05	0.0327201	up				121312	ENSG00000248185	NA	0
5	374864	374979	116	0.548719	-0.00762547	9.73315e-05	0.0327201	down	ENSG00000288622;ENSG00000063438	PDCD6-AHRR;AHRR	protein_coding;protein_coding	29566	ENSG00000214278	NA	0
7	155412529	155413067	539	0.873822	-0.00324164	9.74064e-05	0.0327201	down	ENSG00000288051	NA	lncRNA	0	ENSG00000288051	NA	1
13	104840710	104840844	135	0.86079	0.00470306	9.74269e-05	0.0327201	up				26382	ENSG00000225823	RPL7P45	0
8	47627774	47627835	62	0.524953	-0.0119031	9.74318e-05	0.0327201	down	ENSG00000164808	SPIDR	protein_coding	26252	ENSG00000164808	SPIDR	0
16	84616222	84616239	18	0.443056	-0.0115527	9.74808e-05	0.0327201	down	ENSG00000103187	COTL1	protein_coding	1319	ENSG00000103187	COTL1	0
13	19963073	19963128	56	0.757635	-0.00795204	9.75431e-05	0.0327201	down	ENSG00000121741	ZMYM2	protein_coding	3213	ENSG00000121741	ZMYM2	0
19	33232763	33232830	68	0.479777	-0.00771988	9.77023e-05	0.032743	down				6912	ENSG00000130876	SLC7A10	0
9	137578010	137578089	80	0.0832687	-0.0040438	9.78069e-05	0.0327476	down	ENSG00000148399	DPH7	protein_coding	450	ENSG00000148399	DPH7	1
5	129585198	129585326	129	0.906258	0.00364673	9.80275e-05	0.0327555	up	ENSG00000145808;ENSG00000251680	ADAMTS19;NA	protein_coding;lncRNA	102773	ENSG00000145808	ADAMTS19	0
17	65863489	65863582	94	0.8774	0.00728216	9.80829e-05	0.0327555	up	ENSG00000154240	CEP112	protein_coding	10065	ENSG00000154240	CEP112	0
8	143637642	143637711	70	0.0571911	-0.00287515	9.81032e-05	0.0327555	down	ENSG00000183309	ZNF623	protein_coding	1479	ENSG00000183309	ZNF623	0
2	96738772	96738834	63	0.326915	-0.00938635	9.8681e-05	0.0328973	down	ENSG00000114988	LMAN2L	protein_coding	1206	ENSG00000114988	LMAN2L	0
19	38184667	38184698	32	0.29599	-0.0118779	9.87106e-05	0.0328973	down	ENSG00000105738;ENSG00000269653	SIPA1L3;NA	protein_coding;lncRNA	290	ENSG00000269653	NA	1
8	38378227	38378288	62	0.454428	-0.00898011	9.89265e-05	0.0329388	down	ENSG00000147548	NSD3	protein_coding	2532	ENSG00000147548	NSD3	0
9	132587784	132588188	405	0.30802	-0.00859633	9.92433e-05	0.0330137	down	ENSG00000125492	BARHL1	protein_coding	5124	ENSG00000125492	BARHL1	0
3	129608157	129608370	214	0.115069	-0.0039514	9.99736e-05	0.0332114	down				1480	ENSG00000004399	PLXND1	0
2	20649542	20649690	149	0.910835	-0.00328927	0.000100022	0.0332114	down	ENSG00000118960	HS1BP3	protein_coding	1372	ENSG00000118960	HS1BP3	0
7	155531780	155531997	218	0.501327	-0.00953421	0.000100299	0.0332727	down	ENSG00000146910;ENSG00000283128	CNPY1;NA	protein_coding;protein_coding	1840	ENSG00000146910	CNPY1	0
22	48499812	48499887	76	0.949318	-0.00222752	0.00010042	0.0332822	down	ENSG00000219438	TAFA5	protein_coding	10219	ENSG00000219438	TAFA5	0
19	19133718	19133724	7	0.95865	-0.00215203	0.000100631	0.0332872	down	ENSG00000064545	TMEM161A	protein_coding	1316	ENSG00000064545	TMEM161A	0
X	29807471	29807540	70	0.673078	0.0136238	0.000100753	0.0332872	up	ENSG00000169306	IL1RAPL1	protein_coding	109922	ENSG00000169306	IL1RAPL1	0
7	1571737	1571868	132	0.687288	-0.00622524	0.000100774	0.0332872	down	ENSG00000230487	PSMG3-AS1	lncRNA	731	ENSG00000157778	PSMG3	1
14	44268527	44268731	205	0.825747	0.00453123	0.000100805	0.0332872	up	ENSG00000258969	LINC02307	lncRNA	22986	ENSG00000259148	YWHAZP1	0
11	105146444	105146505	62	0.620604	0.0113538	0.000101313	0.0334232	up	ENSG00000255501	CARD18	protein_coding	6674	ENSG00000255501	CARD18	0
7	100719976	100720030	55	0.251398	-0.00869982	0.000101474	0.0334232	down				437	ENSG00000130427	EPO	1
9	113664653	113664716	64	0.920949	0.00398335	0.00010152	0.0334232	up	ENSG00000227482	NA	lncRNA	13696	ENSG00000227482	NA	0
17	41862651	41862700	50	0.845137	-0.00466001	0.000101645	0.0334232	down	ENSG00000178502	KLHL11	protein_coding	2722	ENSG00000178502	KLHL11	0
4	39374480	39374524	45	0.383078	0.0146077	0.00010168	0.0334232	up				8104	ENSG00000035928	RFC1	0
5	161213698	161213739	42	0.295399	0.00923456	0.000102416	0.0336343	up				191194	ENSG00000145864	GABRB2	0
16	88939540	88939604	65	0.0222241	-0.00150491	0.000102733	0.0337079	down	ENSG00000129993;ENSG00000261226	CBFA2T3;NA	protein_coding;lncRNA	46	ENSG00000261226	NA	1
3	136010519	136010583	65	0.942794	-0.00397299	0.000103574	0.0339526	down	ENSG00000073711	PPP2R3A	protein_coding	12151	ENSG00000073711	PPP2R3A	0
11	69986969	69987080	112	0.334608	-0.0122664	0.000103826	0.0340045	down	ENSG00000255191;ENSG00000131620	NA;ANO1	lncRNA;protein_coding	1061	ENSG00000131620	ANO1	0
11	63920558	63920570	13	0.268697	-0.0119685	0.000104032	0.0340333	down				3393	ENSG00000167771	RCOR2	0
13	23678014	23678217	204	0.187689	-0.00711143	0.000104103	0.0340333	down				36975	ENSG00000289332	NA	0
1	227954117	227954140	24	0.534847	-0.010693	0.000104263	0.0340546	down				6184	ENSG00000143816	WNT9A	0
5	180126129	180126332	204	0.151757	-0.0049127	0.000104375	0.0340603	down	ENSG00000146090	RASGEF1C	protein_coding	8979	ENSG00000146090	RASGEF1C	0
3	191262110	191262143	34	0.719834	0.0121128	0.000104558	0.0340894	up	ENSG00000188729	OSTN	protein_coding	20117	ENSG00000188958	UTS2B	0
19	49589582	49589594	13	0.618356	-0.00774454	0.000104671	0.0340954	down	ENSG00000142546;ENSG00000126460	NOSIP;PRRG2	protein_coding;protein_coding	667	ENSG00000142546	NOSIP	1
9	93949858	93949909	52	0.24718	-0.0125583	0.00010526	0.034242	down				3521	ENSG00000131668	BARX1	0
6	121512692	121512823	132	0.917887	0.00348812	0.000105312	0.034242	up				29802	ENSG00000201379	RNU4-76P	0
16	11827021	11827081	61	0.235283	-0.00738369	0.000105511	0.0342653	down	ENSG00000262117	BCAR4	lncRNA	1729	ENSG00000262117	BCAR4	0
6	34202916	34202964	49	0.0412434	-0.00282656	0.000105574	0.0342653	down				13135	ENSG00000271231	KRT18P9	0
9	124774855	124774886	32	0.749772	-0.00796137	0.000105846	0.0342947	down				2246	ENSG00000185585	OLFML2A	0
5	179025744	179025745	2	0.739712	-0.00887114	0.000105855	0.0342947	down	ENSG00000234284	ZNF879	protein_coding	1305	ENSG00000234284	ZNF879	0
22	28774160	28774225	66	0.112606	-0.0073034	0.000106169	0.0343469	down	ENSG00000159873	CCDC117	protein_coding	918	ENSG00000159873	CCDC117	1
12	53223498	53223575	78	0.027671	-0.00197471	0.000106206	0.0343469	down	ENSG00000172819	RARG	protein_coding	3084	ENSG00000172819	RARG	0
15	50883340	50883593	254	0.781856	0.0108432	0.000106415	0.0343551	up	ENSG00000273674	NA	lncRNA	2324	ENSG00000273674	NA	0
8	1976158	1976246	89	0.0888215	-0.00305579	0.000106423	0.0343551	down	ENSG00000253696;ENSG00000176595	KBTBD11-OT1;KBTBD11	lncRNA;protein_coding	1339	ENSG00000270988	NA	0
18	57410552	57410585	34	0.0510389	-0.00282417	0.000106606	0.0343834	down				16547	ENSG00000277837	NA	0
4	21441302	21441439	138	0.857695	0.00397855	0.000106721	0.0343897	up	ENSG00000185774	KCNIP4	protein_coding	23318	ENSG00000283281	MIR7978	0
8	110181746	110181882	137	0.574209	0.0107684	0.000107122	0.0344883	up				75781	ENSG00000240590	RPSAP48	0
9	137298936	137299008	73	0.174086	-0.00588937	0.000107437	0.0345587	down	ENSG00000288234	NA	lncRNA	3214	ENSG00000260996	NA	0
11	61381700	61381904	205	0.0971395	-0.00341744	0.000108021	0.0347157	down				10488	ENSG00000187049	TMEM216	0
10	2777031	2777074	44	0.823954	0.00517676	0.000108129	0.0347194	up				48763	ENSG00000286858	NA	0
19	1019363	1019400	38	0.150758	-0.0108661	0.000108368	0.0347345	down	ENSG00000182087	TMEM259	protein_coding	1450	ENSG00000182087	TMEM259	0
1	191493690	191493752	63	0.378031	0.0114479	0.000108436	0.0347345	up				265222	ENSG00000233882	LINC01680	0
17	28840786	28840832	47	0.1287	-0.00624933	0.000108465	0.0347345	down	ENSG00000173065	FAM222B	protein_coding	1894	ENSG00000173065	FAM222B	0
17	82230557	82231637	1081	0.0132291	-0.000567486	0.000108831	0.0348206	down	ENSG00000141526	SLC16A3	protein_coding	594	ENSG00000141526	SLC16A3	1
11	76959713	76959850	138	0.969071	0.00157265	0.000109092	0.0348549	up	ENSG00000078124;ENSG00000254988	ACER3;NA	protein_coding;lncRNA	16453	ENSG00000078124	ACER3	0
8	143079436	143079552	117	0.488474	-0.0081263	0.000109132	0.0348549	down				1077	ENSG00000261667	LY6L	0
1	155587163	155587365	203	0.177598	-0.0055743	0.000109356	0.0348955	down	ENSG00000225082	DAP3P1	unprocessed_pseudogene	518	ENSG00000225082	DAP3P1	1
16	28622275	28622412	138	0.508266	-0.00856402	0.000111089	0.0354172	down	ENSG00000288656;ENSG00000196502	NA;SULT1A1	protein_coding;protein_coding	839	ENSG00000196502	SULT1A1	1
2	113654547	113654749	203	0.884711	0.00621404	0.000111711	0.0355602	up				3158	ENSG00000144158	SNRPA1P1	0
7	32911699	32911819	121	0.950338	0.00219156	0.000111735	0.0355602	up				17567	ENSG00000170852	KBTBD2	0
2	131090821	131090891	71	0.629707	-0.0122804	0.000111981	0.0355815	down	ENSG00000152102	FAM168B	protein_coding	2536	ENSG00000152102	FAM168B	0
22	41856892	41856952	61	0.938718	-0.00211332	0.000112056	0.0355815	down	ENSG00000198911	SREBF2	protein_coding	16736	ENSG00000198911	SREBF2	0
12	42455547	42455580	34	0.824922	0.00871589	0.000112098	0.0355815	up	ENSG00000134283	PPHLN1	protein_coding	826	ENSG00000207142	Y_RNA	1
22	48488421	48488480	60	0.294872	-0.0121343	0.000112411	0.0356495	down	ENSG00000287225	NA	lncRNA	0	ENSG00000287225	NA	1
13	80286124	80286328	205	0.900912	0.00485074	0.00011335	0.0358849	up				53330	ENSG00000136158	SPRY2	0
22	19176372	19176484	113	0.645347	-0.00714801	0.000113353	0.0358849	down	ENSG00000100075	SLC25A1	protein_coding	1995	ENSG00000100075	SLC25A1	0
1	193280099	193280168	70	0.669063	0.00831326	0.000113467	0.0358894	up				24576	ENSG00000232077	LINC01031	0
22	40949618	40949681	64	0.199484	-0.00677932	0.000113602	0.0359007	down				1665	ENSG00000100387	RBX1	0
1	47532777	47532799	23	0.304628	-0.00758948	0.000113798	0.0359141	down				17396	ENSG00000227883	ATP6V0E1P4	0
22	36527426	36527563	138	0.626538	-0.00715119	0.000113844	0.0359141	down	ENSG00000100353	EIF3D	protein_coding	1333	ENSG00000100353	EIF3D	0
16	10946577	10946640	64	0.735561	-0.00830206	0.000113958	0.0359188	down	ENSG00000038532	CLEC16A	protein_coding	1995	ENSG00000038532	CLEC16A	0
13	99567142	99567306	165	0.12461	-0.00319676	0.000114348	0.0359908	down				9805	ENSG00000234168	LINC01039	0
6	166957963	166958003	41	0.592031	-0.00739486	0.000114586	0.0359908	down				771	ENSG00000026297	RNASET2	1
4	1722866	1723046	181	0.447215	-0.0102903	0.00011462	0.0359908	down	ENSG00000013810	TACC3	protein_coding	63	ENSG00000013810	TACC3	1
9	125221768	125221793	26	0.974097	0.00186404	0.000114697	0.0359908	up	ENSG00000136933	RABEPK	protein_coding	19548	ENSG00000044574	HSPA5	0
20	63217148	63217239	92	0.161541	-0.00505818	0.000114707	0.0359908	down				801	ENSG00000273821	NA	1
16	30523924	30523979	56	0.333293	-0.00954957	0.000114786	0.0359908	down				2586	ENSG00000169957	ZNF768	0
1	51329771	51329796	26	0.537233	-0.00814497	0.000114962	0.0360146	down	ENSG00000085831;ENSG00000261664	TTC39A;TTC39A-AS1	protein_coding;lncRNA	20	ENSG00000261664	TTC39A-AS1	1
17	81834802	81835302	501	0.617037	-0.00916677	0.000116009	0.0363109	down	ENSG00000182676	PPP1R27	protein_coding	0	ENSG00000182676	PPP1R27	1
19	35691958	35692214	257	0.189246	-0.00436542	0.000116416	0.0364069	down				7756	ENSG00000267190	TYMSP2	0
18	75778383	75778416	34	0.952852	0.00384814	0.000116642	0.0364459	up				65531	ENSG00000261194	LINC01898	0
13	83554567	83554578	12	0.425842	0.0133268	0.000117004	0.036472	up				100210	ENSG00000286446	NA	0
10	75208938	75209057	120	0.138373	-0.00571535	0.000117054	0.036472	down				1096	ENSG00000165637	VDAC2	0
8	22053478	22053618	141	0.961122	-0.00188468	0.000117085	0.036472	down	ENSG00000158856	DMTN	protein_coding	0	ENSG00000158856	DMTN	1
19	1583845	1583915	71	0.569718	-0.00739807	0.000117131	0.036472	down	ENSG00000071655;ENSG00000267059	MBD3;NA	protein_coding;protein_coding	657	ENSG00000071655	MBD3	1
1	151252215	151252284	70	0.798921	0.00897283	0.000117331	0.0364803	up				2424	ENSG00000159352	PSMD4	0
17	19239639	19239655	17	0.673109	-0.0121359	0.00011736	0.0364803	down	ENSG00000072134	EPN2	protein_coding	2141	ENSG00000072134	EPN2	0
5	138109010	138109035	26	0.711928	-0.00682303	0.000117602	0.0365162	down				7345	ENSG00000112981	NME5	0
12	6132637	6132865	229	0.0262551	-0.00172407	0.000117678	0.0365162	down				7866	ENSG00000110799	VWF	0
6	89148073	89148275	203	0.0471393	-0.00226484	0.000117982	0.0365633	down	ENSG00000146281	PM20D2	protein_coding	2017	ENSG00000146281	PM20D2	0
9	85289407	85289472	66	0.0582754	-0.00370248	0.000118033	0.0365633	down				55440	ENSG00000287930	NA	0
1	209004302	209004356	55	0.0829455	-0.00411113	0.000118262	0.036575	down				2963	ENSG00000278684	NA	0
3	173947154	173947180	27	0.93043	0.00272119	0.000118274	0.036575	up	ENSG00000169760	NLGN1	protein_coding	26357	ENSG00000228213	NLGN1-AS1	0
21	46326735	46326789	55	0.436946	-0.0122538	0.000118544	0.0366084	down	ENSG00000160299	PCNT	protein_coding	446	ENSG00000286224	NA	1
14	74017808	74018039	232	0.260709	-0.00523679	0.000118585	0.0366084	down	ENSG00000187097	ENTPD5	protein_coding	1231	ENSG00000187097	ENTPD5	0
14	74301222	74301317	96	0.117202	-0.00595811	0.00011896	0.0366926	down	ENSG00000119688	ABCD4	protein_coding	1592	ENSG00000119688	ABCD4	0
4	171303676	171303850	175	0.787272	0.0083681	0.000119239	0.0367473	up				5408	ENSG00000248339	LINC02504	0
1	3012592	3013031	440	0.043177	-0.00115107	0.000119938	0.0368686	down				8435	ENSG00000169717	ACTRT2	0
12	25201942	25201958	17	0.845264	0.00725137	0.000119939	0.0368686	up	ENSG00000205707	ETFRF1	protein_coding	6388	ENSG00000205707	ETFRF1	0
11	60934992	60935186	195	0.563392	-0.00757462	0.00012001	0.0368686	down	ENSG00000006118	TMEM132A	protein_coding	131	ENSG00000006118	TMEM132A	1
9	136201128	136201279	152	0.358418	-0.0096438	0.000120042	0.0368686	down	ENSG00000107187	LHX3	protein_coding	394	ENSG00000107187	LHX3	1
19	2050173	2050375	203	0.0441064	-0.00229768	0.000120897	0.0370995	down	ENSG00000099875	MKNK2	protein_coding	477	ENSG00000099875	MKNK2	1
4	91498065	91498120	56	0.494155	0.0116262	0.000121038	0.037107	up	ENSG00000184305	CCSER1	protein_coding	105154	ENSG00000279013	NA	0
3	60910981	60911016	36	0.880171	-0.00513425	0.000121127	0.037107	down	ENSG00000189283	FHIT	protein_coding	54375	ENSG00000212211	U3	0
1	1348040	1348157	118	0.570026	-0.00688394	0.000121825	0.037289	down	ENSG00000107404	DVL1	protein_coding	797	ENSG00000107404	DVL1	1
18	56596124	56596332	209	0.734348	0.00716408	0.000122855	0.0375726	up				4532	ENSG00000091164	TXNL1	0
12	56220376	56220513	138	0.427738	-0.00684845	0.000123708	0.0378011	down	ENSG00000181852	RNF41	protein_coding	1187	ENSG00000181852	RNF41	0
11	67390351	67390676	326	0.353504	-0.00705336	0.000123937	0.037839	down	ENSG00000172613	RAD9A	protein_coding	1028	ENSG00000172613	RAD9A	0
2	9143659	9143707	49	0.427347	-0.0118594	0.000124202	0.0378879	down	ENSG00000240980	NA	lncRNA	492	ENSG00000240980	NA	1
7	147430786	147430921	136	0.76627	0.00910606	0.000124313	0.0378898	up	ENSG00000174469	CNTNAP2	protein_coding	52664	ENSG00000221442	MIR548F4	0
14	24335692	24335779	88	0.580561	-0.00957679	0.00012473	0.037922	down	ENSG00000258973	NA	lncRNA	598	ENSG00000129467	ADCY4	1
16	80810687	80810860	174	0.862721	0.00613916	0.000124793	0.037922	up				6088	ENSG00000166446	CDYL2	0
19	12093699	12093749	51	0.0973703	-0.0043549	0.000124825	0.037922	down	ENSG00000286132;ENSG00000214189;ENSG00000132010	NA;ZNF788P;ZNF20	protein_coding;transcribed_unprocessed_pseudogene;protein_coding	1230	ENSG00000214189	ZNF788P	0
1	45519756	45519787	32	0.244986	-0.0113318	0.00012484	0.037922	down	ENSG00000117450	PRDX1	protein_coding	2066	ENSG00000117450	PRDX1	0
11	108518736	108518834	99	0.922934	-0.00212047	0.000124972	0.037924	down	ENSG00000110723	EXPH5	protein_coding	19352	ENSG00000110723	EXPH5	0
5	64575898	64575926	29	0.898181	0.00462704	0.000125057	0.037924	up	ENSG00000186479	RGS7BP	protein_coding	215	ENSG00000186479	RGS7BP	1
11	63975706	63975876	171	0.0992948	-0.00395158	0.000125328	0.0379375	down	ENSG00000256100;ENSG00000176340	NA;COX8A	protein_coding;protein_coding	1085	ENSG00000256100	NA	0
19	1511885	1511933	49	0.802103	-0.00559287	0.000125405	0.0379375	down	ENSG00000185761;ENSG00000185988	ADAMTSL5;PLK5	protein_coding;protein_coding	748	ENSG00000185761	ADAMTSL5	1
1	28815631	28815743	113	0.431407	-0.0115953	0.000125417	0.0379375	down	ENSG00000116329	OPRD1	protein_coding	3460	ENSG00000116329	OPRD1	0
20	63942898	63942921	24	0.341962	-0.0109982	0.000125971	0.0380728	down	ENSG00000198276	UCKL1	protein_coding	171	ENSG00000207554	MIR647	1
3	84717400	84717469	70	0.960945	0.00221193	0.000126087	0.0380761	up	ENSG00000242641	LINC00971	lncRNA	21774	ENSG00000242641	LINC00971	0
4	1416409	1416456	48	0.158191	-0.00838876	0.000126225	0.0380857	down				9966	ENSG00000235608	NKX1-1	0
2	129741829	129741839	11	0.800801	-0.00830101	0.000126563	0.0381558	down				135564	ENSG00000229536	LINC02572	0
17	30694427	30694586	160	0.769276	-0.00559032	0.000126834	0.0382054	down				8188	ENSG00000241631	RN7SL316P	0
1	28739543	28739597	55	0.537107	-0.0114352	0.000127011	0.038227	down	ENSG00000198492	YTHDF2	protein_coding	451	ENSG00000198492	YTHDF2	1
1	53944366	53944539	174	0.0817015	-0.00394014	0.000127425	0.0383104	down	ENSG00000081870	HSPB11	protein_coding	1032	ENSG00000081870	HSPB11	0
1	47435269	47435319	51	0.0639938	-0.00339001	0.000127501	0.0383104	down				627	ENSG00000237424	FOXD2-AS1	1
7	17848134	17848227	94	0.95847	0.00189781	0.000127901	0.0383716	up	ENSG00000071189	SNX13	protein_coding	26436	ENSG00000071189	SNX13	0
1	155192835	155193007	173	0.725594	-0.00666655	0.000127918	0.0383716	down	ENSG00000185499	MUC1	protein_coding	0	ENSG00000185499	MUC1	1
6	94859461	94859568	108	0.55392	0.0128987	0.000128196	0.0384179	up				123522	ENSG00000289178	NA	0
19	1094143	1094231	89	0.0968704	-0.0043682	0.00012834	0.0384179	down	ENSG00000099817	POLR2E	protein_coding	1029	ENSG00000099817	POLR2E	0
12	22701031	22701074	44	0.538415	0.0146991	0.000128436	0.0384179	up	ENSG00000256995	NA	lncRNA	1002	ENSG00000256995	NA	0
18	44496124	44496153	30	0.628857	0.0128025	0.000128499	0.0384179	up	ENSG00000267337	LINC01478	lncRNA	26212	ENSG00000277899	MLECP1	0
3	197728985	197729132	148	0.337615	0.0112676	0.00012877	0.0384672	up	ENSG00000145016	RUBCN	protein_coding	7771	ENSG00000145016	RUBCN	0
17	48622946	48623097	152	0.779026	-0.00537531	0.000128992	0.0385015	down	ENSG00000260027;ENSG00000170689	HOXB7;HOXB9	protein_coding;protein_coding	3260	ENSG00000170689	HOXB9	0
10	54250375	54250579	205	0.895012	0.00411909	0.000129357	0.0385468	up	ENSG00000150275	PCDH15	protein_coding	54528	ENSG00000150275	PCDH15	0
10	132181765	132181919	155	0.876852	-0.00337187	0.000129358	0.0385468	down	ENSG00000188385;ENSG00000235010	JAKMIP3;NA	protein_coding;lncRNA	0	ENSG00000188385	JAKMIP3	1
14	90852875	90852891	17	0.365361	0.0126399	0.000129524	0.0385486	up	ENSG00000100784	RPS6KA5	protein_coding	24672	ENSG00000258884	LINC02321	0
11	367796	367997	202	0.90342	-0.00269396	0.000129644	0.0385486	down				1501	ENSG00000182272	B4GALNT4	0
3	102469019	102469135	117	0.729121	0.00864706	0.00012974	0.0385486	up	ENSG00000170044	ZPLD1	protein_coding	34003	ENSG00000170044	ZPLD1	0
12	25726799	25726849	51	0.148854	-0.00438107	0.000129808	0.0385486	down				52719	ENSG00000222950	RN7SKP262	0
20	63408839	63408851	13	0.781209	-0.0088799	0.000129899	0.0385486	down	ENSG00000075043	KCNQ2	protein_coding	354	ENSG00000075043	KCNQ2	1
16	3030540	3030577	38	0.643631	-0.00766909	0.000130035	0.0385573	down	ENSG00000162069	BICDL2	protein_coding	1396	ENSG00000162069	BICDL2	0
17	78351550	78351723	174	0.691574	-0.00678997	0.000130375	0.038618	down				8350	ENSG00000184557	SOCS3	0
4	32764000	32764041	42	0.486435	0.0108922	0.000130454	0.038618	up				18474	ENSG00000286784	NA	0
10	17615689	17615733	45	0.030599	-0.00162656	0.000130749	0.0386449	down	ENSG00000165996	HACD1	protein_coding	1501	ENSG00000165996	HACD1	0
4	55339110	55339225	116	0.680452	0.0112119	0.0001308	0.0386449	up				6987	ENSG00000128039	SRD5A3	0
17	81936318	81936521	204	0.255122	-0.00729472	0.000130926	0.0386449	down	ENSG00000183010	PYCR1	protein_coding	253	ENSG00000183010	PYCR1	1
22	50306240	50306270	31	0.198322	-0.00697259	0.000130974	0.0386449	down	ENSG00000196576	PLXNB2	protein_coding	1332	ENSG00000196576	PLXNB2	0
14	105249775	105249900	126	0.0286986	-0.00127949	0.000131209	0.0386826	down	ENSG00000185024;ENSG00000184887	BRF1;BTBD6	protein_coding;protein_coding	370	ENSG00000185024	BRF1	1
X	1280339	1280396	58	0.889245	0.00596783	0.000131363	0.0386962	up	ENSG00000198223	CSF2RA	protein_coding	2289	ENSG00000198223	CSF2RA	0
17	4740526	4740670	145	0.206235	-0.0054495	0.000131739	0.0387532	down	ENSG00000141497	ZMYND15	protein_coding	6	ENSG00000141497	ZMYND15	1
17	80662935	80662956	22	0.256599	-0.00958735	0.000131816	0.0387532	down	ENSG00000141564	RPTOR	protein_coding	45976	ENSG00000141564	RPTOR	0
12	111037315	111037568	254	0.0428818	-0.00198247	0.000131879	0.0387532	down	ENSG00000111249	CUX2	protein_coding	3149	ENSG00000111249	CUX2	0
6	70529924	70529958	35	0.89964	0.00489854	0.000132154	0.0388023	up	ENSG00000082269	FAM135A	protein_coding	5948	ENSG00000082269	FAM135A	0
9	137296886	137297103	218	0.181299	-0.0048499	0.000132449	0.0388386	down	ENSG00000288234	NA	lncRNA	1164	ENSG00000260996	NA	0
3	50319891	50320252	362	0.356354	-0.00656219	0.000132493	0.0388386	down	ENSG00000068001;ENSG00000114383	HYAL2;TUSC2	protein_coding;protein_coding	695	ENSG00000068001	HYAL2	1
10	58073459	58073489	31	0.888396	0.00531698	0.000132737	0.0388556	up				33389	ENSG00000232115	NA	0
3	117159564	117159682	119	0.90111	0.00311766	0.000132767	0.0388556	up				20174	ENSG00000185565	LSAMP	0
19	13156580	13156623	44	0.191146	-0.00611287	0.000133027	0.0389001	down				2164	ENSG00000213253	RPL12P42	0
11	68282270	68282336	67	0.912874	0.00320093	0.000133264	0.0389379	up	ENSG00000286369	NA	lncRNA	10167	ENSG00000286369	NA	0
19	52192400	52192610	211	0.845486	-0.00361691	0.000133863	0.0390811	down	ENSG00000105568	PPP2R1A	protein_coding	2285	ENSG00000105568	PPP2R1A	0
20	50111358	50111358	1	0.178271	-0.00803688	0.000135021	0.0393873	down	ENSG00000124208;ENSG00000244687	PEDS1-UBE2V1;UBE2V1	protein_coding;protein_coding	207	ENSG00000244687	UBE2V1	1
2	234954014	234954126	113	0.130196	-0.00615951	0.000135694	0.039538	down	ENSG00000130147	SH3BP4	protein_coding	1937	ENSG00000130147	SH3BP4	0
8	144605503	144605880	378	0.952026	-0.0014453	0.000135828	0.039538	down	ENSG00000147799	ARHGAP39	protein_coding	0	ENSG00000147799	ARHGAP39	1
2	144513544	144513741	198	0.0943574	-0.00484599	0.000135867	0.039538	down	ENSG00000169554	ZEB2	protein_coding	709	ENSG00000169554	ZEB2	1
2	240962567	240962927	361	0.832084	-0.00511651	0.00013601	0.0395469	down	ENSG00000226321;ENSG00000233392	CROCC2;UICLM	protein_coding;lncRNA	2766	ENSG00000233392	UICLM	0
10	66303727	66303751	25	0.934045	0.00283176	0.000136117	0.0395469	up	ENSG00000183230	CTNNA3	protein_coding	224483	ENSG00000273360	NA	0
19	6196692	6197058	367	0.534238	-0.0121724	0.000137174	0.0398061	down	ENSG00000087903	RFX2	protein_coding	2346	ENSG00000284490	NA	0
1	3219428	3219564	137	0.87844	-0.00330455	0.00013723	0.0398061	down	ENSG00000142611	PRDM16	protein_coding	13439	ENSG00000279839	NA	0
5	170503111	170503161	51	0.620468	-0.010602	0.00013761	0.0398437	down	ENSG00000182132	KCNIP1	protein_coding	858	ENSG00000182132	KCNIP1	1
1	3794852	3794979	128	0.12328	-0.00367268	0.000137697	0.0398437	down	ENSG00000130764	LRRC47	protein_coding	1518	ENSG00000130764	LRRC47	0
1	53237109	53237262	154	0.0490373	-0.00215628	0.000137731	0.0398437	down	ENSG00000162385	MAGOH	protein_coding	1236	ENSG00000162385	MAGOH	0
20	62817782	62817972	191	0.427874	-0.0073686	0.000138045	0.0398437	down	ENSG00000092758	COL9A3	protein_coding	0	ENSG00000092758	COL9A3	1
X	979155	979279	125	0.575661	0.0108543	0.000138237	0.0398437	up				10941	ENSG00000237531	NA	0
10	101774161	101774200	40	0.315832	-0.0111574	0.00013828	0.0398437	down	ENSG00000107831	FGF8	protein_coding	1699	ENSG00000107831	FGF8	0
17	17238075	17238150	76	0.0101133	0.00114549	0.000138348	0.0398437	up				886	ENSG00000154803	FLCN	1
19	49020470	49020493	24	0.0222658	-0.00158418	0.000138368	0.0398437	down	ENSG00000268655	NA	protein_coding	29	ENSG00000268655	NA	1
20	48372269	48372270	2	0.346681	-0.011377	0.000138438	0.0398437	down				4292	ENSG00000286063	NA	0
4	117831813	117831947	135	0.94005	0.00271476	0.000138547	0.0398437	up				2197	ENSG00000229565	LINC02264	0
18	46914314	46914314	1	0.421199	-0.0138963	0.000138597	0.0398437	down	ENSG00000078043	PIAS2	protein_coding	1308	ENSG00000279354	NA	0
3	71245122	71245191	70	0.0612175	-0.0031384	0.000138687	0.0398437	down	ENSG00000114861;ENSG00000285708	FOXP1;NA	protein_coding;protein_coding	0	ENSG00000114861	FOXP1	1
1	45483466	45483580	115	0.672337	-0.00830741	0.000139182	0.0399542	down	ENSG00000288208;ENSG00000070759	NA;TESK2	protein_coding;protein_coding	7574	ENSG00000288208	NA	0
1	93145692	93145750	59	0.845026	0.00906772	0.000139655	0.0400581	up				16896	ENSG00000143033	MTF2	0
2	47370658	47370666	9	0.0925061	-0.00422119	0.000140089	0.0401505	down	ENSG00000119888	EPCAM	protein_coding	1162	ENSG00000119888	EPCAM	0
21	46146909	46147073	165	0.511533	-0.00854361	0.000140669	0.0402848	down	ENSG00000160282	FTCD	protein_coding	0	ENSG00000160282	FTCD	1
13	82990386	82990520	135	0.901125	0.00345588	0.000141151	0.0403905	up	ENSG00000286385	NA	lncRNA	111814	ENSG00000286385	NA	0
17	82375901	82375955	55	0.108126	-0.00562836	0.000141551	0.0404724	down	ENSG00000181408	UTS2R	protein_coding	4135	ENSG00000181408	UTS2R	0
5	181178793	181178881	89	0.130403	-0.00402292	0.000141747	0.0404724	down	ENSG00000248473	LINC01962	lncRNA	10571	ENSG00000248473	LINC01962	0
15	65028370	65028523	154	0.0520211	-0.0021697	0.000141774	0.0404724	down	ENSG00000103707	MTFMT	protein_coding	1008	ENSG00000103707	MTFMT	0
7	80020215	80020257	43	0.801709	0.00908228	0.000142029	0.0405131	up	ENSG00000127955	GNAI1	protein_coding	76957	ENSG00000230853	RPL10P11	0
X	5086155	5086325	171	0.881592	0.00426476	0.000142329	0.040543	up				83113	ENSG00000235039	MTND6P12	0
X	963141	963260	120	0.800902	0.00608654	0.000142359	0.040543	up				26960	ENSG00000237531	NA	0
20	35615026	35615242	217	0.261978	-0.00665516	0.000142749	0.0405727	down				586	ENSG00000061656	SPAG4	1
1	109088570	109088875	306	0.24113	-0.00473065	0.000142905	0.0405727	down	ENSG00000273382	TMEM167B-DT	lncRNA	1888	ENSG00000215717	TMEM167B	0
19	42069985	42070074	90	0.958467	-0.00216117	0.000142989	0.0405727	down	ENSG00000105737;ENSG00000105732	GRIK5;ZNF574	protein_coding;protein_coding	131	ENSG00000105737	GRIK5	1
5	42948431	42948496	66	0.492637	-0.00805856	0.000143044	0.0405727	down				24127	ENSG00000250711	PRELID3BP7	0
5	154991202	154991271	70	0.961186	0.0021453	0.000143045	0.0405727	up				2326	ENSG00000253261	NA	0
11	62444673	62444724	52	0.249308	0.00896287	0.000143193	0.0405727	up	ENSG00000124942	AHNAK	protein_coding	17948	ENSG00000255446	NA	0
3	190782527	190782581	55	0.19904	0.00930653	0.000143251	0.0405727	up				48383	ENSG00000214147	NA	0
7	66506902	66506978	77	0.264914	-0.00601492	0.000144629	0.0409307	down				678	ENSG00000179342	NA	1
5	105413609	105413679	71	0.724343	0.006525	0.000144845	0.040949	up				20638	ENSG00000251574	NA	0
1	3773849	3773971	123	0.811802	-0.00376009	0.000144921	0.040949	down	ENSG00000235169	SMIM1	protein_coding	1023	ENSG00000235169	SMIM1	0
5	110676852	110676919	68	0.879841	0.00560967	0.000145071	0.0409593	up	ENSG00000186952	TMEM232	protein_coding	8007	ENSG00000207177	NA	0
19	7905558	7905582	25	0.78744	-0.00961401	0.000145264	0.0409815	down	ENSG00000076984	MAP2K7	protein_coding	1650	ENSG00000076984	MAP2K7	0
12	113333801	113333989	189	0.736108	-0.00642076	0.000145448	0.0410013	down	ENSG00000089060	SLC8B1	protein_coding	623	ENSG00000089060	SLC8B1	1
13	105354043	105354092	50	0.922973	0.0045892	0.00014564	0.0410236	up				56723	ENSG00000286929	NA	0
1	43391038	43391081	44	0.685527	-0.00802105	0.000145762	0.0410257	down	ENSG00000198198	SZT2	protein_coding	1086	ENSG00000198198	SZT2	0
7	223415	223721	307	0.927786	-0.00217709	0.000146413	0.0411767	down	ENSG00000177706	FAM20C	protein_coding	5835	ENSG00000249852	NA	0
4	128031322	128031322	1	0.485197	0.0147879	0.000146759	0.0412301	up	ENSG00000164074	ABHD18	protein_coding	29963	ENSG00000138709	LARP1B	0
19	56987643	56987665	23	0.387484	0.00969924	0.000146831	0.0412301	up				65624	ENSG00000269786	NA	0
9	111687690	111687739	50	0.6001	-0.0175274	0.000147082	0.041232	down	ENSG00000165181	SHOC1	protein_coding	26084	ENSG00000242616	GNG10	0
20	63659603	63659807	205	0.168481	-0.0042051	0.000147092	0.041232	down	ENSG00000258366;ENSG00000026036	RTEL1;RTEL1-TNFRSF6B	protein_coding;protein_coding	302	ENSG00000026036	RTEL1-TNFRSF6B	1
7	1657071	1657108	38	0.960413	-0.00179833	0.000147181	0.041232	down				8636	ENSG00000225968	ELFN1	0
17	77452561	77452601	41	0.564117	-0.0120903	0.000147411	0.0412337	down	ENSG00000184640	SEPTIN9	protein_coding	1223	ENSG00000184640	SEPTIN9	0
10	15896636	15896636	1	0.812919	0.0102259	0.000147417	0.0412337	up				36128	ENSG00000148481	MINDY3	0
11	67538877	67539007	131	0.921965	0.00420415	0.000147736	0.041291	up	ENSG00000283257	NA	unprocessed_pseudogene	0	ENSG00000283257	NA	1
2	156007163	156007171	9	0.896686	0.00747927	0.000148519	0.0414778	up				17441	ENSG00000226383	LINC01876	0
11	65719458	65719458	1	0.402565	-0.010085	0.000148906	0.0415457	down	ENSG00000172977;ENSG00000172922	KAT5;RNASEH2C	protein_coding;protein_coding	751	ENSG00000172977	KAT5	1
1	6553063	6553080	18	0.0919436	-0.00546806	0.000148993	0.0415457	down	ENSG00000162408	NOL9	protein_coding	1419	ENSG00000162408	NOL9	0
21	20078637	20078809	173	0.581712	0.0111383	0.000149251	0.0415854	up				178593	ENSG00000233480	LINC01683	0
X	1574368	1574479	112	0.796719	0.00645895	0.000149426	0.041602	up				17124	ENSG00000197976	AKAP17A	0
3	96278370	96278577	208	0.835522	0.00716142	0.000149656	0.0416338	up				33034	ENSG00000271671	NA	0
19	7611535	7611908	374	0.215696	-0.00632876	0.000149848	0.041655	down	ENSG00000076826	CAMSAP3	protein_coding	2725	ENSG00000076826	CAMSAP3	0
5	150168117	150168213	97	0.269909	-0.0109051	0.000149965	0.0416554	down	ENSG00000113722	CDX1	protein_coding	1338	ENSG00000113722	CDX1	0
20	31548401	31548411	11	0.884944	-0.00442929	0.000150142	0.0416616	down	ENSG00000101294	HM13	protein_coding	227	ENSG00000101294	HM13	1
4	139233173	139233338	166	0.741441	0.0123468	0.000150218	0.0416616	up	ENSG00000288785	NA	lncRNA	2053	ENSG00000252362	RNU6-506P	0
11	17387943	17388145	203	0.820158	-0.00359326	0.000150554	0.0417187	down	ENSG00000187486	KCNJ11	protein_coding	513	ENSG00000187486	KCNJ11	1
11	69816364	69816588	225	0.396792	-0.00749726	0.000150684	0.0417187	down	ENSG00000186895	FGF3	protein_coding	961	ENSG00000186895	FGF3	1
22	41909102	41909180	79	0.511901	-0.0068864	0.000151163	0.0417187	down				5385	ENSG00000234965	SHISA8	0
6	1392389	1392425	37	0.157776	-0.00532816	0.00015117	0.0417187	down	ENSG00000137273	FOXF2	protein_coding	1977	ENSG00000275859	MIR6720	0
11	71902351	71902356	6	0.265102	0.00610045	0.000151176	0.0417187	up	ENSG00000254469	NA	protein_coding	837	ENSG00000254593	OR7E126P	1
2	25981313	25981555	243	0.429686	-0.00673224	0.000151213	0.0417187	down	ENSG00000084731	KIF3C	protein_coding	690	ENSG00000084731	KIF3C	1
10	92289113	92289137	25	0.416907	-0.0125217	0.000151235	0.0417187	down	ENSG00000107864	CPEB3	protein_coding	1940	ENSG00000107864	CPEB3	0
13	69566831	69566884	54	0.628739	0.00950164	0.000151579	0.0417392	up				158095	ENSG00000224640	SRSF1P1	0
16	86493471	86493596	126	0.237055	-0.00709074	0.000151716	0.0417392	down	ENSG00000268388	FENDRR	lncRNA	2589	ENSG00000268388	FENDRR	0
6	118948319	118948453	135	0.567312	0.00854283	0.00015196	0.0417392	up	ENSG00000253194	NA	lncRNA	13156	ENSG00000111877	MCM9	0
18	45388223	45388358	136	0.874371	0.00329357	0.000152145	0.0417392	up	ENSG00000132874	SLC14A2	protein_coding	46938	ENSG00000267097	SLC14A2-AS1	0
2	112431797	112431936	140	0.191177	-0.00819959	0.000152164	0.0417392	down	ENSG00000169629	RGPD8	protein_coding	1582	ENSG00000169629	RGPD8	0
12	120647033	120647099	67	0.203204	-0.00542755	0.000152181	0.0417392	down	ENSG00000157782	CABP1	protein_coding	2985	ENSG00000157782	CABP1	0
7	140695424	140695519	96	0.164278	-0.00631939	0.000152268	0.0417392	down	ENSG00000133597;ENSG00000090266;ENSG00000240889	ADCK2;NDUFB2;NDUFB2-AS1	protein_coding;protein_coding;lncRNA	1151	ENSG00000090266	NDUFB2	0
19	50984488	50984593	106	0.0288429	-0.00160553	0.000152343	0.0417392	down	ENSG00000267879	NA	lncRNA	388	ENSG00000169035	KLK7	1
19	2578117	2578140	24	0.285807	-0.0116111	0.000152352	0.0417392	down	ENSG00000176533	GNG7	protein_coding	17150	ENSG00000263974	RN7SL121P	0
10	93064387	93064464	78	0.540803	-0.00789035	0.000152887	0.0418009	down	ENSG00000187553;ENSG00000285846	CYP26C1;NA	protein_coding;lncRNA	740	ENSG00000285846	NA	1
16	2430551	2430615	65	0.0321125	-0.00255114	0.000152971	0.0418009	down	ENSG00000162063	CCNF	protein_coding	1101	ENSG00000162063	CCNF	0
11	727453	727550	98	0.839883	-0.00434066	0.000153048	0.0418009	down	ENSG00000177106	EPS8L2	protein_coding	405	ENSG00000269915	NA	1
8	142404617	142404791	175	0.475521	-0.00559878	0.000153089	0.0418009	down	ENSG00000261693	NA	lncRNA	964	ENSG00000261693	NA	1
20	37914003	37914069	67	0.590579	-0.00930182	0.000153157	0.0418009	down	ENSG00000132821	VSTM2L	protein_coding	10860	ENSG00000132821	VSTM2L	0
10	95695047	95695057	11	0.0149839	-0.00187257	0.000153313	0.0418118	down				903	ENSG00000119977	TCTN3	1
8	81152175	81152311	137	0.801123	0.00624841	0.000153689	0.0418665	up	ENSG00000253214	NA	lncRNA	1930	ENSG00000253214	NA	0
2	126677639	126677702	64	0.868853	-0.00552644	0.000153746	0.0418665	down	ENSG00000136732	GYPC	protein_coding	1919	ENSG00000235128	NA	0
2	140722765	140722968	204	0.723287	0.00822584	0.000153959	0.041878	up	ENSG00000168702	LRP1B	protein_coding	38876	ENSG00000236440	COPRSP1	0
1	204518104	204518143	40	0.17754	-0.00810543	0.000154021	0.041878	down	ENSG00000198625	MDM4	protein_coding	1631	ENSG00000198625	MDM4	0
18	69527884	69528020	137	0.882275	0.00270723	0.000155679	0.0422968	up	ENSG00000206052;ENSG00000265643	DOK6;NA	protein_coding;lncRNA	57952	ENSG00000264845	NA	0
5	94920716	94920737	22	0.523552	0.0210971	0.000155988	0.0423193	up	ENSG00000175471	MCTP1	protein_coding	8963	ENSG00000175471	MCTP1	0
2	86602685	86602820	136	0.829927	0.00463897	0.000156195	0.0423193	up	ENSG00000249884;ENSG00000228363	RNF103-CHMP3;NA	protein_coding;lncRNA	1186	ENSG00000228363	NA	0
6	18737481	18737646	166	0.91817	0.00311868	0.000156215	0.0423193	up				165696	ENSG00000207775	MIR548A1	0
19	8124061	8124122	62	0.96661	-0.00144006	0.000156231	0.0423193	down	ENSG00000142449	FBN3	protein_coding	12254	ENSG00000142449	FBN3	0
1	6182730	6182790	61	0.893534	-0.00518209	0.00015712	0.0425113	down	ENSG00000285629	NA	protein_coding	2408	ENSG00000116254	CHD5	0
7	101238415	101238622	208	0.946113	-0.00184794	0.000157202	0.0425113	down	ENSG00000106404	CLDN15	protein_coding	197	ENSG00000106404	CLDN15	1
17	59275093	59275138	46	0.362638	-0.0111448	0.000157294	0.0425113	down	ENSG00000153982	GDPD1	protein_coding	5991	ENSG00000271063	SNRPGP17	0
19	2060399	2060539	141	0.139703	-0.00267725	0.000157467	0.0425151	down				9154	ENSG00000099875	MKNK2	0
6	52506613	52506662	50	0.736722	-0.00599111	0.000157822	0.0425151	down	ENSG00000096093;ENSG00000065308	EFHC1;TRAM2	protein_coding;protein_coding	16326	ENSG00000096093	EFHC1	0
2	96499434	96499535	102	0.847921	-0.00531236	0.000158111	0.0425151	down	ENSG00000163121	NEURL3	protein_coding	5809	ENSG00000163121	NEURL3	0
7	84213223	84213273	51	0.963346	-0.00210033	0.000158161	0.0425151	down	ENSG00000075213	SEMA3A	protein_coding	17777	ENSG00000075213	SEMA3A	0
6	27629114	27629247	134	0.830742	-0.00448805	0.000158388	0.0425151	down				23577	ENSG00000216676	RPL8P1	0
8	142509511	142509760	250	0.654655	-0.00536706	0.000158482	0.0425151	down	ENSG00000181790	ADGRB1	protein_coding	30390	ENSG00000181790	ADGRB1	0
10	1068203	1068338	136	0.76548	0.00934707	0.00015855	0.0425151	up	ENSG00000047056	WDR37	protein_coding	6044	ENSG00000047056	WDR37	0
12	81650210	81650261	52	0.667186	0.0113102	0.000158559	0.0425151	up	ENSG00000139220	PPFIA2	protein_coding	26585	ENSG00000139220	PPFIA2	0
10	132065092	132065299	208	0.175075	-0.00627226	0.000158586	0.0425151	down	ENSG00000188385	JAKMIP3	protein_coding	28	ENSG00000188385	JAKMIP3	1
6	169641082	169641125	44	0.106738	-0.00702075	0.000158604	0.0425151	down	ENSG00000285733;ENSG00000184465	NA;WDR27	protein_coding;protein_coding	8107	ENSG00000184465	WDR27	0
2	11745999	11746125	127	0.095146	-0.00289591	0.000158704	0.0425151	down	ENSG00000134324	LPIN1	protein_coding	462	ENSG00000134324	LPIN1	1
2	173167073	173167206	134	0.618403	0.0102821	0.000158959	0.0425151	up	ENSG00000091436;ENSG00000238133	MAP3K20;MAP3K20-AS1	protein_coding;lncRNA	7062	ENSG00000091436	MAP3K20	0
19	2276746	2276969	224	0.401484	-0.0073794	0.000159033	0.0425151	down	ENSG00000273734;ENSG00000188305	NA;PEAK3	protein_coding;protein_coding	4221	ENSG00000104904	OAZ1	0
3	194146525	194146525	1	0.97178	-0.00359859	0.000159038	0.0425151	down				850	ENSG00000242201	RN7SL215P	1
9	124477130	124477289	160	0.171558	-0.00552953	0.000159161	0.0425151	down	ENSG00000180264	ADGRD2	protein_coding	8571	ENSG00000180264	ADGRD2	0
7	102432598	102432706	109	0.221065	-0.00526918	0.000159338	0.0425151	down	ENSG00000239480	NA	lncRNA	399	ENSG00000160991	ORAI2	1
11	67631702	67631807	106	0.612099	-0.00629457	0.000159415	0.0425151	down	ENSG00000167800	TBX10	protein_coding	1764	ENSG00000167799	NUDT8	0
13	26159346	26159482	137	0.774447	0.00685017	0.000159432	0.0425151	up	ENSG00000127870	RNF6	protein_coding	5170	ENSG00000233963	ATP8A2P3	0
6	137312452	137312587	136	0.85099	0.00321361	0.000159803	0.0425825	up				93002	ENSG00000027697	IFNGR1	0
19	18595120	18595337	218	0.258008	-0.00934722	0.000160061	0.0426197	down	ENSG00000006016	CRLF1	protein_coding	684	ENSG00000006016	CRLF1	1
20	35955812	35956016	205	0.29183	-0.00662191	0.000160194	0.0426236	down	ENSG00000171222;ENSG00000149646	SCAND1;CNBD2	protein_coding;protein_coding	452	ENSG00000171222	SCAND1	1
8	25518697	25518793	97	0.841037	0.00538549	0.000160418	0.0426516	up				9917	ENSG00000289357	NA	0
11	65613767	65614124	358	0.237055	-0.00437221	0.0001608	0.0427217	down	ENSG00000173327	MAP3K11	protein_coding	96	ENSG00000173327	MAP3K11	1
2	43881579	43881634	56	0.910272	0.00426795	0.000161061	0.0427434	up	ENSG00000143921	ABCG8	protein_coding	10711	ENSG00000138095	LRPPRC	0
12	123460074	123460127	54	0.631196	-0.0121801	0.000161224	0.0427434	down	ENSG00000184209	SNRNP35	protein_coding	550	ENSG00000184209	SNRNP35	1
22	26168517	26168534	18	0.0817298	-0.00476964	0.000161238	0.0427434	down	ENSG00000229770	NA	lncRNA	218	ENSG00000229770	NA	1
12	57001539	57001677	139	0.649993	-0.00475762	0.000161611	0.0427753	down	ENSG00000166860	ZBTB39	protein_coding	4577	ENSG00000166856	GPR182	0
9	128704774	128704866	93	0.901479	-0.0044387	0.000161836	0.0427753	down	ENSG00000160447	PKN3	protein_coding	2270	ENSG00000160447	PKN3	0
4	97722841	97722891	51	0.101808	0.0038638	0.000161935	0.0427753	up	ENSG00000163116	STPG2	protein_coding	89017	ENSG00000254044	NA	0
7	63573100	63573325	226	0.48354	-0.0114554	0.00016194	0.0427753	down	ENSG00000223566	TNRC18P2	unprocessed_pseudogene	11749	ENSG00000223566	TNRC18P2	0
19	18452992	18453199	208	0.923024	-0.00345917	0.000161999	0.0427753	down	ENSG00000105656	ELL	protein_coding	2465	ENSG00000105656	ELL	0
6	122825743	122825934	192	0.735968	0.00956811	0.000162118	0.0427753	up				34053	ENSG00000232362	ATP5MGP2	0
11	73351351	73351390	40	0.529427	-0.00983877	0.000162189	0.0427753	down	ENSG00000110237	ARHGEF17	protein_coding	5086	ENSG00000110237	ARHGEF17	0
17	1396952	1397195	244	0.370966	-0.0085793	0.000162339	0.0427811	down	ENSG00000108953	YWHAE	protein_coding	2393	ENSG00000108953	YWHAE	0
3	129306358	129306363	6	0.223951	-0.00798515	0.000162449	0.0427811	down				9028	ENSG00000206417	H1-10-AS1	0
10	5840099	5840614	516	0.0588498	-0.00195646	0.000162604	0.0427906	down	ENSG00000057608	GDI2	protein_coding	1517	ENSG00000057608	GDI2	0
19	41327477	41327607	131	0.680208	-0.00536046	0.000162724	0.0427909	down	ENSG00000105329	TGFB1	protein_coding	7743	ENSG00000142039	CCDC97	0
14	99118985	99118985	1	0.749961	-0.0105284	0.000162865	0.0427969	down				39430	ENSG00000229402	NA	0
16	64753269	64753269	1	0.53338	0.0142018	0.000163537	0.0428657	up				14945	ENSG00000260068	NA	0
1	9233297	9233324	28	0.690891	-0.0100346	0.00016368	0.0428657	down				1449	ENSG00000049239	H6PD	0
9	135959268	135959293	26	0.534569	-0.0148532	0.000163701	0.0428657	down	ENSG00000130560	UBAC1	protein_coding	1918	ENSG00000130560	UBAC1	0
8	87128943	87128995	53	0.715212	0.0119469	0.000163716	0.0428657	up	ENSG00000176571	CNBD1	protein_coding	76998	ENSG00000176571	CNBD1	0
10	43265760	43265822	63	0.156348	-0.00740655	0.000163722	0.0428657	down	ENSG00000198915	RASGEF1A	protein_coding	1242	ENSG00000198915	RASGEF1A	0
8	135455633	135455757	125	0.873912	-0.00362123	0.000163888	0.0428721	down				1194	ENSG00000254372	NA	0
3	49337769	49337829	61	0.668113	-0.0113567	0.000163984	0.0428721	down	ENSG00000114316	USP4	protein_coding	2199	ENSG00000114316	USP4	0
9	135703771	135703961	191	0.899103	-0.00235463	0.000164374	0.042904	down	ENSG00000165643;ENSG00000107147	SOHLH1;KCNT1	protein_coding;protein_coding	536	ENSG00000165643	SOHLH1	1
12	111914719	111914784	66	0.804269	0.00723323	0.000164541	0.042904	up				12233	ENSG00000226469	ADAM1B	0
15	74783627	74783699	73	0.448156	-0.00800975	0.000164574	0.042904	down	ENSG00000103653	CSK	protein_coding	1021	ENSG00000103653	CSK	0
1	6552904	6552957	54	0.373445	-0.00795999	0.000164706	0.042904	down	ENSG00000162408	NOL9	protein_coding	1542	ENSG00000162408	NOL9	0
20	62124219	62124255	37	0.0879132	-0.00453301	0.000164795	0.042904	down	ENSG00000149657	LSM14B	protein_coding	1066	ENSG00000149657	LSM14B	0
17	45142716	45142922	207	0.875634	-0.00283146	0.000164821	0.042904	down	ENSG00000181513	ACBD4	protein_coding	5547	ENSG00000276728	NA	0
5	150625764	150625792	29	0.206666	-0.0090525	0.000165084	0.042928	down	ENSG00000171992;ENSG00000286657	SYNPO;NA	protein_coding;lncRNA	986	ENSG00000286657	NA	1
16	30776647	30776735	89	0.435276	-0.00928451	0.000165151	0.042928	down				613	ENSG00000280211	NA	1
15	58943245	58943485	241	0.871303	0.00393645	0.000165657	0.0430002	up	ENSG00000157450	RNF111	protein_coding	9565	ENSG00000137776	SLTM	0
11	68122802	68123117	316	0.165463	-0.00409064	0.000165668	0.0430002	down	ENSG00000255236	CHKA-DT	lncRNA	748	ENSG00000255236	CHKA-DT	1
19	2426325	2426335	11	0.0375676	-0.00371406	0.000165921	0.043035	down	ENSG00000099800	TIMM13	protein_coding	1202	ENSG00000099800	TIMM13	0
9	89321388	89321524	137	0.864549	-0.00429404	0.000166168	0.0430495	down	ENSG00000187742	SECISBP2	protein_coding	675	ENSG00000187742	SECISBP2	1
X	49924172	49924297	126	0.102002	-0.00523875	0.000166216	0.0430495	down	ENSG00000171365	CLCN5	protein_coding	767	ENSG00000171365	CLCN5	1
1	11261038	11261397	360	0.0409716	-0.00167191	0.000166549	0.0430906	down	ENSG00000198793	MTOR	protein_coding	1153	ENSG00000198793	MTOR	0
19	49514786	49514854	69	0.475059	-0.0117761	0.000166769	0.0430906	down	ENSG00000104870	FCGRT	protein_coding	727	ENSG00000104870	FCGRT	1
5	94743798	94743935	138	0.451349	0.00795584	0.000166803	0.0430906	up	ENSG00000175471	MCTP1	protein_coding	33104	ENSG00000175471	MCTP1	0
6	36364375	36364397	23	0.0503869	-0.00393015	0.000167211	0.0430906	down	ENSG00000010030	ETV7	protein_coding	22433	ENSG00000224666	ETV7-AS1	0
15	88622779	88622788	10	0.199311	-0.00962737	0.000167275	0.0430906	down	ENSG00000181026	AEN	protein_coding	1397	ENSG00000181026	AEN	0
5	22459822	22459942	121	0.890359	0.00553145	0.000167296	0.0430906	up	ENSG00000154162	CDH12	protein_coding	120876	ENSG00000249206	GCNT1P2	0
9	66263755	66263822	68	0.0479758	-0.00279677	0.000167305	0.0430906	down				9290	ENSG00000233765	CDRT15P12	0
1	27567270	27567500	231	0.913579	-0.00193278	0.000167332	0.0430906	down	ENSG00000126705	AHDC1	protein_coding	759	ENSG00000126705	AHDC1	1
4	139294179	139294265	87	0.0730711	-0.00407621	0.000167666	0.0431458	down	ENSG00000109390	NDUFC1	protein_coding	1549	ENSG00000109390	NDUFC1	0
1	108703513	108703551	39	0.691504	0.00738282	0.000167817	0.0431539	up				5812	ENSG00000134186	PRPF38B	0
19	46991297	46991429	133	0.77015	-0.00562396	0.000168099	0.0431957	down	ENSG00000160007	ARHGAP35	protein_coding	1712	ENSG00000160007	ARHGAP35	0
15	20184930	20184976	47	0.669039	0.0113021	0.000169101	0.0434221	up				31153	ENSG00000258780	BMS1P15	0
19	12756999	12757197	199	0.435652	-0.00559859	0.000169333	0.0434506	down	ENSG00000039987	BEST2	protein_coding	1139	ENSG00000039987	BEST2	0
20	37904204	37904499	296	0.783014	-0.00369264	0.000169502	0.043463	down	ENSG00000132821	VSTM2L	protein_coding	1061	ENSG00000132821	VSTM2L	0
9	135959414	135959532	119	0.279841	-0.0101825	0.000170459	0.0436773	down	ENSG00000130560	UBAC1	protein_coding	1679	ENSG00000130560	UBAC1	0
16	75662959	75663100	142	0.62865	0.010155	0.000171563	0.0438686	up	ENSG00000166848;ENSG00000284484	TERF2IP;NA	protein_coding;protein_coding	6726	ENSG00000166848	TERF2IP	0
19	3571820	3571881	62	0.147521	-0.00370766	0.000171634	0.0438686	down	ENSG00000161091	MFSD12	protein_coding	895	ENSG00000064961	HMG20B	1
2	96146414	96146529	116	0.0846707	-0.00459212	0.000171637	0.0438686	down	ENSG00000228873	NA	lncRNA	482	ENSG00000228873	NA	1
9	28666052	28666188	137	0.946137	0.00194696	0.000171692	0.0438686	up	ENSG00000174482	LINGO2	protein_coding	4096	ENSG00000174482	LINGO2	0
10	45358933	45359054	122	0.919595	0.00320656	0.00017193	0.0438982	up				15121	ENSG00000012779	ALOX5	0
7	130677053	130677172	120	0.939578	-0.00280078	0.00017218	0.0439308	down	ENSG00000213265	TSGA13	protein_coding	8200	ENSG00000287547	NA	0
Y	8241880	8242053	174	0.0368401	-0.00182573	0.000172341	0.0439408	down				35134	ENSG00000225809	RBMY2KP	0
18	26372688	26372827	140	0.714082	0.00803149	0.000172536	0.0439595	up	ENSG00000141384	TAF4B	protein_coding	6281	ENSG00000207160	RNU6-1289P	0
6	1617629	1617693	65	0.472639	-0.0108402	0.000172909	0.0440088	down				7046	ENSG00000112699	GMDS	0
5	26877122	26877160	39	0.480327	0.0110236	0.000172974	0.0440088	up				13672	ENSG00000113100	CDH9	0
16	3030957	3031149	193	0.926124	-0.00181923	0.000173225	0.0440415	down	ENSG00000162069	BICDL2	protein_coding	824	ENSG00000162069	BICDL2	1
X	150772186	150772414	229	0.809503	-0.0041576	0.000173616	0.0441099	down	ENSG00000102181	CD99L2	protein_coding	36786	ENSG00000063601	MTMR1	0
17	81984385	81984502	118	0.779121	-0.00457708	0.000174418	0.0442823	down	ENSG00000169696	ASPSCR1	protein_coding	6198	ENSG00000169696	ASPSCR1	0
5	55833665	55833802	138	0.881626	0.00368604	0.000174699	0.0442866	up				6222	ENSG00000248854	HNRNPH1P3	0
7	73307624	73307721	98	0.401546	-0.00975738	0.00017477	0.0442866	down	ENSG00000130305	NSUN5	protein_coding	831	ENSG00000130305	NSUN5	1
8	143540418	143540525	108	0.0485647	-0.00254294	0.000174904	0.0442866	down	ENSG00000014164	ZC3H3	protein_coding	921	ENSG00000014164	ZC3H3	1
18	720302	720362	61	0.54554	0.0121378	0.000175034	0.0442866	up				7639	ENSG00000132199	ENOSF1	0
12	740379	740551	173	0.949546	0.00150167	0.000175049	0.0442866	up				12027	ENSG00000060237	WNK1	0
16	89656167	89656429	263	0.173609	-0.00578072	0.000175275	0.0443127	down	ENSG00000131165	CHMP1A	protein_coding	1177	ENSG00000131165	CHMP1A	0
2	22165444	22165509	66	0.0775802	-0.00292859	0.000175576	0.0443575	down	ENSG00000228999	NA	lncRNA	22826	ENSG00000223691	NA	0
18	67526705	67526841	137	0.775252	0.00890256	0.000175736	0.0443668	up	ENSG00000265533	DSEL-AS1	lncRNA	9984	ENSG00000171451	DSEL	0
7	30770001	30770055	55	0.768049	-0.00749785	0.000176163	0.0444319	down	ENSG00000254959	INMT-MINDY4	protein_coding	1361	ENSG00000106125	MINDY4	0
18	52201684	52201730	47	0.377934	0.0109746	0.000176285	0.0444319	up				21347	ENSG00000286283	NA	0
9	34627672	34627828	157	0.816096	-0.00505652	0.000176363	0.0444319	down	ENSG00000205143	ARID3C	protein_coding	257	ENSG00000205143	ARID3C	1
18	32922470	32922637	168	0.937332	0.00401356	0.000176607	0.0444434	up	ENSG00000263765	NA	lncRNA	31437	ENSG00000263450	NA	0
7	101692102	101692156	55	0.638122	-0.00709304	0.000176656	0.0444434	down				62805	ENSG00000106436	MYL10	0
16	89949897	89950070	174	0.469467	-0.01157	0.000176998	0.0444983	down	ENSG00000140995	DEF8	protein_coding	1093	ENSG00000140995	DEF8	0
17	22301785	22301901	117	0.182011	-0.00669817	0.000177177	0.0445123	down				2409	ENSG00000178130	FAM27E5	0
12	131827200	131827296	97	0.36547	-0.00795912	0.000177608	0.0445825	down				1096	ENSG00000198598	MMP17	0
7	149789620	149789713	94	0.761329	-0.00489554	0.000177704	0.0445825	down	ENSG00000197558	SSPOP	transcribed_unitary_pseudogene	3399	ENSG00000197558	SSPOP	0
1	32276934	32276994	61	0.282022	-0.00978237	0.000178436	0.0446425	down	ENSG00000182866	LCK	protein_coding	1313	ENSG00000182866	LCK	0
3	46898033	46898048	16	0.755461	-0.00713448	0.000178502	0.0446425	down	ENSG00000160801	PTH1R	protein_coding	4550	ENSG00000160801	PTH1R	0
22	17640755	17640779	25	0.3464	-0.0080961	0.000178604	0.0446425	down	ENSG00000099968	BCL2L13	protein_coding	1943	ENSG00000099968	BCL2L13	0
12	26332503	26332525	23	0.975677	0.00137131	0.00017869	0.0446425	up	ENSG00000256234;ENSG00000255968	NA;NA	lncRNA;lncRNA	3330	ENSG00000256234	NA	0
1	36339020	36339070	51	0.872132	-0.00408469	0.000178731	0.0446425	down				9389	ENSG00000286379	NA	0
5	2168960	2169058	99	0.430879	-0.00633156	0.000178835	0.0446425	down				15651	ENSG00000201026	Y_RNA	0
5	131713276	131713276	1	0.928816	0.00562301	0.000178893	0.0446425	up	ENSG00000273217;ENSG00000217128	NA;FNIP1	protein_coding;protein_coding	53160	ENSG00000286676	ACTBP4	0
7	146328039	146328141	103	0.890502	0.00502837	0.000178934	0.0446425	up	ENSG00000174469	CNTNAP2	protein_coding	16318	ENSG00000274118	Y_RNA	0
17	14046785	14046835	51	0.810969	0.0101099	0.000179411	0.0447008	up	ENSG00000236088	COX10-AS1	lncRNA	16127	ENSG00000236088	COX10-AS1	0
2	584078	584145	68	0.174724	-0.00764469	0.000179416	0.0447008	down				24949	ENSG00000233633	NA	0
2	231585032	231585041	10	0.968297	0.00246358	0.000179839	0.0447751	up				822	ENSG00000228884	RPL23AP26	1
7	130142882	130142938	57	0.688923	-0.0102543	0.000180445	0.0448949	down				1143	ENSG00000229196	NA	0
1	226067602	226067667	66	0.784863	-0.00862345	0.000180849	0.0449644	down	ENSG00000163041	H3-3A	protein_coding	3624	ENSG00000163041	H3-3A	0
1	119002380	119002438	59	0.203199	-0.00863439	0.000181271	0.0449989	down				974	ENSG00000239216	NA	1
2	74419053	74419106	54	0.792616	-0.00756808	0.000181299	0.0449989	down	ENSG00000159239;ENSG00000284308	NA;C2orf81	protein_coding;protein_coding	510	ENSG00000284308	C2orf81	1
4	118882862	118882924	63	0.780819	0.0105805	0.000181362	0.0449989	up	ENSG00000172403	SYNPO2	protein_coding	5916	ENSG00000172403	SYNPO2	0
2	1558507	1558562	56	0.24074	-0.00713687	0.000181569	0.0450192	down	ENSG00000231482;ENSG00000228613	NA;NA	lncRNA;lncRNA	6061	ENSG00000283766	NA	0
17	9736154	9736330	177	0.943878	0.00182586	0.000182228	0.0451515	up				27855	ENSG00000282882	NA	0
5	164789257	164789461	205	0.906293	0.00399191	0.000182399	0.0451629	up	ENSG00000241956	NA	lncRNA	145806	ENSG00000206845	RNU6-209P	0
12	53160045	53160113	69	0.864083	-0.00679516	0.000182545	0.0451681	down	ENSG00000139631;ENSG00000257808	CSAD;NA	protein_coding;lncRNA	458	ENSG00000257808	NA	1
20	33792227	33792273	47	0.792746	-0.00446426	0.000183298	0.0453232	down	ENSG00000131061;ENSG00000230753	ZNF341;ZNF341-AS1	protein_coding;lncRNA	753	ENSG00000230753	ZNF341-AS1	1
17	82645844	82645978	135	0.238781	-0.00707404	0.000183501	0.0453423	down	ENSG00000141580	WDR45B	protein_coding	2339	ENSG00000141580	WDR45B	0
16	737647	737982	336	0.87001	-0.00293698	0.000183835	0.0453621	down	ENSG00000103245	CIAO3	protein_coding	0	ENSG00000103245	CIAO3	1
18	50654749	50654835	87	0.859991	-0.00370153	0.000183926	0.0453621	down	ENSG00000141639	MAPK4	protein_coding	3536	ENSG00000287381	NA	0
20	33662407	33662468	62	0.248776	-0.00584879	0.000183959	0.0453621	down	ENSG00000125967;ENSG00000149609	NECAB3;C20orf144	protein_coding;protein_coding	0	ENSG00000125967	NECAB3	1
22	32351522	32351559	38	0.522942	-0.0111354	0.000184738	0.0455159	down				3325	ENSG00000128276	RFPL3	0
8	105443032	105443093	62	0.856325	0.00617512	0.000184864	0.0455159	up	ENSG00000169946	ZFPM2	protein_coding	23887	ENSG00000169946	ZFPM2	0
2	11682434	11682539	106	0.144629	-0.00556329	0.000184962	0.0455159	down	ENSG00000134324;ENSG00000228496	LPIN1;NA	protein_coding;lncRNA	972	ENSG00000228496	NA	1
6	11095484	11095648	165	0.443766	-0.0082393	0.000185248	0.0455269	down	ENSG00000224531	SMIM13	protein_coding	1252	ENSG00000224531	SMIM13	0
5	119832534	119832632	99	0.300389	0.0108004	0.000185355	0.0455269	up				152336	ENSG00000234259	NA	0
15	26864774	26864804	31	0.681129	-0.0076523	0.000185385	0.0455269	down	ENSG00000166206	GABRB3	protein_coding	2106	ENSG00000186297	GABRA5	0
19	13839174	13839279	106	0.898401	-0.00224485	0.000186144	0.045623	down	ENSG00000267519	MIR23AHG	lncRNA	2514	ENSG00000207980	MIR23A	0
2	210000855	210000989	135	0.507723	-0.0104448	0.000186269	0.045623	down				1575	ENSG00000197713	RPE	0
2	61761940	61761994	55	0.525513	0.0135244	0.000186305	0.045623	up	ENSG00000289410	NA	lncRNA	2206	ENSG00000289410	NA	0
2	171418044	171418239	196	0.864141	0.00427602	0.000186377	0.045623	up	ENSG00000123600	METTL8	protein_coding	14876	ENSG00000123600	METTL8	0
6	32048323	32048481	159	0.819944	-0.00360689	0.00018641	0.045623	down	ENSG00000168477	TNXB	protein_coding	1715	ENSG00000168477	TNXB	0
16	73578005	73578153	149	0.848793	0.00785617	0.000187185	0.0457814	up	ENSG00000140836	ZFHX3	protein_coding	34063	ENSG00000260848	NA	0
2	91746652	91746785	134	0.876869	-0.00387462	0.00018768	0.0458524	down	ENSG00000223703	NA	unprocessed_pseudogene	2200	ENSG00000232531	KMT5AP2	0
7	150877	150928	52	0.0328013	-0.00266066	0.000187843	0.0458524	down	ENSG00000240859	NA	lncRNA	1098	ENSG00000240859	NA	0
19	11294448	11294567	120	0.183391	-0.00579472	0.000187856	0.0458524	down				1571	ENSG00000130167	TSPAN16	0
16	75530308	75530369	62	0.222657	-0.00529557	0.000188563	0.0459936	down	ENSG00000135702;ENSG00000260092	CHST5;NA	protein_coding;protein_coding	4877	ENSG00000135702	CHST5	0
7	142781842	142781863	22	0.571734	-0.0105634	0.000188853	0.0460333	down				2304	ENSG00000243661	WBP1LP1	0
3	3543542	3543580	39	0.161007	-0.00598775	0.000189067	0.0460542	down	ENSG00000223727	NA	lncRNA	59426	ENSG00000223727	NA	0
14	92515322	92515380	59	0.1786	-0.00560272	0.000189358	0.046094	down	ENSG00000100599	RIN3	protein_coding	1517	ENSG00000100599	RIN3	0
6	41684610	41684809	200	0.813461	-0.00476704	0.000189607	0.046096	down	ENSG00000112561	TFEB	protein_coding	1687	ENSG00000112561	TFEB	0
17	8381790	8381854	65	0.594154	-0.0130418	0.000189625	0.046096	down	ENSG00000263809;ENSG00000161970	NA;RPL26	protein_coding;protein_coding	454	ENSG00000161970	RPL26	1
7	27049394	27049462	69	0.854167	0.00668716	0.000189849	0.046096	up				1224	ENSG00000213786	NHP2P2	0
20	63359637	63359858	222	0.510741	-0.00751782	0.000190001	0.046096	down	ENSG00000101204	CHRNA4	protein_coding	0	ENSG00000101204	CHRNA4	1
17	47695957	47696194	238	0.0409306	-0.0019865	0.000190006	0.046096	down	ENSG00000198933	TBKBP1	protein_coding	271	ENSG00000198933	TBKBP1	1
14	34551847	34551877	31	0.656681	-0.0077088	0.000190334	0.0461445	down				4511	ENSG00000206588	RNU1-28P	0
1	20367865	20367899	35	0.165808	-0.0052305	0.000190761	0.0462168	down	ENSG00000236963	LINC01141	lncRNA	34946	ENSG00000158816	VWA5B1	0
7	98619630	98619800	171	0.414407	-0.0101757	0.000191548	0.0463174	down	ENSG00000106236	NPTX2	protein_coding	0	ENSG00000106236	NPTX2	1
7	84616897	84616962	66	0.861211	0.00729856	0.000191635	0.0463174	up				67690	ENSG00000235139	NA	0
9	136326494	136326639	146	0.861098	-0.00327495	0.000191642	0.0463174	down	ENSG00000262075	DKFZP434A062	lncRNA	683	ENSG00000262075	DKFZP434A062	1
16	10964185	10964236	52	0.933609	-0.00369386	0.000191781	0.0463174	down	ENSG00000038532	CLEC16A	protein_coding	8244	ENSG00000038532	CLEC16A	0
12	124912927	124913013	87	0.357705	-0.0100969	0.000191973	0.0463174	down	ENSG00000150991	UBC	protein_coding	1051	ENSG00000150991	UBC	0
4	56975800	56975972	173	0.081419	-0.0031428	0.000192224	0.0463174	down	ENSG00000084092	NOA1	protein_coding	1633	ENSG00000084092	NOA1	0
2	11124520	11124670	151	0.874935	-0.00363773	0.00019224	0.0463174	down	ENSG00000145063	NA	lncRNA	7417	ENSG00000145063	NA	0
5	147351471	147351471	1	0.97043	-0.0029115	0.00019244	0.0463174	down	ENSG00000169302	STK32A	protein_coding	8997	ENSG00000169302	STK32A	0
10	69450365	69450562	198	0.181683	-0.00536283	0.000192452	0.0463174	down				902	ENSG00000099282	TSPAN15	1
12	111407305	111407376	72	0.551776	-0.00665643	0.000192462	0.0463174	down	ENSG00000111252	SH2B3	protein_coding	1381	ENSG00000111252	SH2B3	0
6	69862003	69862003	1	0.9641	-0.0043078	0.000193175	0.046458	down	ENSG00000168216	LMBRD1	protein_coding	4552	ENSG00000082293	COL19A1	0
1	62181763	62181811	49	0.914897	-0.00345612	0.000193316	0.046461	down				7319	ENSG00000234204	PIGPP2	0
18	28960582	28960716	135	0.685025	0.00869918	0.000193647	0.0464998	up				87903	ENSG00000251719	RNU6-408P	0
6	33326411	33326472	62	0.745875	-0.00702671	0.000193736	0.0464998	down	ENSG00000285064;ENSG00000286920	NA;SMIM40	protein_coding;protein_coding	2806	ENSG00000286920	SMIM40	0
2	26186716	26186962	247	0.895468	-0.00211653	0.000194264	0.0465817	down	ENSG00000157833	GAREM2	protein_coding	1483	ENSG00000157833	GAREM2	0
13	68216821	68216885	65	0.754329	0.00945961	0.000194335	0.0465817	up				74394	ENSG00000234765	ELL2P3	0
7	149242145	149242171	27	0.663034	-0.010535	0.000194529	0.046597	down	ENSG00000170260	ZNF212	protein_coding	2450	ENSG00000170260	ZNF212	0
5	20326640	20326818	179	0.953817	0.00234166	0.000194907	0.0466567	up	ENSG00000145526;ENSG00000249854	CDH18;CDH18-AS1	protein_coding;lncRNA	20917	ENSG00000249854	CDH18-AS1	0
19	2960378	2960724	347	0.282101	-0.00769187	0.000195407	0.0467453	down				9719	ENSG00000288906	NA	0
5	1382082	1382176	95	0.466816	-0.00801379	0.00019619	0.0469014	down				1974	ENSG00000250584	LINC01511	0
5	177582012	177582146	135	0.762092	0.00601269	0.000196953	0.0470525	up				10056	ENSG00000184840	TMED9	0
7	710417	710500	84	0.70529	-0.00595927	0.000198427	0.0473612	down	ENSG00000188191	PRKAR1B	protein_coding	2071	ENSG00000188191	PRKAR1B	0
19	40420192	40420330	139	0.570371	-0.00480223	0.000198508	0.0473612	down				5398	ENSG00000105227	PRX	0
14	26451615	26451659	45	0.864943	0.00606784	0.000198768	0.047392	up	ENSG00000139910	NOVA1	protein_coding	142857	ENSG00000262119	NA	0
6	72412944	72412956	13	0.878979	0.00743141	0.000198939	0.0474014	up				46213	ENSG00000079841	RIMS1	0
9	124444559	124444565	7	0.976446	-0.00238373	0.000199172	0.0474168	down				6859	ENSG00000180264	ADGRD2	0
17	6069588	6069617	30	0.0781972	-0.00294508	0.000199267	0.0474168	down	ENSG00000285471;ENSG00000179314	NA;WSCD1	protein_coding;protein_coding	470	ENSG00000179314	WSCD1	1
19	38846635	38846951	317	0.939776	-0.00194053	0.000199593	0.0474628	down	ENSG00000104824	HNRNPL	protein_coding	482	ENSG00000104824	HNRNPL	1
11	67978845	67978950	106	0.593015	0.00684538	0.000199874	0.0474985	up				3601	ENSG00000255554	OR7E1P	0
1	156340319	156340361	43	0.800024	-0.0058985	0.000200352	0.0475807	down	ENSG00000163468;ENSG00000163467	CCT3;TSACC	protein_coding;protein_coding	1416	ENSG00000163467	TSACC	0
2	218658261	218658316	56	0.269519	-0.00791415	0.000200624	0.0476138	down	ENSG00000115568	ZNF142	protein_coding	447	ENSG00000074582	BCS1L	1
9	127877332	127877553	222	0.0211416	-0.000944844	0.000201337	0.0477516	down	ENSG00000106992;ENSG00000257524	AK1;NA	protein_coding;protein_coding	117	ENSG00000106992	AK1	1
20	57433034	57433171	138	0.775619	-0.00425542	0.000201552	0.0477712	down				9570	ENSG00000286052	NA	0
1	2641402	2641587	186	0.838211	-0.00477687	0.000201749	0.0477864	down	ENSG00000215912	TTC34	protein_coding	8385	ENSG00000142606	MMEL1	0
3	9183853	9183954	102	0.872866	-0.00365738	0.000202836	0.0480122	down	ENSG00000196220	SRGAP3	protein_coding	8538	ENSG00000228723	SRGAP3-AS2	0
2	34382863	34382923	61	0.837163	0.00910316	0.000203185	0.0480368	up	ENSG00000228262	LINC01320	lncRNA	864	ENSG00000228262	LINC01320	1
11	65916738	65916843	106	0.722672	-0.00857122	0.000203206	0.0480368	down	ENSG00000175573	C11orf68	protein_coding	1516	ENSG00000175573	C11orf68	0
22	50627152	50627380	229	0.476884	-0.00619795	0.000204048	0.0482042	down	ENSG00000100299	ARSA	protein_coding	771	ENSG00000100299	ARSA	1
4	161402982	161403125	144	0.870335	0.00485023	0.000204389	0.0482389	up	ENSG00000168843	FSTL5	protein_coding	24028	ENSG00000249568	NA	0
8	133568434	133568480	47	0.798097	-0.00528679	0.000204463	0.0482389	down	ENSG00000008513	ST3GAL1	protein_coding	1898	ENSG00000008513	ST3GAL1	0
19	10228168	10228300	133	0.524157	-0.00860691	0.000204855	0.0482869	down	ENSG00000130816;ENSG00000267534	DNMT1;S1PR2	protein_coding;protein_coding	2112	ENSG00000264266	MIR4322	0
11	289828	290010	183	0.159678	-0.00719502	0.000204934	0.0482869	down	ENSG00000142102	PGGHG	protein_coding	0	ENSG00000142102	PGGHG	1
5	90758226	90758357	132	0.604907	0.00953783	0.000205322	0.0483467	up	ENSG00000164199	ADGRV1	protein_coding	1657	ENSG00000164199	ADGRV1	0
7	71136117	71136244	128	0.890889	-0.00279938	0.00020557	0.0483734	down	ENSG00000185274	GALNT17	protein_coding	3972	ENSG00000185274	GALNT17	0
22	44820697	44820772	76	0.41447	-0.0087187	0.00020627	0.0485064	down	ENSG00000248405;ENSG00000241484	PRR5-ARHGAP8;ARHGAP8	protein_coding;protein_coding	18876	ENSG00000241484	ARHGAP8	0
4	180797406	180797731	326	0.694072	0.00963481	0.000206429	0.0485121	up				38367	ENSG00000249883	NA	0
X	44513834	44513963	130	0.89944	0.00627166	0.000206587	0.0485177	up				28340	ENSG00000069509	FUNDC1	0
17	11766820	11766894	75	0.966159	-0.00167736	0.00020726	0.048644	down	ENSG00000007174	DNAH9	protein_coding	43710	ENSG00000007174	DNAH9	0
21	35181273	35181325	53	0.880151	0.0052734	0.000207809	0.0487174	up	ENSG00000159216	RUNX1	protein_coding	44634	ENSG00000234703	NA	0
9	137449126	137449459	334	0.937704	-0.0011951	0.000207975	0.0487174	down	ENSG00000165802	NSMF	protein_coding	626	ENSG00000284317	MIR7114	1
X	5860766	5860873	108	0.660007	0.0111906	0.000207979	0.0487174	up	ENSG00000146938	NLGN4X	protein_coding	42479	ENSG00000146938	NLGN4X	0
2	96375553	96375557	5	0.95436	-0.00283929	0.000208516	0.0488007	down	ENSG00000121152	NCAPH	protein_coding	11072	ENSG00000121152	NCAPH	0
14	97034565	97034700	136	0.078176	-0.00290294	0.000208605	0.0488007	down				26940	ENSG00000288034	NA	0
11	134124747	134125141	395	0.575045	0.0126905	0.000209284	0.0489279	up	ENSG00000166086	JAM3	protein_coding	417	ENSG00000254481	PTP4A2P2	1
X	2445152	2445184	33	0.778534	-0.00922352	0.000210179	0.0491018	down	ENSG00000169084	DHRSX	protein_coding	43786	ENSG00000214717	ZBED1	0
19	10226755	10226770	16	0.119381	-0.0050395	0.000210301	0.0491018	down	ENSG00000130816;ENSG00000267534	DNMT1;S1PR2	protein_coding;protein_coding	3642	ENSG00000264266	MIR4322	0
10	124740844	124740906	63	0.71353	-0.00878974	0.000210695	0.0491619	down	ENSG00000258539;ENSG00000189319	NA;FAM53B	protein_coding;protein_coding	2063	ENSG00000189319	FAM53B	0
2	169706901	169707021	121	0.895466	0.00502301	0.00021098	0.0491966	up	ENSG00000213160	KLHL23	protein_coding	9507	ENSG00000213160	KLHL23	0
5	1292789	1292813	25	0.0529585	-0.00354365	0.000211297	0.0492387	down	ENSG00000164362	TERT	protein_coding	2175	ENSG00000164362	TERT	0
1	1144715	1144905	191	0.932288	-0.00208412	0.000212139	0.0493381	down				7697	ENSG00000223823	LINC01342	0
2	27699656	27699656	1	0.952395	0.00369544	0.000212165	0.0493381	up				8097	ENSG00000163798	SLC4A1AP	0
21	44463892	44464018	127	0.912359	-0.0040992	0.000212353	0.0493381	down				8381	ENSG00000160233	LRRC3	0
1	179367375	179367662	288	0.12289	-0.00518111	0.000212531	0.0493381	down	ENSG00000162779	AXDND1	protein_coding	1238	ENSG00000162779	AXDND1	0
3	171358453	171358518	66	0.922271	-0.00419287	0.000212559	0.0493381	down	ENSG00000154310	TNIK	protein_coding	81007	ENSG00000222506	Y_RNA	0
17	28841022	28841082	61	0.131786	-0.00620997	0.000212651	0.0493381	down	ENSG00000173065	FAM222B	protein_coding	1644	ENSG00000173065	FAM222B	0
19	32280673	32280809	137	0.636408	0.00778262	0.000212682	0.0493381	up				36589	ENSG00000200738	RNA5SP472	0
7	150958692	150958752	61	0.0972866	-0.00452987	0.000212917	0.0493608	down	ENSG00000055118	KCNH2	protein_coding	2123	ENSG00000055118	KCNH2	0
17	30753195	30753250	56	0.952983	0.00247522	0.000213205	0.0493732	up	ENSG00000264538	SUZ12P1	transcribed_unprocessed_pseudogene	13252	ENSG00000264538	SUZ12P1	0
22	31343474	31343595	122	0.379161	-0.00752063	0.000213263	0.0493732	down	ENSG00000100105	PATZ1	protein_coding	0	ENSG00000100105	PATZ1	1
15	78619377	78619516	140	0.109793	-0.00325056	0.000213464	0.0493732	down	ENSG00000080644	CHRNA3	protein_coding	98	ENSG00000080644	CHRNA3	1
19	12725527	12725662	136	0.926404	-0.00176166	0.000213519	0.0493732	down	ENSG00000267004	NA	lncRNA	223	ENSG00000267004	NA	1
14	74301013	74301146	134	0.299712	-0.00786556	0.00021394	0.0494388	down	ENSG00000119688	ABCD4	protein_coding	1763	ENSG00000119688	ABCD4	0
16	69309871	69309875	5	0.247875	0.00736226	0.000214986	0.0496486	up	ENSG00000260914	NA	protein_coding	1474	ENSG00000132612	VPS4A	0
19	19545770	19545834	65	0.376991	-0.0143798	0.000215666	0.0497738	down	ENSG00000160161	CILP2	protein_coding	5110	ENSG00000160161	CILP2	0
8	140731027	140731256	230	0.95543	-0.00157669	0.000216984	0.0499779	down	ENSG00000169398	PTK2	protein_coding	1396	ENSG00000254324	MIR151A	0
17	47696485	47696546	62	0.806577	-0.00964131	0.000217032	0.0499779	down	ENSG00000198933	TBKBP1	protein_coding	799	ENSG00000198933	TBKBP1	1
1	161725379	161725416	38	0.100082	-0.00393607	0.000217094	0.0499779	down	ENSG00000162746	FCRLB	protein_coding	484	ENSG00000162746	FCRLB	1
14	106634694	106634818	125	0.469111	0.011213	0.000217105	0.0499779	up				1853	ENSG00000199480	RNA5SP389	0
