# Supplementary material for: Age-related methylation changes in the human sperm epigenome
Source: Aging (Albany NY). 2023 Feb 27;15(5):1257–78. doi: 10.18632/aging.204546 (PMC10042684; doi:10.18632/aging.204546)
Supplement: Supplementary Table 3 [file aging-15-204546-s004.pdf]

**Supplementary Table 3. Correlations between sperm donor age and mean methylation of selected ageDMRs.**

| Gene           | DMR location   | Function                                                                                                                                                                                                                               | Bisulfite pyrosequencing              |                          |                                     |
|----------------|----------------|----------------------------------------------------------------------------------------------------------------------------------------------------------------------------------------------------------------------------------------|---------------------------------------|--------------------------|-------------------------------------|
|                |                |                                                                                                                                                                                                                                        | Methylation (%)<br>mean±SD<br>[range] | Pearson's<br>correlation | FDR-<br>adjusted <i>P</i><br>value* |
| <i>EEF1A2</i>  | Promoter       | Encodes an isoform of the alpha subunit of the elongation factor 1 complex. Plays an essential role in protein synthesis by transporting aminoacyl-tRNA to the A-site of the ribosome. Expressed in brain, heart, and skeletal muscle. | 14.7±7.7<br>[1.9-41.6]                | -0.23                    | 0.04                                |
| <i>MBD3</i>    | Promoter       | Encodes methyl-CpG-binding domain protein 3. Involved in nucleosome remodeling, transcriptional repression, and histone deacetylase activities. Helps to maintain pluripotency of embryonic stem cells.                                | 55.3±8.7<br>[34.3-77.6]               | -0.25                    | 0.03                                |
| <i>PRAMI</i>   | Protein coding | Encodes PML-RARA-regulated adapter molecule 1. Expressed and regulated during normal myelopoiesis. Maybe involved in lipid binding, myeloid differentiation, and integrin signaling in neutrophils.                                    | 61.4±9.3<br>[32.3-79.1]               | -0.22                    | 0.04                                |
| <i>PRKAR2A</i> | Promoter       | Encodes cAMP-dependent protein kinase type II-alpha regulatory subunit. Involved in cAMP signaling in cells. Regulates protein transport from endosomes to the Golgi apparatus and further to the endoplasmic reticulum.               | 21.2±5.3<br>[8.0-36.7]                | -0.34                    | 0.001                               |

\*using the Benjamini-Hochberg method.
