# Supplementary material for: Age-related methylation changes in the human sperm epigenome
Source: Aging (Albany NY). 2023 Feb 27;15(5):1257–78. doi: 10.18632/aging.204546 (PMC10042684; doi:10.18632/aging.204546)
Supplement: Supplementary Table 4 [file aging-15-204546-s005.xlsx]

## Sheet: Table S4. Genes with ageDMRs.
Supplementary Table 4. Genes with sperm ageDMRs.
	Cao et al. (2020)	Denomme et al. (2020)*	Jenkins et al. (2014)	Jenkins et al. (2018)	Laurentino	Lee et al. (2015)	Oluwayiose et al. (2021)	ThisStudy	Total
DLGAP2	0	1	1	0	1	0	1	1	5
PRDM16	1	1	0	0	0	1	1	1	5
SLC22A18AS	0	1	1	1	0	0	1	1	5
C7orf50	0	0	1	0	1	1	1	0	4
KCNQ1	1	1	1	1	0	0	0	0	4
NCOR2	1	0	1	1	0	0	1	0	4
THBS3	1	0	1	1	0	0	1	0	4
TNXB	1	0	1	1	0	0	0	1	4
UTS2R	0	0	1	0	0	1	1	1	4
ADARB2	1	0	0	0	0	0	1	1	3
ANO1	1	1	0	0	0	0	0	1	3
ARID3C	1	0	0	0	0	0	1	1	3
BCL11A	0	0	1	1	0	0	1	0	3
BEGAIN	0	0	1	0	0	0	1	1	3
CRYBA2	1	0	1	0	0	0	1	0	3
DLL1	1	0	1	0	0	1	0	0	3
DMPK	0	0	1	1	0	0	0	1	3
FAM86JP	0	0	1	1	0	0	0	1	3
FBXO2	1	0	0	0	0	1	0	1	3
FGF8	0	0	0	0	0	1	1	1	3
GET4	0	0	1	1	0	0	1	0	3
GPANK1	0	0	1	1	0	0	1	0	3
GRIN1	0	0	1	0	0	0	1	1	3
KCNA7	1	0	1	0	0	0	1	0	3
LMO3	0	0	1	1	0	0	1	0	3
NSG1	0	0	1	1	0	0	1	0	3
NTM	1	1	0	0	0	0	1	0	3
PAX2	1	0	1	1	0	0	0	0	3
PCDH15	0	0	0	0	1	0	1	1	3
PINX1	1	0	0	0	0	0	1	1	3
PURA	0	0	1	1	0	0	1	0	3
PYY2	0	0	1	1	0	0	1	0	3
SECTM1	0	0	1	1	0	0	1	0	3
SEMA6B	0	0	1	1	0	0	0	1	3
SOHLH1	0	0	1	1	0	0	0	1	3
STRA8	1	0	0	0	0	1	0	1	3
TTC7B	0	0	1	0	0	1	1	0	3
WDR27	1	0	0	0	1	0	0	1	3
ABCA7	0	0	0	0	1	0	1	0	2
ABLIM1	0	0	0	0	0	1	1	0	2
ADAM33	0	0	0	0	0	0	1	1	2
ADAMTS16	1	0	0	0	0	0	1	0	2
ADAMTS8	0	0	1	1	0	0	0	0	2
ADRB3	0	0	0	0	0	1	1	0	2
AIM2	0	0	0	0	0	0	1	1	2
AJAP1	1	0	1	0	0	0	0	0	2
ANK2	1	0	0	0	0	0	1	0	2
ANKRD10	0	0	0	0	0	0	1	1	2
ANKS1B	0	0	0	0	0	0	1	1	2
ANP32AP1	0	0	0	0	1	0	1	0	2
ARC	0	0	1	1	0	0	0	0	2
ARHGAP39	0	0	0	0	0	0	1	1	2
ARHGEF1	1	0	0	0	0	0	0	1	2
ARMC3	1	0	0	0	0	0	1	0	2
ARPP21	1	0	0	0	0	0	1	0	2
ASB18	0	0	0	0	1	0	0	1	2
ATHL1	0	0	1	0	0	0	1	0	2
ATN1	0	0	1	0	0	0	1	0	2
ATXN7L3	1	0	1	0	0	0	0	0	2
B4GALNT1	1	0	0	0	0	0	0	1	2
B4GALNT4	0	1	0	0	0	0	1	0	2
BARHL1	1	0	0	0	0	0	0	1	2
BLCAP	0	0	1	0	0	1	0	0	2
BMP8A	0	0	0	0	0	1	0	1	2
C1orf86	1	0	0	0	0	0	1	0	2
CABS1	1	0	0	0	0	0	1	0	2
CALCA	0	0	1	0	0	0	0	1	2
CCDC114	0	0	1	0	0	0	1	0	2
CCDC144NL	0	0	1	1	0	0	0	0	2
CCDC182	1	0	0	0	0	0	1	0	2
CCR6	0	0	0	0	1	0	1	0	2
CDH13	1	0	0	0	0	0	1	0	2
CDH18	0	0	0	0	1	0	0	1	2
CDH22	1	0	0	0	0	0	0	1	2
CFD	0	0	1	0	0	0	1	0	2
CHMP1A	0	0	0	0	0	1	0	1	2
CHRNE	0	0	0	0	0	0	1	1	2
CHST8	1	0	0	0	0	0	0	1	2
CKAP4	1	0	0	0	0	0	0	1	2
CLIC1	0	0	1	1	0	0	0	0	2
COL23A1	1	0	0	0	0	0	0	1	2
COLGALT1	0	0	0	0	0	0	1	1	2
CRLF1	1	0	0	0	0	0	0	1	2
CROCC	1	0	0	0	0	0	0	1	2
DAPK3	0	0	1	0	0	1	0	0	2
DHRSX	0	0	0	0	1	0	0	1	2
DHX16	1	0	0	0	0	0	0	1	2
DLK1	0	1	0	0	0	0	0	1	2
DNMT1	0	1	0	0	0	0	0	1	2
DOHH	0	0	0	0	1	0	0	1	2
DOK2	0	0	0	0	0	0	1	1	2
DSEL-AS1	0	0	0	0	1	0	0	1	2
DVL1	0	1	0	0	0	0	0	1	2
EEF1A2	0	0	0	0	0	0	1	1	2
EFCAB4A	0	0	1	0	0	0	1	0	2
EGFL7	0	1	0	0	0	0	0	1	2
EHMT1	0	0	0	0	0	0	1	1	2
EPDR1	0	0	0	0	0	0	1	1	2
EPHA10	0	0	0	0	1	0	0	1	2
EPHB4	0	0	0	0	1	0	0	1	2
EPN2	0	0	0	0	1	0	0	1	2
EPS8L1	1	0	0	0	0	0	1	0	2
EVX1	1	0	0	0	0	0	1	0	2
EXPH5	0	0	0	0	0	0	1	1	2
FAM86C1	0	0	1	1	0	0	0	0	2
FBN3	0	0	0	0	0	0	1	1	2
FBRSL1	0	1	0	0	0	0	0	1	2
FGF3	1	0	0	0	0	0	0	1	2
FOXF2	0	0	1	0	0	0	0	1	2
FOXK1	0	0	1	1	0	0	0	0	2
FSCN1	0	0	1	0	0	1	0	0	2
GABRB3	1	0	0	0	0	0	0	1	2
GALNT9	0	0	0	0	0	0	1	1	2
GAPDH	0	0	1	1	0	0	0	0	2
GATA2	0	0	0	0	0	0	1	1	2
GNB2	0	0	1	1	0	0	0	0	2
GNG7	0	0	0	0	0	0	1	1	2
GPC1	0	0	0	0	0	0	1	1	2
GPER1	0	0	0	0	1	0	1	0	2
GPR151	1	0	0	0	0	0	1	0	2
GPR45	0	0	1	1	0	0	0	0	2
GPT2	0	0	0	0	0	0	1	1	2
HM13	0	1	0	0	0	0	0	1	2
HOXA10	0	0	1	0	0	0	1	0	2
HOXB6	1	0	0	0	0	0	1	0	2
HOXD10	0	0	0	0	0	1	1	0	2
HYAL2	0	0	0	0	0	0	1	1	2
IGF1	1	0	0	0	0	0	1	0	2
IGF2	0	1	0	0	0	0	1	0	2
IGSF10	1	0	0	0	0	0	1	0	2
IGSF21	1	0	0	0	0	0	1	0	2
INSRR	0	0	0	0	0	0	1	1	2
JAM3	0	0	0	0	1	0	0	1	2
KCNIP4	1	0	0	0	0	0	0	1	2
KCNQ2	0	0	0	0	0	0	1	1	2
KDM2B	0	0	1	0	0	0	0	1	2
KDM4B	1	0	0	0	0	0	0	1	2
KRT19	0	0	1	0	0	0	1	0	2
KRT40	1	0	0	0	0	0	1	0	2
LAMA2	0	0	0	0	0	0	1	1	2
LCK	1	0	0	0	0	0	0	1	2
LDLRAD4	0	0	1	1	0	0	0	0	2
LHX1	1	0	0	0	0	0	1	0	2
LHX3	0	0	0	0	0	0	1	1	2
LINC02182	0	0	0	0	1	0	0	1	2
LINGO1	0	0	0	0	0	0	1	1	2
LMNB2	0	0	0	0	1	0	1	0	2
LOC100133461	0	0	1	1	0	0	0	0	2
LONP1	0	0	1	0	0	0	0	1	2
LRCH4	0	0	0	0	0	0	1	1	2
LRFN2	0	0	1	0	0	0	1	0	2
MACROD1	0	0	0	0	0	0	1	1	2
MALRD1	0	0	0	0	1	0	0	1	2
MAP3K10	0	0	0	0	0	0	1	1	2
MAPK8IP2	0	0	0	0	0	0	1	1	2
MCTP2	1	0	0	0	1	0	0	0	2
METRNL	1	0	0	0	0	1	0	0	2
MIR22HG	0	0	1	1	0	0	0	0	2
MIR9-3	0	0	1	0	0	0	1	0	2
MN1	1	0	0	0	0	0	1	0	2
MRPL36	0	0	1	0	0	1	0	0	2
MTMR8	0	0	1	1	0	0	0	0	2
MUC1	0	0	0	0	0	0	1	1	2
NADK	0	0	1	0	0	0	1	0	2
NAP1L4	0	1	0	0	0	0	1	0	2
NCDN	0	0	0	0	0	0	1	1	2
NINJ2	0	0	0	0	0	0	1	1	2
NPL	0	0	0	0	0	1	0	1	2
NR4A2	1	0	0	0	0	0	1	0	2
NSMF	0	0	1	0	0	0	0	1	2
NSUN5	0	0	0	0	0	1	0	1	2
NXPH4	0	0	0	0	1	0	0	1	2
NYAP2	1	0	0	0	0	0	0	1	2
PAX3	1	0	0	0	0	0	1	0	2
PAX6	1	0	0	0	0	0	1	0	2
PCDH17	1	0	0	0	0	0	1	0	2
PCGF3	0	0	0	0	0	0	1	1	2
PCLO	1	0	0	0	0	0	1	0	2
PCOLCE	1	0	1	0	0	0	0	0	2
PDLIM3	1	0	0	0	0	0	1	0	2
PITX1	0	0	1	1	0	0	0	0	2
PLK5	0	0	0	0	0	0	1	1	2
PPFIA2	1	0	0	0	0	0	0	1	2
PPP1R18	1	0	1	0	0	0	0	0	2
PPP1R27	0	0	0	0	0	1	0	1	2
PPP2R2C	0	0	0	0	1	0	1	0	2
PPP2R2D	1	0	0	0	0	0	0	1	2
PPP2R5B	0	0	0	0	0	0	1	1	2
PPP2R5E	0	0	0	0	1	0	0	1	2
PRKCZ	1	0	0	0	0	0	0	1	2
PRRC2A	1	0	0	0	0	0	1	0	2
PRSS22	0	0	1	1	0	0	0	0	2
PSMB8	1	0	0	0	0	0	1	0	2
PTPRS	1	0	0	0	0	0	1	0	2
RASA3	0	0	0	0	0	0	1	1	2
RBFOX1	1	0	0	0	0	0	0	1	2
RPL13	0	0	0	0	0	0	1	1	2
RUBCN	0	0	0	0	1	0	0	1	2
RYR2	1	0	0	0	0	0	1	0	2
SAP25	0	0	0	0	0	0	1	1	2
SDCCAG8	1	0	0	0	1	0	0	0	2
SEMA3A	0	0	0	0	1	0	0	1	2
SETBP1	1	0	0	0	0	0	1	0	2
SEZ6	0	0	1	1	0	0	0	0	2
SHANK2	1	0	0	0	0	0	0	1	2
SLC14A2	1	0	0	0	0	0	0	1	2
SLC24A5	1	0	0	0	0	0	1	0	2
SLC26A10	1	0	0	0	0	0	1	0	2
SLC4A2	0	1	0	0	1	0	0	0	2
SLC8A2	0	0	0	0	1	0	0	1	2
SNHG1	0	0	1	0	0	0	0	1	2
SNTG2	0	0	0	0	1	0	1	0	2
SORBS2	1	0	0	0	0	0	1	0	2
SRSF5	0	0	0	0	1	0	0	1	2
SRSF7	1	0	0	0	0	0	1	0	2
SSTR5	0	0	1	0	0	0	1	0	2
ST5	1	0	0	0	0	0	1	0	2
STOX2	1	0	0	0	0	0	1	0	2
STX2	0	0	0	0	0	1	0	1	2
SYNE4	0	0	1	0	0	0	1	0	2
TBKBP1	0	0	1	0	0	0	0	1	2
TBX5	0	0	1	0	0	0	1	0	2
TCL6	0	0	0	0	0	1	1	0	2
TENM3	1	0	0	0	0	0	1	0	2
TFEB	0	0	0	0	0	1	0	1	2
THBS2	1	0	0	0	0	0	1	0	2
TIMM13	1	0	0	0	0	0	0	1	2
TIMM44	0	0	0	0	0	0	1	1	2
TINAG	1	0	0	0	0	0	1	0	2
TMEM132D	1	0	0	0	1	0	0	0	2
TMEM59L	1	0	0	0	0	0	0	1	2
TNK2	0	0	0	0	0	1	0	1	2
TP73	0	1	0	0	1	0	0	0	2
TUBB	0	0	0	0	0	0	1	1	2
UNKL	0	0	1	0	0	0	0	1	2
XKR6	1	0	0	0	0	0	0	1	2
YPEL4	1	0	0	0	0	0	1	0	2
ZFHX3	1	0	0	0	0	0	0	1	2
ZNF516	0	0	0	0	1	0	1	0	2
ZNF536	1	0	0	0	0	0	0	1	2
ZNF853	1	0	0	0	1	0	0	0	2
A1BG	0	0	0	0	0	0	0	1	1
A1BG-AS1	0	0	0	0	0	0	0	1	1
AACS	0	0	0	0	0	0	0	1	1
AARS1	0	0	0	0	0	0	0	1	1
AASS	0	0	0	0	0	0	0	1	1
AATK-AS1	0	0	0	0	0	0	1	0	1
ABCD1	0	0	0	0	0	0	0	1	1
ABCD4	0	0	0	0	0	0	0	1	1
ABCG8	0	0	0	0	0	0	0	1	1
ABHD17AP5	0	0	0	0	0	0	0	1	1
ABHD18	0	0	0	0	0	0	0	1	1
ABR	0	0	0	0	0	0	1	0	1
ABTB2	0	0	0	0	1	0	0	0	1
AC004066	0	0	0	0	0	0	1	0	1
AC005017	0	0	0	0	0	0	1	0	1
AC006026	0	0	0	0	0	0	1	0	1
AC006947	0	0	0	0	0	0	1	0	1
AC007131	0	0	0	0	0	0	1	0	1
AC007362	0	0	0	0	0	0	1	0	1
AC007436	0	0	0	0	0	0	1	0	1
AC008060	0	0	0	0	0	0	1	0	1
AC008703	0	0	0	0	0	0	1	0	1
AC009531	0	0	0	0	0	0	1	0	1
AC011742	0	0	0	0	0	0	1	0	1
AC011899	0	0	0	0	0	0	1	0	1
AC018442	0	0	0	0	0	0	1	0	1
AC018696	0	0	0	0	0	0	1	0	1
AC018755	0	0	0	0	0	0	1	0	1
AC079779	0	0	0	0	0	0	1	0	1
AC093702	0	0	0	0	0	0	1	0	1
AC104809	0	0	0	0	0	0	1	0	1
AC127383	0	0	0	0	0	0	1	0	1
AC138430	0	0	0	0	0	0	1	0	1
AC147651	0	0	0	0	0	0	1	0	1
ACA64	0	0	0	0	0	0	1	0	1
ACADS	0	0	0	0	0	0	0	1	1
ACBD4	0	0	0	0	0	0	0	1	1
ACER3	0	0	0	0	0	0	0	1	1
ACOX1	0	0	0	0	0	0	0	1	1
ACOX3	0	0	0	0	0	0	0	1	1
ACSS3	1	0	0	0	0	0	0	0	1
ACTB	0	0	0	0	0	0	0	1	1
ACTG1	0	0	0	0	0	0	1	0	1
ACTL10	0	0	0	0	0	0	1	0	1
ACTL7B	0	0	0	0	0	0	1	0	1
ACTL8	1	0	0	0	0	0	0	0	1
ACVR1	1	0	0	0	0	0	0	0	1
ACVR1C	1	0	0	0	0	0	0	0	1
ADAM12	1	0	0	0	0	0	0	0	1
ADAMTS15	1	0	0	0	0	0	0	0	1
ADAMTS19	0	0	0	0	0	0	0	1	1
ADAMTS2	0	0	0	0	0	0	0	1	1
ADAMTS5	1	0	0	0	0	0	0	0	1
ADAMTSL2	0	0	0	0	0	0	0	1	1
ADAMTSL5	0	0	0	0	0	0	0	1	1
ADCK2	0	0	0	0	0	0	0	1	1
ADGRB1	0	0	0	0	0	0	0	1	1
ADGRD2	0	0	0	0	0	0	0	1	1
ADGRL1	0	0	0	0	0	0	0	1	1
ADGRV1	0	0	0	0	0	0	0	1	1
ADPGK-AS1	0	0	0	0	0	0	1	0	1
ADRA2C	1	0	0	0	0	0	0	0	1
ADTRP	0	1	0	0	0	0	0	0	1
AEN	0	0	0	0	0	0	0	1	1
AFF4	0	0	0	0	1	0	0	0	1
AFG3L1P	0	0	0	0	0	0	0	1	1
AGBL1	1	0	0	0	0	0	0	0	1
AGBL5	1	0	0	0	0	0	0	0	1
AGMO	0	0	0	0	0	0	0	1	1
AGR2	0	0	0	0	0	0	1	0	1
AGRN	0	0	1	0	0	0	0	0	1
AGTRAP	1	0	0	0	0	0	0	0	1
AHCTF1	1	0	0	0	0	0	0	0	1
AHCY	0	0	0	0	1	0	0	0	1
AHDC1	0	0	0	0	0	0	0	1	1
AHNAK	0	0	0	0	0	0	0	1	1
AHRR	0	0	0	0	0	0	0	1	1
AIFM2	0	0	0	0	0	0	1	0	1
AIMP2	0	0	0	0	0	0	0	1	1
AK1	0	0	0	0	0	0	0	1	1
AKAP17A	0	0	0	0	0	0	0	1	1
AKAP8L	0	0	0	0	0	0	1	0	1
AKR1E2	1	0	0	0	0	0	0	0	1
AKT2	1	0	0	0	0	0	0	0	1
AKT3	1	0	0	0	0	0	0	0	1
AL512652	0	0	0	0	0	0	1	0	1
ALDH1L1	0	1	0	0	0	0	0	0	1
ALDH3A1	0	0	0	0	0	0	0	1	1
ALDOA	0	0	0	0	0	0	0	1	1
ALG1L	0	0	0	0	0	0	0	1	1
ALOX5	0	0	0	0	0	0	0	1	1
ALOX5AP	1	0	0	0	0	0	0	0	1
ALPK3	0	0	0	0	0	0	1	0	1
ALPL	0	0	0	0	0	0	1	0	1
ANKFY1	0	0	0	0	0	1	0	0	1
ANKRD1	0	0	0	0	0	0	1	0	1
ANKRD11	0	0	0	0	0	0	1	0	1
ANKRD16	0	0	0	0	0	0	0	1	1
ANO7	0	0	0	0	0	0	0	1	1
ANO9	0	0	0	0	0	0	0	1	1
ANXA3	0	0	0	0	0	0	1	0	1
AP000697	0	0	0	0	0	0	1	0	1
AP001258	0	0	0	0	0	0	1	0	1
AP1S1	0	0	0	0	0	0	0	1	1
AP4E1	0	0	0	0	0	0	0	1	1
APAF1	1	0	0	0	0	0	0	0	1
APBA2	0	0	1	0	0	0	0	0	1
APBB1IP	1	0	0	0	0	0	0	0	1
APOA5	0	0	0	0	0	0	1	0	1
APOC1	0	0	0	0	0	0	0	1	1
APOC1P1	0	0	0	0	0	0	1	0	1
APOD	1	0	0	0	0	0	0	0	1
ARAP1	0	0	0	0	0	0	1	0	1
ARFGAP3	0	0	0	0	0	0	1	0	1
ARGHGEF10	0	0	0	1	0	0	0	0	1
ARHGAP1	0	0	0	0	0	0	0	1	1
ARHGAP11B-DT	0	0	0	0	1	0	0	0	1
ARHGAP15	1	0	0	0	0	0	0	0	1
ARHGAP20	1	0	0	0	0	0	0	0	1
ARHGAP22	0	0	0	0	0	0	1	0	1
ARHGAP24	0	0	0	0	0	0	1	0	1
ARHGAP35	0	0	0	0	0	0	0	1	1
ARHGAP45	0	0	0	0	0	0	0	1	1
ARHGAP8	0	0	0	0	0	0	0	1	1
ARHGDIA	0	0	0	0	0	0	0	1	1
ARHGEF10	0	0	1	0	0	0	0	0	1
ARHGEF10L	0	0	0	0	0	0	1	0	1
ARHGEF16	1	0	0	0	0	0	0	0	1
ARHGEF17	0	0	0	0	0	0	0	1	1
ARHGEF4	0	0	0	0	0	0	0	1	1
ARL4A	0	0	0	0	0	0	1	0	1
ARL6IP4	0	0	0	0	0	0	0	1	1
ARNILA	0	0	0	0	0	0	0	1	1
ARRB1	0	0	0	0	0	0	1	0	1
ARRDC4	1	0	0	0	0	0	0	0	1
ARSA	0	0	0	0	0	0	0	1	1
ARSD	0	0	0	0	0	1	0	0	1
ARTN	0	0	0	0	0	0	1	0	1
ASAP3	0	0	0	0	0	0	0	1	1
ASB1	1	0	0	0	0	0	0	0	1
ASB5	0	0	0	0	0	0	1	0	1
ASCC1	1	0	0	0	0	0	0	0	1
ASCL1	1	0	0	0	0	0	0	0	1
ASPHD2	0	0	0	0	0	0	1	0	1
ASPSCR1	0	0	0	0	0	0	0	1	1
ATAD3A	0	0	0	0	0	0	0	1	1
ATF6B	1	0	0	0	0	0	0	0	1
ATG4D	0	0	0	0	0	0	0	1	1
ATG5	0	0	0	0	0	0	0	1	1
ATG9B	0	0	0	0	0	0	0	1	1
ATL1	0	0	0	0	0	0	0	1	1
ATP10A	1	0	0	0	0	0	0	0	1
ATP11A	0	0	0	0	0	1	0	0	1
ATP1A4	0	0	0	0	0	0	1	0	1
ATP5F1A	0	0	0	0	0	0	0	1	1
ATP5MG	0	0	0	0	0	0	0	1	1
ATP6V0A4	0	0	0	0	0	0	1	0	1
ATP6V0D2	0	0	0	0	0	0	1	0	1
ATP6V1E1	0	0	0	0	0	0	0	1	1
ATP6V1G2-DDX39B	0	0	0	0	0	0	0	1	1
ATP8B2	0	0	0	0	0	0	1	0	1
ATP9B	1	0	0	0	0	0	0	0	1
ATXN2L	0	0	0	0	0	0	0	1	1
ATXN7L1	0	0	0	0	0	0	1	0	1
AXDND1	0	0	0	0	0	0	0	1	1
B3GALT6	0	0	0	0	0	0	1	0	1
B3GNT7	0	0	0	0	0	0	0	1	1
B3GNTL1	0	0	0	0	0	0	0	1	1
B4GALNT3	0	0	0	0	0	0	1	0	1
BACH1	1	0	0	0	0	0	0	0	1
BAD	0	0	0	0	0	0	1	0	1
BAG6	1	0	0	0	0	0	0	0	1
BAI1	0	0	0	0	0	0	1	0	1
BCAN	0	0	0	0	0	0	1	0	1
BCAP31	0	0	0	0	0	1	0	0	1
BCAR4	0	0	0	0	0	0	0	1	1
BCAT2	0	0	0	0	0	0	1	0	1
BCL11B	0	0	0	0	0	0	0	1	1
BCL2A1	0	0	0	0	0	0	1	0	1
BCL2L10	0	0	0	0	0	0	0	1	1
BCL2L13	0	0	0	0	0	0	0	1	1
BCL2L2	0	0	0	0	0	0	0	1	1
BCL2L2-PABPN1	0	0	0	0	0	0	0	1	1
BCL3	0	0	0	0	0	0	1	0	1
BCL6B	0	0	0	0	1	0	0	0	1
BCL7A	1	0	0	0	0	0	0	0	1
BCL7C	0	0	0	0	0	0	1	0	1
BECN1	0	0	0	0	0	0	0	1	1
BEST2	0	0	0	0	0	0	0	1	1
BEST3	0	0	0	0	0	0	1	0	1
BFSP1	0	0	0	0	0	0	0	1	1
BICDL2	0	0	0	0	0	0	0	1	1
BID	0	0	0	0	1	0	0	0	1
BMP10	1	0	0	0	0	0	0	0	1
BMPR2	0	0	0	0	1	0	0	0	1
BNC2	1	0	0	0	0	0	0	0	1
BNIP2	1	0	0	0	0	0	0	0	1
BOP1	0	0	0	0	0	0	0	1	1
BRAT1	0	0	0	0	0	0	0	1	1
BRD7P4	0	0	0	0	0	0	1	0	1
BRD7P5	0	0	0	0	0	0	1	0	1
BRF1	0	0	0	0	0	0	0	1	1
BRIP1	0	0	0	0	0	0	0	1	1
BRMS1L	1	0	0	0	0	0	0	0	1
BRSK2	0	0	0	0	0	0	1	0	1
BTBD11	0	0	0	0	0	0	1	0	1
BTBD18	0	0	0	0	0	0	1	0	1
BTBD6	0	0	0	0	0	0	0	1	1
BTN2A2	0	0	0	0	0	0	1	0	1
C10orf25	0	0	0	0	0	0	1	0	1
C10orf90	1	0	0	0	0	0	0	0	1
C11orf31	0	0	0	0	0	0	1	0	1
C11orf44	1	0	0	0	0	0	0	0	1
C11orf63	0	0	0	0	0	0	1	0	1
C11orf68	0	0	0	0	0	0	0	1	1
C11orf80	0	0	0	0	0	0	0	1	1
C11orf84	0	0	0	0	0	1	0	0	1
C11orf96	0	0	0	0	0	0	0	1	1
C15orf59	0	0	0	0	0	0	1	0	1
C16orf13	0	0	0	0	0	0	1	0	1
C17orf70	0	0	0	0	0	0	1	0	1
C19orf25	0	0	0	0	0	0	0	1	1
C19orf67	0	0	0	0	0	0	0	1	1
C1orf122	0	0	1	0	0	0	0	0	1
C1ORF122	0	0	0	1	0	0	0	0	1
C1orf162	0	0	0	0	0	0	1	0	1
C1QTNF1	0	0	0	0	0	0	0	1	1
C1QTNF1-AS1	0	0	0	0	0	0	0	1	1
C1QTNF4	0	0	0	0	0	0	0	1	1
C1QTNF7	0	0	0	0	0	0	1	0	1
C1R	0	0	0	0	0	0	1	0	1
C20ORF135	0	0	0	0	0	0	1	0	1
C20orf144	0	0	0	0	0	0	0	1	1
C22orf15	0	0	0	0	0	0	1	0	1
C2CD4C	0	0	0	0	0	0	1	0	1
C2orf78	0	0	0	0	0	0	1	0	1
C2orf81	0	0	0	0	0	0	0	1	1
C4orf50	0	0	0	0	0	0	0	1	1
C5orf25	0	0	0	0	0	1	0	0	1
C6orf48	0	0	1	0	0	0	0	0	1
C7orf13	1	0	0	0	0	0	0	0	1
C7orf26	0	0	0	0	0	0	0	1	1
C7orf33	0	0	0	0	0	0	1	0	1
C7orf49	0	0	0	0	0	0	1	0	1
C7ORF50	0	0	0	1	0	0	0	0	1
C9orf139	0	0	0	0	0	0	1	0	1
CA4	1	0	0	0	0	0	0	0	1
CABP1	0	0	0	0	0	0	0	1	1
CABP5	0	0	0	0	0	0	1	0	1
CACNA1D	0	0	0	0	0	0	0	1	1
CACNA1H	0	0	1	0	0	0	0	0	1
CACNA1S	0	0	0	0	0	0	1	0	1
CACNA2D1	1	0	0	0	0	0	0	0	1
CACNG3	0	0	0	0	0	0	1	0	1
CACNG5	1	0	0	0	0	0	0	0	1
CACTIN	0	0	0	0	0	0	0	1	1
CACTIN-AS1	0	0	0	0	0	0	0	1	1
CADM1	1	0	0	0	0	0	0	0	1
CADM2	0	0	0	0	0	0	0	1	1
CADPS	0	0	0	0	0	0	0	1	1
CALCB	0	0	0	0	0	0	0	1	1
CALN1	0	0	0	0	0	0	1	0	1
CALY	0	0	0	0	0	1	0	0	1
CAMK2A	0	0	0	0	0	0	1	0	1
CAMK2D	1	0	0	0	0	0	0	0	1
CAMKK1	0	0	0	0	0	0	1	0	1
CAMKV	0	0	0	0	0	0	1	0	1
CAMSAP3	0	0	0	0	0	0	0	1	1
CAND1	1	0	0	0	0	0	0	0	1
CAPG	0	0	0	0	0	0	0	1	1
CAPN14	0	0	0	0	0	0	1	0	1
CAPRIN1	0	0	0	0	0	0	0	1	1
CAPZB	1	0	0	0	0	0	0	0	1
CARD18	0	0	0	0	0	0	0	1	1
CARD9	0	0	0	0	0	0	0	1	1
CASC3	0	0	0	0	0	0	0	1	1
CASC6	0	0	0	0	0	0	1	0	1
CASTOR3	0	0	0	0	0	0	0	1	1
CATSPERZ	0	0	0	0	0	0	0	1	1
CBARP	0	0	0	0	0	0	0	1	1
CBFA2T3	0	0	0	0	0	0	0	1	1
CBLN3	1	0	0	0	0	0	0	0	1
CBR3-AS1	0	0	0	0	0	0	1	0	1
CBX5	1	0	0	0	0	0	0	0	1
CCDC117	0	0	0	0	0	0	0	1	1
CCDC127	0	0	0	0	0	0	0	1	1
CCDC159	0	0	0	0	0	0	1	0	1
CCDC17	0	0	0	0	0	0	1	0	1
CCDC26	0	0	0	0	1	0	0	0	1
CCDC3	0	0	0	0	0	0	1	0	1
CCDC40	0	0	0	0	0	0	1	0	1
CCDC78	0	0	0	0	0	0	1	0	1
CCDC88C	0	0	0	0	0	0	0	1	1
CCDC9	0	0	0	0	0	0	0	1	1
CCDC96	1	0	0	0	0	0	0	0	1
CCKBR	0	0	0	0	0	0	1	0	1
CCND1	1	0	0	0	0	0	0	0	1
CCNE1	1	0	0	0	0	0	0	0	1
CCNF	0	0	0	0	0	0	0	1	1
CCNO	0	0	0	0	0	0	1	0	1
CCR10	0	0	0	0	0	0	1	0	1
CCRN4L	1	0	0	0	0	0	0	0	1
CCSER1	0	0	0	0	0	0	0	1	1
CCT3	0	0	0	0	0	0	0	1	1
CD180	1	0	0	0	0	0	0	0	1
CD2BP2	0	0	0	0	0	0	0	1	1
CD300E	0	0	0	0	0	1	0	0	1
CD300LB	0	0	0	0	0	0	1	0	1
CD36	0	0	0	0	0	0	0	1	1
CD3EAP	1	0	0	0	0	0	0	0	1
CD40	1	0	0	0	0	0	0	0	1
CD6	0	0	0	0	0	0	1	0	1
CD81	0	0	0	0	0	0	0	1	1
CD8A	0	0	0	0	0	0	1	0	1
CD99L2	0	0	0	0	0	0	0	1	1
CDCA3	0	0	0	0	0	0	1	0	1
CDH11	0	0	0	0	0	0	1	0	1
CDH12	0	0	0	0	0	0	0	1	1
CDH18-AS1	0	0	0	0	0	0	0	1	1
CDH19	0	0	0	0	0	0	0	1	1
CDH2	1	0	0	0	0	0	0	0	1
CDH24	0	0	0	0	0	0	1	0	1
CDH26	1	0	0	0	0	0	0	0	1
CDH4	1	0	0	0	0	0	0	0	1
CDH8	1	0	0	0	0	0	0	0	1
CDK15	0	0	0	0	0	0	1	0	1
CDK2AP1	0	0	0	0	0	0	0	1	1
CDKN1A	0	0	0	0	1	0	0	0	1
CDKN1C	1	0	0	0	0	0	0	0	1
CDKN2D	0	0	0	0	0	0	1	0	1
CDR1	1	0	0	0	0	0	0	0	1
CDX1	0	0	0	0	0	0	0	1	1
CELF5	0	0	0	0	0	0	0	1	1
CELSR2	1	0	0	0	0	0	0	0	1
CEP112	0	0	0	0	0	0	0	1	1
CEP128	0	0	0	0	0	0	0	1	1
CEP131	0	0	0	0	0	0	0	1	1
CEP170B	0	0	0	0	0	0	0	1	1
CEP44	1	0	0	0	0	0	0	0	1
CERK	0	0	0	0	0	0	1	0	1
CHAT	0	0	0	0	0	0	1	0	1
CHD5	0	0	0	0	0	0	1	0	1
CHIT1	0	0	0	0	0	0	1	0	1
CHKA-DT	0	0	0	0	0	0	0	1	1
CHL1	1	0	0	0	0	0	0	0	1
CHN2	0	0	0	0	0	0	1	0	1
CHRNA2	0	0	0	0	0	0	1	0	1
CHRNA3	0	0	0	0	0	0	0	1	1
CHRNA4	0	0	0	0	0	0	0	1	1
CHRNB1	0	0	0	0	0	0	1	0	1
CHST5	0	0	0	0	0	0	0	1	1
CHST9	1	0	0	0	0	0	0	0	1
CHTF18	0	0	0	0	0	0	0	1	1
CIAO3	0	0	0	0	0	0	0	1	1
CILP2	0	0	0	0	0	0	0	1	1
CIRBP	0	0	0	0	0	0	1	0	1
CIRBP-AS1	0	0	0	0	0	0	1	0	1
CIT	0	0	0	0	0	0	1	0	1
CLCN5	0	0	0	0	0	0	0	1	1
CLDN15	0	0	0	0	0	0	0	1	1
CLDN17	0	0	0	0	0	0	1	0	1
CLDN18	1	0	0	0	0	0	0	0	1
CLEC12B	0	0	0	0	0	0	1	0	1
CLEC16A	0	0	0	0	0	0	0	1	1
CLEC1A	0	0	0	0	0	0	1	0	1
CLEC2A	0	0	0	0	0	0	1	0	1
CLIP2	0	0	0	0	0	0	0	1	1
CLPP	0	0	0	0	0	0	0	1	1
CLPSL2	0	0	0	0	0	1	0	0	1
CLSTN1	0	0	0	0	0	0	0	1	1
CMPK2	1	0	0	0	0	0	0	0	1
CNBD1	0	0	0	0	0	0	0	1	1
CNBD2	0	0	0	0	0	0	0	1	1
CNIH3	1	0	0	0	0	0	0	0	1
CNN1	0	0	1	0	0	0	0	0	1
CNOT4	1	0	0	0	0	0	0	0	1
CNPY1	0	0	0	0	0	0	0	1	1
CNTD1	1	0	0	0	0	0	0	0	1
CNTN4	0	0	0	0	0	0	1	0	1
CNTN6	1	0	0	0	0	0	0	0	1
CNTNAP1	0	0	1	0	0	0	0	0	1
CNTNAP2	0	0	0	0	0	0	0	1	1
CNTNAP5	1	0	0	0	0	0	0	0	1
COA3	1	0	0	0	0	0	0	0	1
COA8	0	0	0	0	0	0	0	1	1
COASY	0	0	0	0	0	0	0	1	1
COCH	0	0	0	0	0	0	0	1	1
COL4A4	1	0	0	0	0	0	0	0	1
COL7A1	0	0	0	0	0	0	1	0	1
COL9A3	0	0	0	0	0	0	0	1	1
COLCA2	1	0	0	0	0	0	0	0	1
COMP	0	0	0	0	0	0	1	0	1
COPE	0	0	0	0	0	0	0	1	1
CORIN	0	0	0	0	1	0	0	0	1
COTL1	0	0	0	0	0	0	0	1	1
COX10-AS1	0	0	0	0	0	0	0	1	1
COX5A	0	0	0	0	0	0	0	1	1
COX7B2	0	0	0	0	1	0	0	0	1
COX8A	0	0	0	0	0	0	0	1	1
CPEB3	0	0	0	0	0	0	0	1	1
CPLX1	0	0	0	0	0	0	1	0	1
CPN1	0	0	0	0	0	0	1	0	1
CPN2	0	0	0	0	0	0	1	0	1
CPNE8	1	0	0	0	0	0	0	0	1
CPSF1	0	0	0	0	0	0	0	1	1
CPSF7	0	0	0	0	0	0	0	1	1
CRIP2	0	0	0	0	0	0	0	1	1
CROCC2	0	0	0	0	0	0	0	1	1
CROCCP2	0	0	0	0	0	0	0	1	1
CRP	0	0	0	0	0	0	1	0	1
CRYBA4	1	0	0	0	0	0	0	0	1
CRYBG3	0	0	0	0	0	0	1	0	1
CSAD	0	0	0	0	0	0	0	1	1
CSF2RA	0	0	0	0	0	0	0	1	1
CSGALNACT1	0	0	0	0	0	0	1	0	1
CSK	0	0	0	0	0	0	0	1	1
CSMD1	0	0	0	0	0	0	0	1	1
CSMD3	0	0	0	0	0	0	0	1	1
CSN3	1	0	0	0	0	0	0	0	1
CSNK1A1	0	0	0	0	0	0	0	1	1
CSNK1G2	0	0	0	0	0	0	0	1	1
CSRNP3	1	0	0	0	0	0	0	0	1
CSRP3	0	0	0	0	0	0	1	0	1
CSTF3	0	0	0	0	0	0	0	1	1
CTA-384D8	0	0	0	0	0	0	1	0	1
CTAG2	0	0	0	0	0	1	0	0	1
CTB-127C13	0	0	0	0	0	0	1	0	1
CTC-246B18	0	0	0	0	0	0	1	0	1
CTD-2135J3	0	0	0	0	0	0	1	0	1
CTD-2194D22	0	0	0	0	0	0	1	0	1
CTD-2313P7	0	0	0	0	0	0	1	0	1
CTD-2319I12	0	0	0	0	0	0	1	0	1
CTD-2514K5	0	0	0	0	0	0	1	0	1
CTD-2538C1	0	0	0	0	0	0	1	0	1
CTD-2561B21	0	0	0	0	0	0	1	0	1
CTD-2619J13	0	0	0	0	0	0	1	0	1
CTF1	0	0	1	0	0	0	0	0	1
CTNNA2	0	0	0	0	0	0	0	1	1
CTNNA3	0	0	0	0	0	0	0	1	1
CTNNBIP1	0	0	0	0	0	0	0	1	1
CTNND2	0	0	0	0	0	0	1	0	1
CTSZ	0	0	0	0	0	0	1	0	1
CTTN	1	0	0	0	0	0	0	0	1
CTXN3	0	0	0	0	0	0	1	0	1
CTXND1	0	0	0	0	1	0	0	0	1
CUEDC1	0	0	0	0	0	0	0	1	1
CUEDC2	0	0	0	0	0	0	1	0	1
CUL2	0	0	0	0	0	0	0	1	1
CUX2	0	0	0	0	0	0	0	1	1
CWF19L1	0	0	0	0	0	0	0	1	1
CXCL6	0	0	0	0	0	0	1	0	1
CXXC11	0	0	0	0	0	0	1	0	1
CYB5R3	0	0	0	0	0	0	0	1	1
CYBA	0	0	0	0	0	0	1	0	1
CYP11A1	0	0	0	0	0	0	0	1	1
CYP26C1	0	0	0	0	0	0	0	1	1
CYP27B1	0	0	0	0	0	0	1	0	1
CYP2C18	0	0	0	0	0	0	1	0	1
CYP4F22	0	0	0	0	0	0	1	0	1
CYTH3	0	0	0	0	0	0	1	0	1
CYTIP	0	0	0	0	0	0	1	0	1
DACH1	0	0	0	0	0	0	0	1	1
DAOA	1	0	0	0	0	0	0	0	1
DAP3P1	0	0	0	0	0	0	0	1	1
DAPL1	0	0	0	0	0	0	1	0	1
DAZAP1	0	0	0	0	0	0	0	1	1
DCC	1	0	0	0	0	0	0	0	1
DCHS2	1	0	0	0	0	0	0	0	1
DCLRE1A	0	0	0	0	0	0	1	0	1
DCN	0	0	0	0	0	0	1	0	1
DCT	1	0	0	0	0	0	0	0	1
DCTD	1	0	0	0	0	0	0	0	1
DCTN1	0	0	0	0	0	0	1	0	1
DDB1	0	0	0	0	0	0	0	1	1
DDC	0	1	0	0	0	0	0	0	1
DDIT4	1	0	0	0	0	0	0	0	1
DDRGK1	0	0	0	0	0	0	0	1	1
DDX20	1	0	0	0	0	0	0	0	1
DDX39A	0	0	0	0	0	0	0	1	1
DDX39B	0	0	0	0	0	0	0	1	1
DEAF1	0	0	0	0	0	0	0	1	1
DEF8	0	0	0	0	0	0	0	1	1
DEFB126	0	0	0	0	0	0	1	0	1
DEGS1	0	0	0	0	0	0	0	1	1
DENND2A	0	0	0	0	0	0	1	0	1
DGKA	0	0	0	0	0	0	1	0	1
DGKB	1	0	0	0	0	0	0	0	1
DGKI	0	0	0	0	0	0	1	0	1
DHRS3	0	0	0	0	0	0	0	1	1
DHRS9	0	0	0	0	0	0	1	0	1
DHTKD1	0	0	0	0	1	0	0	0	1
DHX15	1	0	0	0	0	0	0	0	1
DIP2C	0	0	0	0	1	0	0	0	1
DISP2	0	0	0	0	0	0	0	1	1
DKFZP434A062	0	0	0	0	0	0	0	1	1
DLL4	1	0	0	0	0	0	0	0	1
DLX6-AS1	0	0	0	0	0	0	1	0	1
DMGDH	0	0	0	0	0	0	0	1	1
DMTN	0	0	0	0	0	0	0	1	1
DNAH10	0	0	0	0	0	0	0	1	1
DNAH14	1	0	0	0	0	0	0	0	1
DNAH17	0	0	0	0	0	0	1	0	1
DNAH2	1	0	0	0	0	0	0	0	1
DNAH9	0	0	0	0	0	0	0	1	1
DNAJA3	0	0	0	0	0	0	0	1	1
DNAJB1	0	0	0	0	0	0	0	1	1
DNAJB4	0	0	0	0	0	0	1	0	1
DNER	1	0	0	0	0	0	0	0	1
DNMT3B	0	0	1	0	0	0	0	0	1
DNTTIP1	0	0	0	0	1	0	0	0	1
DOK1	0	0	1	0	0	0	0	0	1
DOK6	0	0	0	0	0	0	0	1	1
DOK7	0	0	0	0	0	0	0	1	1
DOT1L	0	0	0	0	0	0	0	1	1
DPEP2	0	0	0	0	0	0	1	0	1
DPF2	0	0	0	0	0	0	0	1	1
DPH6	0	0	0	0	1	0	0	0	1
DPH7	0	0	0	0	0	0	0	1	1
DPP10	0	0	0	0	1	0	0	0	1
DPP10-AS3	0	0	0	0	1	0	0	0	1
DPPA4	0	0	0	0	0	0	0	1	1
DPY19L3	0	0	0	0	0	0	0	1	1
DRAIC	0	0	0	0	0	0	0	1	1
DRAXIN	1	0	0	0	0	0	0	0	1
DRD3	0	0	0	0	0	0	1	0	1
DRD4	0	0	1	0	0	0	0	0	1
DSC1	0	0	0	0	0	0	1	0	1
DSCAML1	0	0	0	0	0	0	1	0	1
DST	0	0	0	0	0	0	1	0	1
DUOX2	0	0	0	0	0	0	0	1	1
DUSP14	0	0	0	0	0	0	0	1	1
DYNLRB2	1	0	0	0	0	0	0	0	1
DYRK1A	1	0	0	0	0	0	0	0	1
DYSF	0	0	0	0	0	0	1	0	1
E4F1	0	0	0	0	0	0	0	1	1
ECE1	0	0	0	0	0	0	1	0	1
ECHDC2	0	0	0	0	0	0	0	1	1
EDA	0	0	0	0	1	0	0	0	1
EDAR	0	0	0	0	0	0	0	1	1
EDARADD	0	0	1	0	0	0	0	0	1
EFHC1	0	0	0	0	0	0	0	1	1
EFHD1	0	0	0	0	0	0	0	1	1
EFNA2	0	0	0	0	0	0	0	1	1
EGLN2	0	0	0	0	0	0	1	0	1
EGLN3	1	0	0	0	0	0	0	0	1
EIF3D	0	0	0	0	0	0	0	1	1
EIF3G	0	0	0	0	0	0	0	1	1
EIF4EBP1	0	0	0	0	0	0	0	1	1
EIF5	0	0	0	0	0	1	0	0	1
ELAC2	1	0	0	0	0	0	0	0	1
ELANE	0	0	1	0	0	0	0	0	1
ELAVL3	0	0	0	0	0	0	1	0	1
ELL	0	0	0	0	0	0	0	1	1
ELOA2	0	0	0	0	1	0	0	0	1
EMCN	0	0	0	0	0	0	1	0	1
EMP1	0	0	0	0	0	0	0	1	1
EMSY	0	0	0	0	1	0	0	0	1
EN1	0	0	0	0	0	0	0	1	1
ENO2	0	0	0	0	0	0	0	1	1
ENO3	0	0	0	0	0	0	1	0	1
ENOX1	0	0	0	0	0	0	0	1	1
ENPP6	1	0	0	0	0	0	0	0	1
ENSG00000272333	1	0	0	0	0	0	0	0	1
ENTPD2	0	0	0	0	0	0	0	1	1
ENTPD5	0	0	0	0	0	0	0	1	1
EOGT	0	0	0	0	0	0	0	1	1
EP400	0	0	0	0	0	0	0	1	1
EPB41L1	0	0	0	0	0	0	0	1	1
EPB41L4A-AS1	0	0	0	0	0	0	1	0	1
EPCAM	0	0	0	0	0	0	0	1	1
EPHA4	1	0	0	0	0	0	0	0	1
EPHA8	0	0	0	0	0	0	1	0	1
EPHB2	0	0	0	0	0	0	1	0	1
EPS8L2	0	0	0	0	0	0	0	1	1
ERBB4	0	0	0	0	1	0	0	0	1
ERICH1-AS1	0	0	0	0	0	0	1	0	1
ERMARD	1	0	0	0	0	0	0	0	1
ESAM	0	0	0	0	0	0	1	0	1
ESCO1	0	0	0	0	0	0	0	1	1
ESPN	0	0	0	0	0	0	1	0	1
ESPNP	0	0	0	0	0	0	0	1	1
ESR2	0	0	0	0	0	0	0	1	1
ESRRG	1	0	0	0	0	0	0	0	1
ETFB	0	0	0	0	0	0	1	0	1
ETFRF1	0	0	0	0	0	0	0	1	1
ETV1	1	0	0	0	0	0	0	0	1
ETV7	0	0	0	0	0	0	0	1	1
EVI5L	0	0	0	0	0	0	0	1	1
EVX1-AS	0	0	0	0	0	0	1	0	1
EXOC3	1	0	0	0	0	0	0	0	1
EYA2	1	0	0	0	0	0	0	0	1
FABP5	1	0	0	0	0	0	0	0	1
FAM105B	1	0	0	0	0	0	0	0	1
FAM120AOS	0	0	0	0	0	0	0	1	1
FAM131A	0	0	0	0	0	0	1	0	1
FAM135A	0	0	0	0	0	0	0	1	1
FAM163A	0	0	0	0	0	0	1	0	1
FAM168B	0	0	0	0	0	0	0	1	1
FAM171A2	0	0	0	0	0	0	0	1	1
FAM177B	0	0	0	0	0	0	1	0	1
FAM178A	1	0	0	0	0	0	0	0	1
FAM180A	0	0	0	0	0	0	1	0	1
FAM180B	0	0	0	0	0	0	0	1	1
FAM189B	0	0	0	0	0	0	0	1	1
FAM193A	0	0	0	0	0	0	0	1	1
FAM19A5	0	0	0	0	0	0	1	0	1
FAM20C	0	0	0	0	0	0	0	1	1
FAM216A	0	0	0	0	0	0	0	1	1
FAM222B	0	0	0	0	0	0	0	1	1
FAM234A	0	0	0	0	0	0	0	1	1
FAM53A	1	0	0	0	0	0	0	0	1
FAM53B	0	0	0	0	0	0	0	1	1
FAM71C	1	0	0	0	0	0	0	0	1
FAM86A	1	0	0	0	0	0	0	0	1
FAM86B2	0	0	1	0	0	0	0	0	1
FAM86C2P	0	0	1	0	0	0	0	0	1
FANCA	0	0	0	0	0	0	0	1	1
FANCD2OS	0	0	0	0	0	0	1	0	1
FAT1	1	0	0	0	0	0	0	0	1
FBLN7	0	0	0	0	0	0	0	1	1
FBXL16	0	0	0	0	0	0	0	1	1
FBXL22	0	0	0	0	0	0	1	0	1
FBXO15	1	0	0	0	0	0	0	0	1
FBXO21	0	0	0	0	0	0	0	1	1
FBXO44	1	0	0	0	0	0	0	0	1
FCGRT	0	0	0	0	0	0	0	1	1
FCRL1	0	0	0	0	0	1	0	0	1
FCRLB	0	0	0	0	0	0	0	1	1
FDFT1	0	0	0	0	0	0	0	1	1
FDPS	0	0	0	0	0	1	0	0	1
FENDRR	0	0	0	0	0	0	0	1	1
FEV	0	0	0	0	0	0	1	0	1
FGD4	0	0	0	0	1	0	0	0	1
FGFR3	0	0	0	0	0	0	1	0	1
FGL2	0	0	0	0	0	0	1	0	1
FGR	0	0	0	0	0	0	0	1	1
FHIT	0	0	0	0	0	0	0	1	1
FIBCD1	1	0	0	0	0	0	0	0	1
FLI1	0	0	0	0	0	0	1	0	1
FLOT1	0	0	0	0	0	0	1	0	1
FLT1	0	0	0	0	0	0	1	0	1
FMO2	0	0	0	0	0	0	1	0	1
FN3K	0	0	0	0	0	0	0	1	1
FNIP1	0	0	0	0	0	0	0	1	1
FOXA1	1	0	0	0	0	0	0	0	1
FOXB1	1	0	0	0	0	0	0	0	1
FOXC1	1	0	0	0	0	0	0	0	1
FOXG1	1	0	0	0	0	0	0	0	1
FOXP1	0	0	0	0	0	0	0	1	1
FOXR1	0	0	0	0	0	0	0	1	1
FOXRED2	0	0	0	0	0	0	0	1	1
FPGT-TNNI3K	0	0	0	0	0	0	0	1	1
FPR2	0	0	0	0	0	0	1	0	1
FRG1	0	0	0	0	0	0	1	0	1
FRG1DP	0	0	0	0	0	0	0	1	1
FRYL	0	0	0	0	0	0	0	1	1
FSCN	0	0	0	1	0	0	0	0	1
FSD1	0	0	0	0	0	0	1	0	1
FSHR	0	0	0	0	0	0	1	0	1
FSTL5	0	0	0	0	0	0	0	1	1
FTCD	0	0	0	0	0	0	0	1	1
FUS	0	0	0	0	0	0	0	1	1
FXYD6	0	0	1	0	0	0	0	0	1
FZD10	0	0	0	0	0	0	0	1	1
FZD9	0	0	0	0	0	0	1	0	1
G6PD	0	0	0	0	0	0	0	1	1
GAB2	0	0	0	0	0	0	0	1	1
GAB4	0	0	0	0	0	0	1	0	1
GABRG3	0	1	0	0	0	0	0	0	1
GADL1	1	0	0	0	0	0	0	0	1
GALM	1	0	0	0	0	0	0	0	1
GALNS	0	0	0	0	0	0	0	1	1
GALNT17	0	0	0	0	0	0	0	1	1
GALNT3	1	0	0	0	0	0	0	0	1
GALNTL6	0	0	0	0	0	0	0	1	1
GALR2	0	0	0	0	0	0	1	0	1
GANAB	0	0	0	0	0	0	1	0	1
GAREM2	0	0	0	0	0	0	0	1	1
GATA3	1	0	0	0	0	0	0	0	1
GATA4	0	0	0	0	0	0	1	0	1
GATA5	1	0	0	0	0	0	0	0	1
GATAD2B	0	0	0	0	0	0	0	1	1
GCA	1	0	0	0	0	0	0	0	1
GCSAML	0	0	0	0	0	0	1	0	1
GDI2	0	0	0	0	0	0	0	1	1
GDPD1	0	0	0	0	0	0	0	1	1
GDPD5	1	0	0	0	0	0	0	0	1
GFI1B	0	0	0	0	1	0	0	0	1
GFRA1	1	0	0	0	0	0	0	0	1
GFRA3	0	0	0	0	0	0	1	0	1
GFRA4	0	0	0	0	0	0	1	0	1
GFY	1	0	0	0	0	0	0	0	1
GIPR	0	0	0	0	0	0	1	0	1
GIT2	0	0	0	0	0	0	1	0	1
GJA4	0	0	0	0	0	0	1	0	1
GJB6	0	0	0	0	0	0	1	0	1
GKN2	1	0	0	0	0	0	0	0	1
GLP2R	0	0	0	0	0	0	1	0	1
GLT1D1	1	0	0	0	0	0	0	0	1
GLTPD2	0	0	0	0	0	1	0	0	1
GMDS	1	0	0	0	0	0	0	0	1
GNA12	0	0	0	0	0	1	0	0	1
GNA14	0	0	0	0	1	0	0	0	1
GNA14-AS1	0	0	0	0	1	0	0	0	1
GNAI1	0	0	0	0	0	0	0	1	1
GNAO1	0	0	0	0	0	0	1	0	1
GNAS	0	1	0	0	0	0	0	0	1
GNL1	0	0	0	0	0	0	1	0	1
GPHN	0	0	0	0	0	1	0	0	1
GPM6A	0	0	0	0	0	0	0	1	1
GPR1	0	1	0	0	0	0	0	0	1
GPR133	0	0	0	0	0	1	0	0	1
GPR139	1	0	0	0	0	0	0	0	1
GPR141	0	0	0	0	0	0	0	1	1
GPR144	1	0	0	0	0	0	0	0	1
GPR65	1	0	0	0	0	0	0	0	1
GPR68	0	0	0	0	0	0	1	0	1
GPRC5B	1	0	0	0	0	0	0	0	1
GPX6	0	0	0	0	0	0	1	0	1
GRB7	0	0	1	0	0	0	0	0	1
GRHL3	0	0	0	0	0	0	1	0	1
GRID2IP	0	0	0	0	1	0	0	0	1
GRIK1	1	0	0	0	0	0	0	0	1
GRIK3	0	0	0	0	0	0	0	1	1
GRIK5	0	0	0	0	0	0	0	1	1
GRIP1	1	0	0	0	0	0	0	0	1
GRM3	0	0	0	0	0	0	0	1	1
GRM7-AS3	0	0	0	0	0	0	0	1	1
GRPEL1	0	0	0	0	0	0	0	1	1
GSE1	0	0	0	0	0	0	0	1	1
GSG1L	0	0	0	0	0	0	1	0	1
GSN	0	0	0	0	0	0	0	1	1
GSTP1	0	0	0	0	0	0	1	0	1
GTDC1	1	0	0	0	0	0	0	0	1
GTF2F2	0	0	0	0	0	0	0	1	1
GTF3C1	0	0	0	0	0	0	0	1	1
GTF3C2	0	0	0	0	0	0	0	1	1
GTF3C4	1	0	0	0	0	0	0	0	1
GTPBP2	0	0	0	0	0	0	0	1	1
GYPC	0	0	0	0	0	0	0	1	1
GYS2	0	0	0	0	0	0	1	0	1
H19	0	1	0	0	0	0	0	0	1
H3-3A	0	0	0	0	0	0	0	1	1
H6PD	0	0	0	0	0	1	0	0	1
HACD1	0	0	0	0	0	0	0	1	1
HACD3	0	0	0	0	0	0	0	1	1
HAGH	0	0	0	0	0	0	0	1	1
HAGHL	1	0	0	0	0	0	0	0	1
HAND2	1	0	0	0	0	0	0	0	1
HAND2-AS1	0	0	0	0	0	0	1	0	1
HCG27	0	0	0	0	0	0	0	1	1
HCN1	0	0	0	0	0	0	0	1	1
HDAC1	1	0	0	0	0	0	0	0	1
HDLBP	0	0	0	0	0	0	1	0	1
HEATR6	1	0	0	0	0	0	0	0	1
HERPUD2	0	0	0	0	0	0	1	0	1
HGF	1	0	0	0	0	0	0	0	1
HHATL	0	0	0	0	0	0	1	0	1
HHIPL2	0	0	0	0	0	0	1	0	1
HIBADH	1	0	0	0	0	0	0	0	1
HIST1H2BPS3	0	0	0	0	0	0	1	0	1
HIST1H4H	0	0	0	0	0	0	1	0	1
HLA-DRA	0	0	0	0	0	0	1	0	1
HLA-E	0	0	0	0	0	0	1	0	1
HLX	0	0	0	0	0	1	0	0	1
HMGCS2	0	0	0	0	0	0	1	0	1
HMHA1	0	0	0	0	0	0	1	0	1
HNRNPDLP1	0	0	0	0	1	0	0	0	1
HNRNPFP1	0	0	0	0	0	0	1	0	1
HNRNPL	0	0	0	0	0	0	0	1	1
HNRNPUL2	0	0	0	0	0	0	0	1	1
HNRNPUL2-BSCL2	0	0	0	0	0	0	0	1	1
HOMER3	0	0	0	0	0	0	1	0	1
HOOK2	0	0	0	0	0	0	0	1	1
HOTAIR	0	0	0	0	0	0	0	1	1
HOTTIP	0	0	0	0	0	0	1	0	1
HOXA10-AS	0	0	0	0	0	0	1	0	1
HOXA11-AS	0	0	0	0	0	0	1	0	1
HOXA3	0	1	0	0	0	0	0	0	1
HOXB-AS1	0	0	0	0	0	0	1	0	1
HOXB-AS3	0	0	0	0	0	0	1	0	1
HOXB-AS4	0	0	0	0	0	0	1	0	1
HOXB5	1	0	0	0	0	0	0	0	1
HOXB7	0	0	0	0	0	0	0	1	1
HOXB9	0	0	0	0	0	0	0	1	1
HOXC10	1	0	0	0	0	0	0	0	1
HOXC11	1	0	0	0	0	0	0	0	1
HOXC12	1	0	0	0	0	0	0	0	1
HOXC6	0	0	0	0	0	0	1	0	1
HOXC8	0	0	0	0	0	0	1	0	1
HOXD11	0	0	0	0	0	0	1	0	1
HR	1	0	0	0	0	0	0	0	1
HRH2	1	0	0	0	0	0	0	0	1
HRH3	0	0	0	0	0	0	0	1	1
HRK	0	0	0	0	0	0	1	0	1
HS1BP3	0	0	0	0	0	0	0	1	1
HS3ST3A1	1	0	0	0	0	0	0	0	1
HS3ST4	1	0	0	0	0	0	0	0	1
HSBP1	1	0	0	0	0	0	0	0	1
HSD17B8	0	0	0	0	0	0	1	0	1
HSDL1	0	0	0	0	0	0	0	1	1
HSF2BP	0	0	0	0	0	0	0	1	1
HSPA1L	0	0	0	0	0	0	1	0	1
HSPA4L	0	0	0	0	0	0	0	1	1
HSPB11	0	0	0	0	0	0	0	1	1
HSPD1	0	0	0	0	0	0	0	1	1
HSPE1	0	0	0	0	0	0	0	1	1
HSPE1-MOB4	0	0	0	0	0	0	0	1	1
HTR2A	0	0	0	0	0	0	1	0	1
ICMT	0	0	0	0	0	0	0	1	1
ID3	0	0	0	0	0	0	1	0	1
IDH3A	0	0	0	0	0	0	1	0	1
IFI30	0	0	0	0	0	0	1	0	1
IFI35	0	0	0	0	0	0	1	0	1
IFIT3	0	0	0	0	0	0	1	0	1
IFITM1	0	0	0	0	0	0	1	0	1
IFITM2	0	0	0	0	0	0	1	0	1
IFITM3	0	0	0	0	0	0	1	0	1
IFLTD1	0	0	0	0	0	0	1	0	1
IFNG	0	0	0	0	0	0	1	0	1
IFRD2	0	0	0	0	0	0	0	1	1
IGF1R	1	0	0	0	0	0	0	0	1
IGF2BP3	0	0	0	0	1	0	0	0	1
IGF2R	0	1	0	0	0	0	0	0	1
IGFLR1	1	0	0	0	0	0	0	0	1
IGHMBP2	0	0	0	0	1	0	0	0	1
IHH	0	0	0	0	0	0	1	0	1
IKBKG	0	0	0	0	0	0	0	1	1
IL11	0	0	0	0	0	0	1	0	1
IL17RB	0	0	0	0	0	0	0	1	1
IL18RAP	0	0	0	0	0	0	1	0	1
IL1R2	0	0	0	0	0	0	1	0	1
IL1RAPL1	0	0	0	0	0	0	0	1	1
ILF3-DT	0	0	0	0	0	0	0	1	1
IMPDH1	0	0	0	0	0	0	0	1	1
ING5	0	0	0	0	0	0	1	0	1
INHBA	1	0	0	0	0	0	0	0	1
INHBB	0	0	0	0	0	0	0	1	1
INMT-MINDY4	0	0	0	0	0	0	0	1	1
INO80	0	0	0	0	0	0	0	1	1
INPP5J	0	0	0	0	0	0	1	0	1
INPPL1	0	0	0	0	0	0	0	1	1
INTS1	0	0	0	0	0	0	1	0	1
IRF3	0	0	0	0	0	0	0	1	1
IRF9	0	0	0	0	0	0	1	0	1
IRGQ	0	0	0	0	0	0	0	1	1
IRS2	1	0	0	0	0	0	0	0	1
IRS4	0	0	1	0	0	0	0	0	1
IRX1	0	0	0	0	0	0	1	0	1
IRX4	0	0	0	0	0	0	0	1	1
IRX6	0	0	0	0	0	0	1	0	1
ISG20L2	0	0	0	0	0	0	1	0	1
ISLR2	0	0	0	0	0	0	1	0	1
ITCH	0	0	0	0	0	0	0	1	1
ITGA11	0	0	0	0	0	0	1	0	1
ITGB6	1	0	0	0	0	0	0	0	1
ITIH2	0	0	0	0	0	0	1	0	1
ITPK1	0	0	0	0	0	0	0	1	1
ITPKB	0	0	0	0	0	0	0	1	1
JAK3	0	0	0	0	0	0	1	0	1
JAKMIP2	0	0	0	0	0	0	1	0	1
JAKMIP3	0	0	0	0	0	0	0	1	1
JPH3	0	0	0	0	0	0	0	1	1
KAT5	0	0	0	0	0	0	0	1	1
KATNAL2	0	0	0	0	1	0	0	0	1
KATNBL1	0	0	0	0	0	0	1	0	1
KBTBD11	0	0	0	0	0	0	0	1	1
KBTBD11-OT1	0	0	0	0	0	0	0	1	1
KCMF1	0	0	0	0	0	0	0	1	1
KCNAB2	0	0	0	0	0	0	1	0	1
KCND3	1	0	0	0	0	0	0	0	1
KCNF1	0	0	1	0	0	0	0	0	1
KCNG1	1	0	0	0	0	0	0	0	1
KCNH2	0	0	0	0	0	0	0	1	1
KCNH4	0	0	0	0	0	0	1	0	1
KCNH5	1	0	0	0	0	0	0	0	1
KCNH6	0	0	0	0	0	0	0	1	1
KCNH7	1	0	0	0	0	0	0	0	1
KCNIP1	0	0	0	0	0	0	0	1	1
KCNJ11	0	0	0	0	0	0	0	1	1
KCNJ14	0	0	0	0	0	0	1	0	1
KCNJ15	0	0	0	0	0	0	1	0	1
KCNJ6	1	0	0	0	0	0	0	0	1
KCNK10	1	0	0	0	0	0	0	0	1
KCNK2	0	0	0	0	0	0	1	0	1
KCNK4-TEX40	0	0	0	0	0	0	0	1	1
KCNK6	0	0	0	0	0	0	0	1	1
KCNN1	0	0	0	0	0	0	0	1	1
KCNN3	0	0	0	0	0	0	1	0	1
KCNT1	0	0	0	0	0	0	0	1	1
KCNU1	1	0	0	0	0	0	0	0	1
KCTD13	0	0	0	0	0	0	0	1	1
KDM8	1	0	0	0	0	0	0	0	1
KEAP1	0	0	0	0	0	0	0	1	1
KHDC1L	0	0	0	0	0	0	1	0	1
KHDC3L	0	0	0	0	0	0	1	0	1
KHDRBS3	1	0	0	0	0	0	0	0	1
KHNYN	0	0	0	0	0	0	0	1	1
KIAA0947	1	0	0	0	0	0	0	0	1
KIAA1217	1	0	0	0	0	0	0	0	1
KIAA1522	0	0	0	0	0	0	1	0	1
KIAA1549	0	0	0	0	0	0	1	0	1
KIF17	0	0	0	0	0	0	0	1	1
KIF18A	0	0	0	0	0	0	0	1	1
KIF21A	1	0	0	0	0	0	0	0	1
KIF26A	0	0	0	0	0	0	0	1	1
KIF3C	0	0	0	0	0	0	0	1	1
KIFC3	0	0	0	0	0	0	0	1	1
KLC1	0	0	0	0	0	0	0	1	1
KLF11	0	0	0	0	0	0	0	1	1
KLF14	1	0	0	0	0	0	0	0	1
KLF15	0	0	0	0	0	0	0	1	1
KLF16	0	0	0	0	0	0	0	1	1
KLF2-DT	0	0	0	0	0	0	0	1	1
KLF6	1	0	0	0	0	0	0	0	1
KLHDC7B	1	0	0	0	0	0	0	0	1
KLHL11	0	0	0	0	0	0	0	1	1
KLHL23	0	0	0	0	0	0	0	1	1
KLHL25	1	0	0	0	0	0	0	0	1
KLHL35	1	0	0	0	0	0	0	0	1
KLHL40	0	0	0	0	0	0	1	0	1
KLHL6	0	0	0	0	0	0	1	0	1
KLK10	0	0	0	0	0	0	1	0	1
KLK5	0	0	0	0	0	0	0	1	1
KMT2B	0	0	0	0	0	0	0	1	1
KNDC1	0	0	0	0	0	0	1	0	1
KNOP1P5	0	0	0	0	1	0	0	0	1
KRT12	1	0	0	0	0	0	0	0	1
KRT20	1	0	0	0	0	0	0	0	1
KRT25	0	0	0	0	0	0	1	0	1
KRT7	0	0	1	0	0	0	0	0	1
KRT8	0	0	0	0	0	0	0	1	1
KRTAP13-4	0	0	0	0	0	0	1	0	1
KRTAP2-1	0	0	0	0	0	0	1	0	1
KRTAP20-3	0	0	0	0	0	0	1	0	1
KRTAP23-1	0	0	0	0	0	0	1	0	1
KRTAP25-1	0	0	0	0	0	0	1	0	1
KRTAP5-11	0	0	0	0	0	0	0	1	1
KRTAP6-2	0	0	0	0	0	0	1	0	1
KSR1	0	0	0	0	0	0	0	1	1
LAIR1	0	0	0	0	1	0	0	0	1
LAMA5	0	0	0	0	0	0	1	0	1
LAMB1	1	0	0	0	0	0	0	0	1
LAMB4	1	0	0	0	0	0	0	0	1
LAMP1	0	0	0	0	0	0	0	1	1
LAMP5	1	0	0	0	0	0	0	0	1
LBX1	1	0	0	0	0	0	0	0	1
LBX1-AS1	0	0	0	0	0	0	1	0	1
LCE3E	0	0	0	0	0	0	1	0	1
LDB2	1	0	0	0	0	0	0	0	1
LEAP2	0	0	0	0	0	0	1	0	1
LEMD2	0	0	1	0	0	0	0	0	1
LENG1	0	0	0	0	0	0	0	1	1
LEPR	0	0	0	0	0	0	0	1	1
LFNG	0	0	1	0	0	0	0	0	1
LGR6	0	0	0	0	0	0	1	0	1
LHB	0	0	0	0	0	0	1	0	1
LHX2	0	0	0	0	0	0	1	0	1
LHX5	0	0	0	0	0	0	1	0	1
LHX6	0	0	0	0	0	0	1	0	1
LHX8	0	0	0	0	0	0	1	0	1
LILRB4	0	1	0	0	0	0	0	0	1
LIMK2	0	0	0	0	0	0	0	1	1
LIMS2	0	0	0	0	0	0	1	0	1
LINC00162	0	0	0	0	0	0	1	0	1
LINC00304	0	0	0	0	0	0	1	0	1
LINC00305	0	0	0	0	0	0	1	0	1
LINC00320	0	0	0	0	0	0	1	0	1
LINC00478	0	0	0	0	0	0	1	0	1
LINC00620	0	0	0	0	0	0	0	1	1
LINC00636	0	0	0	0	0	0	1	0	1
LINC00658	0	0	0	0	0	0	0	1	1
LINC00861	0	0	0	0	1	0	0	0	1
LINC00929	0	0	0	0	0	0	1	0	1
LINC00963	0	0	0	0	0	0	0	1	1
LINC00971	0	0	0	0	0	0	0	1	1
LINC00982	0	0	0	0	0	0	1	0	1
LINC01007	0	0	0	0	0	0	1	0	1
LINC01044	0	0	0	0	0	0	0	1	1
LINC01090	0	0	0	0	1	0	0	0	1
LINC01141	0	0	0	0	0	0	0	1	1
LINC01208	0	0	0	0	0	0	0	1	1
LINC01234	0	0	0	0	0	0	0	1	1
LINC01305	0	0	0	0	0	0	0	1	1
LINC01320	0	0	0	0	0	0	0	1	1
LINC01435	0	0	0	0	0	0	0	1	1
LINC01470	0	0	0	0	1	0	0	0	1
LINC01478	0	0	0	0	0	0	0	1	1
LINC01586	0	0	0	0	1	0	0	0	1
LINC01609	0	0	0	0	0	0	0	1	1
LINC01857	0	0	0	0	0	0	0	1	1
LINC01962	0	0	0	0	0	0	0	1	1
LINC02055	0	0	0	0	1	0	0	0	1
LINC02241	0	0	0	0	0	0	0	1	1
LINC02307	0	0	0	0	0	0	0	1	1
LINC02323	0	0	0	0	0	0	0	1	1
LINC02336	0	0	0	0	0	0	0	1	1
LINC02356	0	0	0	0	0	0	0	1	1
LINGO2	0	0	0	0	0	0	0	1	1
LMAN2L	0	0	0	0	0	0	0	1	1
LMBRD1	0	0	0	0	0	0	0	1	1
LMCD1-AS1	0	0	0	0	1	0	0	0	1
LMX1A	1	0	0	0	0	0	0	0	1
LOC134368	0	0	1	0	0	0	0	0	1
LOC154449	0	0	1	0	0	0	0	0	1
LOC653566	0	0	1	0	0	0	0	0	1
LPIN1	0	0	0	0	0	0	0	1	1
LPP	0	0	0	0	0	0	1	0	1
LRIG2	0	0	0	0	0	0	0	1	1
LRP1	0	1	0	0	0	0	0	0	1
LRP1B	0	0	0	0	0	0	0	1	1
LRP4-AS1	0	0	0	0	0	0	0	1	1
LRRC30	0	0	0	0	0	0	1	0	1
LRRC37A4P	0	0	0	0	0	0	0	1	1
LRRC3B	1	0	0	0	0	0	0	0	1
LRRC47	0	0	0	0	0	0	0	1	1
LRRTM4	0	0	0	0	0	0	0	1	1
LRWD1	0	0	0	0	1	0	0	0	1
LSM14B	0	0	0	0	0	0	0	1	1
LSMEM1	0	0	0	0	0	0	1	0	1
LTBP3	0	0	0	0	0	1	0	0	1
LY6E-DT	0	0	0	0	0	0	0	1	1
LY6G5C	0	0	0	0	0	0	1	0	1
LYL1	0	0	0	0	0	0	1	0	1
LZTS3	0	0	0	0	0	0	1	0	1
MAD1L1	0	0	0	0	0	0	0	1	1
MAF	1	0	0	0	0	0	0	0	1
MAFB	1	0	0	0	0	0	0	0	1
MAGI2	0	1	0	0	0	0	0	0	1
MAGOH	0	0	0	0	0	0	0	1	1
MALL	0	0	0	0	0	0	1	0	1
MAN2A2	0	0	0	0	0	0	1	0	1
MANEA	0	0	0	0	0	0	0	1	1
MAP2	0	0	0	0	0	0	0	1	1
MAP2K7	0	0	0	0	0	0	0	1	1
MAP3K11	0	0	0	0	0	0	0	1	1
MAP3K20	0	0	0	0	0	0	0	1	1
MAP3K20-AS1	0	0	0	0	0	0	0	1	1
MAP4K1	0	0	1	0	0	0	0	0	1
MAPK12	0	0	0	0	0	0	0	1	1
MAPK4	0	0	0	0	0	0	0	1	1
MARK4	0	0	0	0	0	0	0	1	1
MAST1	0	0	0	0	0	0	1	0	1
MAST4	1	0	0	0	0	0	0	0	1
MAU2	0	0	0	0	0	0	0	1	1
MAVS	0	0	0	0	0	0	0	1	1
MB	0	0	0	0	0	0	1	0	1
MBD3	0	0	0	0	0	0	0	1	1
MBIP	1	0	0	0	0	0	0	0	1
MCAM	0	0	0	0	0	0	0	1	1
MCF2L	0	0	0	0	0	0	1	0	1
MCM2	0	0	0	0	0	0	0	1	1
MCM5	0	0	0	0	0	0	0	1	1
MCTP1	0	0	0	0	0	0	0	1	1
MDGA2	0	0	0	0	0	0	0	1	1
MDM4	0	0	0	0	0	0	0	1	1
MEF2C	0	0	0	0	0	0	0	1	1
MEIS2	0	0	0	0	0	0	1	0	1
METTL21A	0	0	0	0	0	0	0	1	1
METTL27	0	0	0	0	0	0	0	1	1
METTL8	0	0	0	0	0	0	0	1	1
MEX3C	1	0	0	0	0	0	0	0	1
MFNG	0	0	0	0	0	0	0	1	1
MFSD1	0	0	0	0	0	0	0	1	1
MFSD12	0	0	0	0	0	0	0	1	1
MFSD4	0	0	0	0	0	0	1	0	1
MFSD7	0	0	0	0	0	0	1	0	1
MGAT4C	0	0	0	0	0	0	1	0	1
MICALL2	1	0	0	0	0	0	0	0	1
MIDEAS	0	0	0	0	0	0	0	1	1
MIR1180	0	0	0	0	0	0	1	0	1
MIR1471	0	0	0	0	1	0	0	0	1
MIR181A1	0	0	0	0	0	0	1	0	1
MIR216A	0	0	0	0	0	0	1	0	1
MIR23AHG	0	0	0	0	0	0	0	1	1
MIR345	0	0	0	0	0	0	1	0	1
MIR3667HG	0	0	0	0	0	0	0	1	1
MIR4666A	0	0	0	0	0	0	1	0	1
MIR5095	0	0	0	0	0	1	0	0	1
MIR568	0	0	0	0	0	0	1	0	1
MIR5699	0	0	0	0	0	0	1	0	1
MIR647	0	0	0	0	0	0	1	0	1
MIR939	0	0	0	0	0	0	0	1	1
MKKS	1	0	0	0	0	0	0	0	1
MKLN1	1	0	0	0	0	0	0	0	1
MKNK2	0	0	0	0	0	0	0	1	1
MLIP	1	0	0	0	0	0	0	0	1
MLXIP	1	0	0	0	0	0	0	0	1
MMRN1	1	0	0	0	0	0	0	0	1
MNS1	0	0	0	0	0	0	0	1	1
MNX1	0	0	0	0	0	0	0	1	1
MOB3A	0	0	0	0	0	0	0	1	1
MOGAT3	0	0	0	0	0	0	1	0	1
MON1A	0	0	0	0	0	1	0	0	1
MON1B	0	0	0	0	0	0	1	0	1
MORC4	0	0	0	0	1	0	0	0	1
MORF4L1	0	0	0	0	0	0	0	1	1
MPPED1	0	0	1	0	0	0	0	0	1
MRC2	0	0	0	0	1	0	0	0	1
MRGPRG-AS1	0	0	0	0	0	0	0	1	1
MRM1	1	0	0	0	0	0	0	0	1
MRM2	0	0	0	0	0	0	0	1	1
MRPL2	0	0	0	0	0	0	1	0	1
MRPS17	0	0	0	0	0	0	0	1	1
MRPS2	0	0	0	0	0	0	0	1	1
MRPS23	0	0	0	0	0	0	0	1	1
MRPS6P2	0	0	0	0	0	0	1	0	1
MS4A3	0	0	0	0	0	0	1	0	1
MSI2	1	0	0	0	0	0	0	0	1
MSR1	0	0	0	0	0	0	1	0	1
MSRB2	1	0	0	0	0	0	0	0	1
MST1L	0	0	0	0	0	0	0	1	1
MST1P2	0	0	0	0	0	0	0	1	1
MTFMT	0	0	0	0	0	0	0	1	1
MTMR11	0	0	0	0	0	0	1	0	1
MTMR6	0	0	0	0	0	0	1	0	1
MTOR	0	0	0	0	0	0	0	1	1
MTX1	1	0	0	0	0	0	0	0	1
MVB12B	1	0	0	0	0	0	0	0	1
MVP	0	0	0	0	0	0	1	0	1
MXD4	0	0	0	0	0	0	1	0	1
MXRA5	0	0	0	0	0	1	0	0	1
MYBPC1	0	0	0	0	0	0	1	0	1
MYBPC3	0	0	0	0	1	0	0	0	1
MYEOV2	0	1	0	0	0	0	0	0	1
MYH1	0	0	0	0	0	0	1	0	1
MYH11	0	0	0	0	0	0	1	0	1
MYL1	0	0	0	0	0	0	1	0	1
MYO16	0	0	0	0	0	0	1	0	1
MYO18B	0	0	0	0	1	0	0	0	1
MYO1C	0	0	0	0	0	0	1	0	1
MYO1D	0	0	0	0	0	0	1	0	1
MYO1F	0	0	0	0	0	0	1	0	1
MYO5C	0	0	0	0	0	0	0	1	1
MYO9B	0	0	0	0	0	0	0	1	1
MYOF	0	0	0	0	0	0	1	0	1
MYOM2	1	0	0	0	0	0	0	0	1
MZT1	0	0	0	0	0	0	0	1	1
MZT2B	0	0	0	0	0	0	0	1	1
N10	0	0	0	1	0	0	0	0	1
N12	0	0	0	1	0	0	0	0	1
N22	0	0	0	1	0	0	0	0	1
N23	0	0	0	1	0	0	0	0	1
N24	0	0	0	1	0	0	0	0	1
N27	0	0	0	1	0	0	0	0	1
N30	0	0	0	1	0	0	0	0	1
N4BP2L1	0	0	0	0	0	0	0	1	1
N8	0	0	0	1	0	0	0	0	1
N9	0	0	0	1	0	0	0	0	1
NAA60	0	1	0	0	0	0	0	0	1
NAALADL2	0	0	0	0	0	0	0	1	1
NACC2	0	0	0	0	0	0	0	1	1
NALCN	0	0	0	0	0	0	1	0	1
NALF1	0	0	0	0	0	0	0	1	1
NARFL	1	0	0	0	0	0	0	0	1
NAT1	0	0	0	0	0	0	1	0	1
NAT16	0	0	0	0	0	0	0	1	1
NAT8L	0	0	0	0	0	0	0	1	1
NBLA00301	0	0	1	0	0	0	0	0	1
NBPF1	1	0	0	0	0	0	0	0	1
NCAM2	0	0	0	0	1	0	0	0	1
NCAPD3	0	0	0	0	1	0	0	0	1
NCAPH	0	0	0	0	0	0	0	1	1
NCBP3	0	0	0	0	0	0	0	1	1
NCCRP1	0	0	0	0	0	0	1	0	1
NCK1	0	0	0	0	0	0	0	1	1
NCK2	0	0	0	0	0	0	1	0	1
NCKAP5L	0	0	0	0	0	0	1	0	1
NCOA5	0	0	0	0	0	0	0	1	1
NCS1	0	0	0	0	0	0	0	1	1
NDC1	0	0	0	0	0	0	0	1	1
NDUFA3	0	0	0	0	0	0	0	1	1
NDUFB2	0	0	0	0	0	0	0	1	1
NDUFB2-AS1	0	0	0	0	0	0	0	1	1
NDUFC1	0	0	0	0	0	0	0	1	1
NDUFV1	0	0	0	0	0	0	0	1	1
NECAB3	0	0	0	0	0	0	0	1	1
NECAP2	0	0	0	0	0	0	0	1	1
NEDD1	1	0	0	0	0	0	0	0	1
NEGR1	0	0	0	0	0	0	0	1	1
NEIL2	0	0	0	0	0	0	0	1	1
NEK10	1	0	0	0	0	0	0	0	1
NES	0	0	0	0	0	0	0	1	1
NETO1	1	0	0	0	0	0	0	0	1
NEURL3	0	0	0	0	0	0	0	1	1
NEUROD2	0	0	0	0	0	0	1	0	1
NFAT5	0	0	1	0	0	0	0	0	1
NFATC2	1	0	0	0	0	0	0	0	1
NFATC4	0	0	0	0	0	0	0	1	1
NFIC	0	0	0	0	0	0	1	0	1
NFKB2	0	0	0	0	0	0	0	1	1
NFU1	0	0	0	0	0	0	1	0	1
NGEF	0	0	0	0	0	0	1	0	1
NHP2P2	0	0	0	0	1	0	0	0	1
NID1	0	0	0	0	0	0	1	0	1
NINJ2-AS1	0	0	0	0	0	0	0	1	1
NIPSNAP2	0	0	0	0	0	0	0	1	1
NIT1	0	0	0	0	0	0	1	0	1
NKD2	0	0	0	0	0	0	0	1	1
NKX1-1	1	0	0	0	0	0	0	0	1
NKX2	0	0	1	0	0	0	0	0	1
NKX2-5	0	0	0	0	0	0	1	0	1
NLGN1	0	0	0	0	0	0	0	1	1
NLGN4X	0	0	0	0	0	0	0	1	1
NLRP2	0	1	0	0	0	0	0	0	1
NME5	0	0	0	0	0	0	0	1	1
NMUR1	0	0	0	0	0	0	0	1	1
NOA1	0	0	0	0	0	0	0	1	1
NOC2L	0	0	0	0	0	0	0	1	1
NOC2LP1	0	0	0	0	0	0	0	1	1
NOG	1	0	0	0	0	0	0	0	1
NOL9	0	0	0	0	0	0	0	1	1
NONE	0	0	0	1	0	0	0	0	1
NOP53	0	0	0	0	0	0	0	1	1
NOP56	0	0	0	0	0	0	0	1	1
NOS2P1	0	0	0	0	0	0	0	1	1
NOSIP	0	0	0	0	0	0	0	1	1
NOTCH4	0	0	0	0	0	1	0	0	1
NOVA1	0	0	0	0	0	0	0	1	1
NOX4	0	0	0	0	0	1	0	0	1
NOXA1	0	0	0	0	0	0	0	1	1
NPAS3	1	0	0	0	0	0	0	0	1
NPFFR1	0	0	0	0	0	0	0	1	1
NPHP4	1	0	0	0	0	0	0	0	1
NPM1	0	0	0	0	0	0	0	1	1
NPR3	1	0	0	0	0	0	0	0	1
NPTX2	0	0	0	0	0	0	0	1	1
NPW	0	0	0	0	0	0	1	0	1
NR1D2	1	0	0	0	0	0	0	0	1
NRDC	0	0	0	0	0	0	0	1	1
NRG3	0	0	0	0	1	0	0	0	1
NRP1	1	0	0	0	0	0	0	0	1
NRROS	0	0	0	0	0	0	0	1	1
NRSN1	1	0	0	0	0	0	0	0	1
NRXN2	0	0	0	0	0	0	0	1	1
NRXN3	0	0	0	0	0	0	1	0	1
NSD3	0	0	0	0	0	0	0	1	1
NT5C2	0	0	0	0	0	0	0	1	1
NTRK1	0	0	0	0	0	0	0	1	1
NUAK1	1	0	0	0	0	0	0	0	1
NUBP2	0	0	0	0	0	0	0	1	1
NUDT13	0	0	0	0	0	0	1	0	1
NUFIP2	0	0	0	0	0	0	0	1	1
NUP133	0	0	0	0	0	0	0	1	1
NUP188	0	0	0	0	0	0	0	1	1
NUP88	0	0	0	0	0	0	0	1	1
NXF1	0	0	0	0	0	0	1	0	1
NXPE2	1	0	0	0	0	0	0	0	1
OBI1-AS1	0	0	0	0	0	0	0	1	1
OBSCN	0	1	0	0	0	0	0	0	1
ODF3L2	0	0	0	0	1	0	0	0	1
OFCC1	1	0	0	0	0	0	0	0	1
ONECUT3	0	0	0	0	0	0	1	0	1
OPCML	1	0	0	0	0	0	0	0	1
OPN5	1	0	0	0	0	0	0	0	1
OPRD1	0	0	0	0	0	0	0	1	1
OR10AE3P	0	0	0	0	0	0	1	0	1
OR10D3	1	0	0	0	0	0	0	0	1
OR10G7	1	0	0	0	0	0	0	0	1
OR10S1	1	0	0	0	0	0	0	0	1
OR11A1	0	0	0	0	0	0	1	0	1
OR12D2	0	0	0	0	0	0	1	0	1
OR14J1	0	0	0	0	0	0	1	0	1
OR1E2	0	0	0	0	0	0	1	0	1
OR2G2	0	0	0	0	0	0	1	0	1
OR2H2	0	0	0	0	0	0	1	0	1
OR2W5	0	0	0	0	0	0	1	0	1
OR4D1	0	0	0	0	0	0	0	1	1
OR51Q1	0	0	0	0	0	0	1	0	1
OR51S1	0	0	0	0	0	0	1	0	1
OR52J3	1	0	0	0	0	0	0	0	1
OR5AU1	0	0	0	0	0	0	1	0	1
OR5M8	0	0	0	0	0	0	1	0	1
OR6K2	0	0	0	0	0	0	1	0	1
OR7E47P	0	0	0	0	0	0	0	1	1
OR8B8	0	0	0	0	0	0	1	0	1
ORAI1	0	0	0	0	0	0	0	1	1
OSBPL2	0	0	0	0	0	0	0	1	1
OSBPL5	0	1	0	0	0	0	0	0	1
OSR2	0	0	0	0	0	0	1	0	1
OST4	1	0	0	0	0	0	0	0	1
OSTN	0	0	0	0	0	0	0	1	1
OTOP1	1	0	0	0	0	0	0	0	1
OTUD1	1	0	0	0	0	0	0	0	1
OTX2	0	0	0	0	0	0	1	0	1
OXGR1	0	0	0	0	0	0	1	0	1
OXLD1	0	0	1	0	0	0	0	0	1
P2RY12	1	0	0	0	0	0	0	0	1
P4HA2	0	0	0	0	1	0	0	0	1
PABPC4L	1	0	0	0	0	0	0	0	1
PABPN1	0	0	0	0	0	0	0	1	1
PACRG	0	0	0	0	0	0	0	1	1
PACRGL	1	0	0	0	0	0	0	0	1
PACS2	0	0	0	0	0	0	1	0	1
PAK4	0	0	0	0	0	0	0	1	1
PALM	0	0	1	0	0	0	0	0	1
PAM	0	0	0	0	0	0	1	0	1
PARP12	0	0	1	0	0	0	0	0	1
PARP14	0	0	0	0	0	1	0	0	1
PATZ1	0	0	0	0	0	0	0	1	1
PBX3	1	0	0	0	0	0	0	0	1
PCDH18	0	0	0	0	0	0	0	1	1
PCDH9	0	0	0	0	0	0	1	0	1
PCDHGA1	0	0	0	0	0	0	1	0	1
PCNT	0	0	0	0	0	0	0	1	1
PCTP	1	0	0	0	0	0	0	0	1
PDCD6-AHRR	0	0	0	0	0	0	0	1	1
PDE1B	0	0	0	0	0	0	1	0	1
PDE4B	0	0	0	0	0	0	1	0	1
PDE4C	0	0	1	0	0	0	0	0	1
PDE4D	0	0	0	0	1	0	0	0	1
PDE7B	0	0	0	0	0	0	1	0	1
PDF	0	0	0	0	0	0	1	0	1
PDIA6	0	0	0	0	0	0	0	1	1
PDLIM4	0	0	0	0	1	0	0	0	1
PDPK1	0	0	0	0	0	0	0	1	1
PDSS1	1	0	0	0	0	0	0	0	1
PDXK	0	0	0	0	0	0	0	1	1
PDZRN4	0	0	0	0	0	0	1	0	1
PEAK3	0	0	0	0	0	0	0	1	1
PEAR1	0	0	0	0	0	0	1	0	1
PEDS1-UBE2V1	0	0	0	0	0	0	0	1	1
PEG3	0	1	0	0	0	0	0	0	1
PELI2	1	0	0	0	0	0	0	0	1
PEPD	1	0	0	0	0	0	0	0	1
PEX10	0	1	0	0	0	0	0	0	1
PEX6	0	0	0	0	0	0	0	1	1
PFDN5	0	0	0	0	0	0	0	1	1
PFKFB3	0	0	0	0	0	1	0	0	1
PFKL	0	0	0	0	0	0	0	1	1
PFKP	1	0	0	0	0	0	0	0	1
PFN2	1	0	0	0	0	0	0	0	1
PGAP6	0	0	0	0	0	0	0	1	1
PGBD4	0	0	0	0	0	0	1	0	1
PGBD5	0	0	0	0	0	0	1	0	1
PGGHG	0	0	0	0	0	0	0	1	1
PHACTR1	0	0	0	0	0	0	1	0	1
PHACTR2	0	0	0	0	0	0	1	0	1
PHB2	0	0	0	0	0	0	0	1	1
PHC2	0	0	0	0	0	0	0	1	1
PHC3	0	0	0	0	0	0	1	0	1
PHF12	0	0	0	0	0	0	0	1	1
PHF2	0	0	0	0	0	0	0	1	1
PHF20	0	0	0	0	0	0	0	1	1
PHLDB3	0	0	0	0	0	0	1	0	1
PHOX2A	0	0	0	0	0	0	1	0	1
PHPT1	0	0	0	0	0	0	0	1	1
PHYKPL	1	0	0	0	0	0	0	0	1
PIAS2	0	0	0	0	0	0	0	1	1
PID1	1	0	0	0	0	0	0	0	1
PIDD1	0	0	0	0	0	0	0	1	1
PIGX	0	0	0	0	0	0	0	1	1
PIGZ	0	0	0	0	1	0	0	0	1
PIP4K2A	1	0	0	0	0	0	0	0	1
PIP5K1C	0	0	0	0	0	0	0	1	1
PITPNM1	0	0	1	0	0	0	0	0	1
PITPNM3	0	0	0	0	0	0	1	0	1
PKN1	0	0	0	0	0	0	0	1	1
PKN3	0	0	0	0	0	0	0	1	1
PLA2G12B	0	0	0	0	0	0	1	0	1
PLA2G2E	0	0	0	0	0	0	1	0	1
PLCB4	1	0	0	0	0	0	0	0	1
PLCH2	0	0	0	0	0	0	1	0	1
PLCL2	0	0	0	0	0	0	1	0	1
PLD5	0	0	0	0	0	0	1	0	1
PLEKHA3	1	0	0	0	0	0	0	0	1
PLEKHB1	0	0	0	0	0	0	1	0	1
PLEKHF1	0	0	0	0	0	0	1	0	1
PLEKHG5	0	0	0	0	0	0	1	0	1
PLEKHH3	0	0	0	0	0	0	0	1	1
PLEKHJ1	0	0	0	0	0	0	1	0	1
PLEKHM3	0	0	0	0	0	0	1	0	1
PLPP3	0	0	0	0	0	0	0	1	1
PLXNB2	0	0	0	0	0	0	0	1	1
PM20D2	0	0	0	0	0	0	0	1	1
PMCH	1	0	0	0	0	0	0	0	1
PMEL	0	0	0	0	1	0	0	0	1
PMFBP1	1	0	0	0	0	0	0	0	1
PMP2	1	0	0	0	0	0	0	0	1
PMP22	0	0	0	0	0	0	0	1	1
PNMA8B	0	0	0	0	0	0	0	1	1
PNPLA1	0	0	0	0	0	0	1	0	1
PNPLA2	0	0	0	0	0	0	0	1	1
PNPLA8	0	0	0	0	0	0	1	0	1
PODXL	0	0	0	0	0	0	0	1	1
POLR2E	0	0	0	0	0	0	0	1	1
PON1	0	0	0	0	0	0	1	0	1
POU2F2	0	0	0	0	0	0	0	1	1
POU3F3	1	0	0	0	0	0	0	0	1
POU6F2	0	0	0	0	0	0	1	0	1
PPAP2A	0	0	0	0	0	0	1	0	1
PPAP2C	0	1	0	0	0	0	0	0	1
PPARGC1A	1	0	0	0	0	0	0	0	1
PPHLN1	0	0	0	0	0	0	0	1	1
PPL	0	0	0	0	0	0	0	1	1
PPM1D	0	0	0	0	0	0	0	1	1
PPP1R12C	1	0	0	0	0	0	0	0	1
PPP1R14A	0	0	0	0	0	0	1	0	1
PPP1R2	1	0	0	0	0	0	0	0	1
PPP1R37	0	0	0	0	0	0	0	1	1
PPP2R1A	0	0	0	0	0	0	0	1	1
PPP2R2B	1	0	0	0	0	0	0	0	1
PPP2R3A	0	0	0	0	0	0	0	1	1
PPP2R3B	0	0	0	0	0	0	0	1	1
PPP4R1L	0	0	0	0	0	0	0	1	1
PPP5D1P	0	0	0	0	0	0	0	1	1
PPT2	0	0	0	0	0	0	1	0	1
PPT2-EGFL8	0	0	0	0	0	0	1	0	1
PQLC2	1	0	0	0	0	0	0	0	1
PRAM1	0	0	0	0	0	0	0	1	1
PRDX1	0	0	0	0	0	0	0	1	1
PRDX2	0	0	0	0	0	0	0	1	1
PRDX3	0	0	0	0	0	0	0	1	1
PRICKLE1	0	0	0	0	0	0	0	1	1
PRIM2	0	1	0	0	0	0	0	0	1
PRKAR1B	0	0	0	0	0	0	0	1	1
PRKAR2A	0	0	0	0	0	0	0	1	1
PRKCA	1	0	0	0	0	0	0	0	1
PRKCQ	1	0	0	0	0	0	0	0	1
PRKD1	1	0	0	0	0	0	0	0	1
PRKD2	0	0	0	0	0	0	0	1	1
PRLH	0	0	0	0	0	0	1	0	1
PRLHR	1	0	0	0	0	0	0	0	1
PRMT1	0	0	0	0	0	0	0	1	1
PRMT7	0	0	0	0	0	0	0	1	1
PROCR	0	0	0	0	0	0	1	0	1
PROX1	1	0	0	0	0	0	0	0	1
PRPF4	0	0	0	0	0	0	0	1	1
PRPF40B	0	0	0	0	0	0	0	1	1
PRPF6	0	0	0	0	0	0	0	1	1
PRPSAP1	0	0	0	0	0	0	0	1	1
PRR5-ARHGAP8	0	0	0	0	0	0	0	1	1
PRRG2	0	0	0	0	0	0	0	1	1
PRRT1	0	0	0	0	0	0	1	0	1
PRRX2	0	0	0	0	0	0	0	1	1
PRSS41	0	0	0	0	0	0	1	0	1
PRSS45	1	0	0	0	0	0	0	0	1
PRSS50	1	0	0	0	0	0	0	0	1
PRXL2C	0	0	0	0	0	0	0	1	1
PSIP1	1	0	0	0	0	0	0	0	1
PSMD7	1	0	0	0	0	0	0	0	1
PSMG3-AS1	0	0	0	0	0	0	0	1	1
PSORS1C1	0	0	0	0	0	0	1	0	1
PSTPIP2	0	0	0	0	1	0	0	0	1
PTCHD4	1	0	0	0	0	0	0	0	1
PTDSS2	0	0	0	0	0	0	0	1	1
PTGDS	0	0	0	0	0	0	1	0	1
PTGES2	0	0	0	0	0	0	0	1	1
PTGES3	0	0	0	0	0	0	0	1	1
PTGFRN	0	0	0	0	0	0	1	0	1
PTGR1	0	0	0	0	0	0	1	0	1
PTH1R	0	0	0	0	0	0	0	1	1
PTK2	0	0	0	0	0	0	0	1	1
PTK2B	0	0	0	0	0	0	1	0	1
PTN	0	0	0	0	0	0	1	0	1
PTOV1	0	0	0	0	0	0	0	1	1
PTPN14	0	1	0	0	0	0	0	0	1
PTPN21	0	0	0	0	0	0	0	1	1
PTPRA	0	0	0	0	0	0	0	1	1
PTPRC	1	0	0	0	0	0	0	0	1
PTPRD	0	0	0	0	0	0	0	1	1
PTPRF	0	0	0	0	0	1	0	0	1
PTPRN2	0	0	0	1	0	0	0	0	1
PTPRN2_1	0	0	1	0	0	0	0	0	1
PTPRN2_2	0	0	1	0	0	0	0	0	1
PTPRN2_3	0	0	1	0	0	0	0	0	1
PTPRZ1	0	0	0	0	0	0	1	0	1
PUDP	0	0	0	0	1	0	0	0	1
PUS10	0	0	0	0	1	0	0	0	1
PUS7	0	0	0	0	0	0	0	1	1
PXDC1	1	0	0	0	0	0	0	0	1
PYCARD	0	0	0	0	0	0	1	0	1
PYCR1	0	0	0	0	0	0	0	1	1
QRFP	1	0	0	0	0	0	0	0	1
R3HDM4	0	0	0	0	0	0	0	1	1
RAB10	0	0	0	0	0	0	0	1	1
RAB11FIP2	1	0	0	0	0	0	0	0	1
RAB1B	0	1	0	0	0	0	0	0	1
RAB43P1	0	0	0	0	0	0	1	0	1
RAB4B-EGLN2	0	0	0	0	0	0	1	0	1
RABAC1	1	0	0	0	0	0	0	0	1
RABEPK	0	0	0	0	0	0	0	1	1
RABL6	0	0	0	0	0	0	0	1	1
RAC2	0	0	0	0	0	0	1	0	1
RAD9A	0	0	0	0	0	0	0	1	1
RANBP1	0	0	0	0	0	0	0	1	1
RANBP10	0	0	0	0	0	0	0	1	1
RANBP9	0	0	0	0	0	0	0	1	1
RAP1GAP2	0	0	0	0	0	0	0	1	1
RARA	0	0	0	0	0	0	0	1	1
RARG	0	0	0	0	0	0	0	1	1
RASGEF1A	0	0	0	0	0	0	0	1	1
RASGEF1C	0	0	0	0	0	0	0	1	1
RASIP1	0	0	0	0	0	0	0	1	1
RASSF1	0	0	0	0	0	0	1	0	1
RBBP6	1	0	0	0	0	0	0	0	1
RBBP8NL	1	0	0	0	0	0	0	0	1
RBM24	0	0	0	0	1	0	0	0	1
RBM38	0	0	0	0	0	0	1	0	1
RBMS1	1	0	0	0	0	0	0	0	1
RCAN3	0	0	0	0	0	0	1	0	1
RCC1L	0	0	0	0	0	0	0	1	1
RCN1	1	0	0	0	0	0	0	0	1
RCOR2	1	0	0	0	0	0	0	0	1
REEP6	0	0	0	0	0	0	1	0	1
RELB	0	0	0	0	0	1	0	0	1
RETNLB	0	0	0	0	0	0	1	0	1
RFLNA	0	0	0	0	1	0	0	0	1
RFPL2	0	0	0	0	0	0	1	0	1
RFX1	0	0	0	0	0	0	0	1	1
RFX2	0	0	0	0	0	0	0	1	1
RGL2	0	0	0	0	0	1	0	0	1
RGMA	0	0	0	0	0	0	1	0	1
RGPD8	0	0	0	0	0	0	0	1	1
RGS1	1	0	0	0	0	0	0	0	1
RGS21	1	0	0	0	0	0	0	0	1
RGS7BP	0	0	0	0	0	0	0	1	1
RHBDD1	1	0	0	0	0	0	0	0	1
RHOBTB1	0	0	0	0	0	0	1	0	1
RHOH	0	0	0	0	0	0	1	0	1
RHPN1-AS1	0	0	0	0	0	0	0	1	1
RIMBP2	0	0	0	0	0	0	1	0	1
RIN3	0	0	0	0	0	0	0	1	1
RIPK3	0	0	0	0	0	0	1	0	1
RMC1	0	0	0	0	0	0	0	1	1
RMST	0	0	0	0	0	0	1	0	1
RN7SL555P	0	0	0	0	0	0	0	1	1
RNA5SP137	0	0	0	0	0	0	1	0	1
RNASE1	0	0	0	0	0	0	1	0	1
RNASE11	0	0	0	0	0	0	1	0	1
RNASE3	0	0	0	0	0	0	1	0	1
RNASEH2C	0	0	0	0	0	0	0	1	1
RNF103-CHMP3	0	0	0	0	0	0	0	1	1
RNF111	0	0	0	0	0	0	0	1	1
RNF125	0	0	0	0	0	1	0	0	1
RNF139	0	0	0	0	1	0	0	0	1
RNF144A	1	0	0	0	0	0	0	0	1
RNF157	0	0	0	0	0	0	1	0	1
RNF167	0	0	0	0	0	0	0	1	1
RNF4	0	0	0	0	0	0	0	1	1
RNF41	0	0	0	0	0	0	0	1	1
RNF6	0	0	0	0	0	0	0	1	1
RNPEP	0	0	0	0	0	0	0	1	1
RNPS1	0	0	0	0	0	0	0	1	1
RNU6-31P	0	0	0	0	1	0	0	0	1
ROBO2	0	0	0	0	0	0	0	1	1
ROGDI	0	0	0	0	0	0	0	1	1
RORB	1	0	0	0	0	0	0	0	1
RP1-136B1	0	0	0	0	0	0	1	0	1
RP1-202O8	0	0	0	0	0	0	1	0	1
RP1-223B1	0	0	0	0	0	0	1	0	1
RP11-1252I4	0	0	0	0	0	0	1	0	1
RP11-145H9	0	0	0	0	0	0	1	0	1
RP11-166D19	0	0	0	0	0	0	1	0	1
RP11-184A2	0	0	0	0	0	0	1	0	1
RP11-18I14	0	0	0	0	0	0	1	0	1
RP11-2C24	0	0	0	0	0	0	1	0	1
RP11-31L23	0	0	0	0	0	0	1	0	1
RP11-328C8	0	0	0	0	0	0	1	0	1
RP11-332H18	0	0	0	0	0	0	1	0	1
RP11-335O13	0	0	0	0	0	0	1	0	1
RP11-393K12	0	0	0	0	0	0	1	0	1
RP11-420G6	0	0	0	0	0	0	1	0	1
RP11-455J20	0	0	0	0	0	0	1	0	1
RP11-465B22	0	0	0	0	0	0	1	0	1
RP11-472B18	0	0	0	0	0	0	1	0	1
RP11-497G19	0	0	0	0	0	0	1	0	1
RP11-501C14	0	0	0	0	0	0	1	0	1
RP11-503C24	0	0	0	0	0	0	1	0	1
RP11-517H2	0	0	0	0	0	0	1	0	1
RP11-521B24	0	0	0	0	0	0	1	0	1
RP11-545A16	0	0	0	0	0	0	1	0	1
RP11-54K16	0	0	0	0	0	0	1	0	1
RP11-588L15	0	0	0	0	0	0	1	0	1
RP11-64B16	0	0	0	0	0	0	1	0	1
RP11-651P23	0	0	0	0	0	0	1	0	1
RP11-662M24	0	0	0	0	0	0	1	0	1
RP11-66N24	0	0	0	0	0	0	1	0	1
RP11-69C17	0	0	0	0	0	0	1	0	1
RP11-713P17	0	0	0	0	0	0	1	0	1
RP11-761I4	0	0	0	0	0	0	1	0	1
RP11-772E11	0	0	0	0	0	0	1	0	1
RP11-789C2	0	0	0	0	0	0	1	0	1
RP11-797E24	0	0	0	0	0	0	1	0	1
RP11-81N13	0	0	0	0	0	0	1	0	1
RP11-89K21	0	0	0	0	0	0	1	0	1
RP11-94M14	0	0	0	0	0	0	1	0	1
RP11-9E13	0	0	0	0	0	0	1	0	1
RP13-895J2	0	0	0	0	0	0	1	0	1
RP3-407E4	0	0	0	0	0	0	1	0	1
RP3-429O6	0	0	0	0	0	0	1	0	1
RP4-604G5	0	0	0	0	0	0	1	0	1
RP4-718N17	0	0	0	0	0	0	1	0	1
RP5-1065J22	0	0	0	0	0	0	1	0	1
RP5-1086L22	0	0	0	0	0	0	1	0	1
RP5-1142J19	0	0	0	0	0	0	1	0	1
RP5-940J5	0	0	0	0	0	0	1	0	1
RPA1	0	0	0	0	0	0	0	1	1
RPL12	0	0	0	0	0	0	1	0	1
RPL17	0	0	0	0	0	0	1	0	1
RPL18A	0	0	0	0	0	0	0	1	1
RPL23A	0	0	0	0	0	0	0	1	1
RPL23AP53	0	0	0	0	0	0	0	1	1
RPL26	0	0	0	0	0	0	0	1	1
RPL27A	1	0	0	0	0	0	0	0	1
RPL3	0	0	0	0	0	0	0	1	1
RPL6	0	0	0	0	0	0	0	1	1
RPL7L1	0	0	0	0	0	0	0	1	1
RPS2	0	0	0	0	0	0	0	1	1
RPS21	0	0	0	0	0	0	0	1	1
RPS29P31	0	0	0	0	0	0	0	1	1
RPS6KA2	0	0	0	0	1	0	0	0	1
RPS6KA5	0	0	0	0	0	0	0	1	1
RPS6KC1	1	0	0	0	0	0	0	0	1
RPS7	0	0	0	0	0	0	0	1	1
RPTOR	0	0	0	0	0	0	0	1	1
RREB1	0	0	0	0	0	0	1	0	1
RRN3P2	0	0	0	0	0	0	0	1	1
RSAD1	0	0	0	0	0	0	1	0	1
RTEL1	0	0	0	0	0	0	0	1	1
RTEL1-TNFRSF6B	0	0	0	0	0	0	0	1	1
RTL1	0	1	0	0	0	0	0	0	1
RUNX1	0	0	0	0	0	0	0	1	1
RUVBL2	0	0	0	0	0	0	0	1	1
RXRG	1	0	0	0	0	0	0	0	1
RYR1	0	0	0	0	0	0	0	1	1
S1PR2	0	0	0	0	0	0	0	1	1
S1PR5	1	0	0	0	0	0	0	0	1
SAC3D1	0	0	0	0	0	0	0	1	1
SAE1	0	0	0	0	0	0	0	1	1
SAFB2	0	0	0	0	0	1	0	0	1
SALL3	1	0	0	0	0	0	0	0	1
SARS	1	0	0	0	0	0	0	0	1
SARS2	0	0	0	0	0	0	0	1	1
SASH1	0	0	0	0	0	0	1	0	1
SBF2	0	0	0	0	0	0	0	1	1
SBNO2	0	0	0	0	0	0	1	0	1
SCAND1	0	0	0	0	0	0	0	1	1
SCAP	0	0	0	0	0	0	0	1	1
SCARB1	1	0	0	0	0	0	0	0	1
SCCPDH	1	0	0	0	0	0	0	0	1
SCGB1C1	0	0	0	0	0	0	1	0	1
SCN10A	0	0	0	0	0	0	1	0	1
SCN1A	1	0	0	0	0	0	0	0	1
SCN2A	0	0	0	0	0	0	0	1	1
SCN9A	0	0	0	0	0	0	1	0	1
SCOC	0	0	0	0	0	0	1	0	1
SCRIB	0	0	0	0	0	0	1	0	1
SDHAP3	0	0	0	0	0	0	0	1	1
SEC14L1	0	0	0	0	0	0	0	1	1
SEC23A	0	0	0	0	0	0	0	1	1
SEC24C	0	0	0	0	0	0	1	0	1
SECISBP2	0	0	0	0	0	0	0	1	1
SELV	0	0	0	0	0	0	1	0	1
SEMA3C	1	0	0	0	0	0	0	0	1
SEMA3F	0	0	0	0	0	0	0	1	1
SEMA4F	0	0	0	0	0	0	0	1	1
SEMA5A	0	0	0	0	0	0	1	0	1
SEMA6D	1	0	0	0	0	0	0	0	1
SENCR	0	0	0	0	0	0	1	0	1
SENP5	0	0	0	0	0	0	0	1	1
SEPTIN9	0	0	0	0	0	0	0	1	1
SERPINA6	0	0	0	0	0	0	1	0	1
SERPINB13	0	0	0	0	0	0	1	0	1
SERPING1	1	0	0	0	0	0	0	0	1
SETD4	0	0	0	0	0	0	0	1	1
SF3A2	0	0	0	0	0	0	0	1	1
SFMBT2	1	0	0	0	0	0	0	0	1
SFN	1	0	0	0	0	0	0	0	1
SFRP2	1	0	0	0	0	0	0	0	1
SFRP4	0	0	0	0	0	0	1	0	1
SFTPD	0	0	0	0	0	0	1	0	1
SGK223	0	0	0	0	0	0	1	0	1
SH2B2	0	0	0	0	0	0	1	0	1
SH2B3	0	0	0	0	0	0	0	1	1
SH2D2A	0	0	0	0	0	0	0	1	1
SH3BGRL3	0	0	0	0	0	0	1	0	1
SH3BP2	0	0	0	0	0	0	0	1	1
SH3BP4	0	0	0	0	0	0	0	1	1
SH3PXD2A	0	0	0	0	0	0	0	1	1
SH3PXD2B	0	0	0	0	0	0	0	1	1
SH3RF2	0	0	0	0	1	0	0	0	1
SHANK3	0	0	0	0	0	0	0	1	1
SHCBP1	1	0	0	0	0	0	0	0	1
SHD	0	0	0	0	0	0	0	1	1
SHH	1	0	0	0	0	0	0	0	1
SHOC1	0	0	0	0	0	0	0	1	1
SIPA1L3	0	0	0	0	0	0	0	1	1
SIRT7	0	0	0	0	0	0	0	1	1
SKOR1	0	0	0	0	0	0	1	0	1
SLAMF1	0	0	0	0	0	0	1	0	1
SLBP	0	0	0	0	0	0	0	1	1
SLC12A9	0	0	0	0	0	0	0	1	1
SLC16A12	0	0	0	0	0	0	0	1	1
SLC16A14	0	0	0	0	0	0	1	0	1
SLC16A3	0	0	0	0	0	0	0	1	1
SLC17A7	1	0	0	0	0	0	0	0	1
SLC17A9	0	0	0	0	1	0	0	0	1
SLC18A2	0	0	0	0	0	0	0	1	1
SLC19A1	0	0	0	0	0	0	1	0	1
SLC1A5	0	0	0	0	0	0	1	0	1
SLC1A6	0	0	0	0	0	0	1	0	1
SLC1A7	0	0	0	0	1	0	0	0	1
SLC20A2	0	0	0	0	0	0	0	1	1
SLC22A23	1	0	0	0	0	0	0	0	1
SLC25A1	0	0	0	0	0	0	0	1	1
SLC25A11	0	0	0	0	0	0	0	1	1
SLC25A36	1	0	0	0	0	0	0	0	1
SLC25A5	0	0	0	0	0	0	0	1	1
SLC27A6	0	0	0	0	1	0	0	0	1
SLC37A3	0	0	0	0	0	0	1	0	1
SLC39A14	0	0	0	0	0	0	0	1	1
SLC3A1	0	0	0	0	0	0	1	0	1
SLC43A3	0	0	0	0	0	1	0	0	1
SLC45A4	0	0	0	0	0	0	0	1	1
SLC52A1	0	0	0	0	0	0	1	0	1
SLC5A5	0	0	0	0	0	0	1	0	1
SLC6A1	0	0	0	0	0	0	1	0	1
SLC7A11	1	0	0	0	0	0	0	0	1
SLC8B1	0	0	0	0	0	0	0	1	1
SLC9A3	1	0	0	0	0	0	0	0	1
SLCO1C1	0	0	0	0	0	0	1	0	1
SLCO3A1	1	0	0	0	0	0	0	0	1
SLCO4A1	0	0	0	0	0	0	0	1	1
SLIT1	0	0	0	0	0	1	0	0	1
SMAD4	1	0	0	0	0	0	0	0	1
SMG6	0	0	0	0	0	0	0	1	1
SMG9	0	0	0	0	0	0	0	1	1
SMIM1	0	0	0	0	0	0	0	1	1
SMIM13	0	0	0	0	0	0	0	1	1
SMIM19	1	0	0	0	0	0	0	0	1
SMIM40	0	0	0	0	0	0	0	1	1
SMIM41	0	0	0	0	0	0	0	1	1
SMLR1	1	0	0	0	0	0	0	0	1
SMOC2	0	0	0	0	1	0	0	0	1
SMOX	0	0	0	0	0	0	0	1	1
SMTNL2	0	0	0	0	0	0	1	0	1
SMUG1	1	0	0	0	0	0	0	0	1
SMYD1	0	0	0	0	0	0	1	0	1
SMYD2	1	0	0	0	0	0	0	0	1
SNAI1	0	0	0	0	0	0	0	1	1
SNAP25	1	0	0	0	0	0	0	0	1
SNED1	0	0	0	0	0	0	0	1	1
SNED1-AS1	0	0	0	0	0	0	0	1	1
SNHG14	0	0	0	0	1	0	0	0	1
SNHG6	0	0	0	0	0	0	1	0	1
SNN	0	0	0	0	0	0	0	1	1
SNORD24	0	0	0	0	0	0	1	0	1
snoU13	0	0	0	0	0	0	1	0	1
SNRNP35	0	0	0	0	0	0	0	1	1
SNRPF-DT	0	0	0	0	0	0	0	1	1
SNRPN	0	1	0	0	0	0	0	0	1
SNX13	0	0	0	0	0	0	0	1	1
SNX19	0	0	0	0	0	0	0	1	1
SNX22	0	0	0	0	0	0	1	0	1
SNX9	1	0	0	0	0	0	0	0	1
SOCS3	1	0	0	0	0	0	0	0	1
[truncated: 357 more rows]
